# Supplementary material for: Metal-free decarbonylative alkylation–aminoxidation of styrene derivatives with aliphatic aldehydes and N-hydroxyphthalimide
Source: Royal Society of Chemistry journal article supplement (doi:10.1039/c7ob00030h), 2017-01-01

Electronic Supplementary Information

**Metal-free decarbonylative alkylation-aminoxidation of styrene derivatives with aliphatic aldehydes and N-hydroxyphthalimide**

Yu-Xia Li,<sup>a</sup> Qi-Qiang Wang<sup>b</sup> and Luo Yang\*<sup>a,b</sup>

**Table of Contents**

|                                                                              |               |
|------------------------------------------------------------------------------|---------------|
| <b>I. General information</b>                                                | <b>S1</b>     |
| <b>II. General experimental procedures</b>                                   | <b>S1</b>     |
| <b>III. Condition optimization</b>                                           | <b>S1-2</b>   |
| <b>Table S1. Condition optimization</b>                                      | <b>S2</b>     |
| <b>Table S2. Optimization of the ratio of mixed solvent</b>                  | <b>S2</b>     |
| <b>IV. Spectra data of products 3a-3p, 4a</b>                                | <b>S2-9</b>   |
| <b>V. Copies of <sup>1</sup>H and <sup>13</sup>C NMR spectra of products</b> | <b>S10-46</b> |

## I. General information

Unless otherwise noted, all commercially available compounds were used as provided without further purification. Dry solvents (toluene, benzene, chlorobenzene, o-dichlorobenzene, 1,2-dichloroethane, dioxane, acetonitrile, dimethylformamide) were used as commercially available;

Thin-layer chromatography (TLC) was performed using E. Merck silica gel 60 F254 precoated plates (0.25 mm) or Sorbent Silica Gel 60 F254 plates. The developed chromatography was analyzed by UV lamp (254 nm). High-resolution mass spectra (HRMS) were obtained from a JEOL JMS-700 instrument (ESI). Melting points are uncorrected. Nuclear magnetic resonance (NMR) spectra were recorded on a Bruker Avance 400 spectrometer at ambient temperature. Chemical shifts for  $^1\text{H}$  NMR spectra are reported in parts per million (ppm) from tetramethylsilane with the solvent resonance as the internal standard (chloroform:  $\delta$  7.26 ppm). Chemical shifts for  $^{13}\text{C}$  NMR spectra are reported in parts per million (ppm) from tetramethylsilane with the solvent as the internal standard ( $\text{CDCl}_3$ :  $\delta$  77.16 ppm). Data are reported as following: chemical shift, multiplicity (s = singlet, d = doublet, dd = doublet of doublets, t = triplet, q = quartet, m = multiplet, br = broad signal), coupling constant (Hz), and integration.

## II. General experimental procedures

A general experimental procedure is described as following:

To a solution of NHPI (0.2 mmol, 1 equiv.), styrene (0.6 mmol, 3equiv.) and aldehyde (0.6mmol, 3 equiv.) in mixed solvent of chlorobenzene (0.5 mL) and acetonitrile (0.5 mL) at ambient temperature. DTBP (0.4 mmol, 2.0 equiv.) was added with vigorous stirring. The reaction mixture was stirring at 130 °C (oil bath temperature) for 12 h under air. Afterwards the resulting mixture was cooled to room temperature, transferred to silica gel column directly and purified by column chromatography on silica gel with a mixture of EtOAc/petroleum ether as eluent to afford the pure product.

## III. Condition optimization

Table S1: Condition optimization <sup>a</sup>

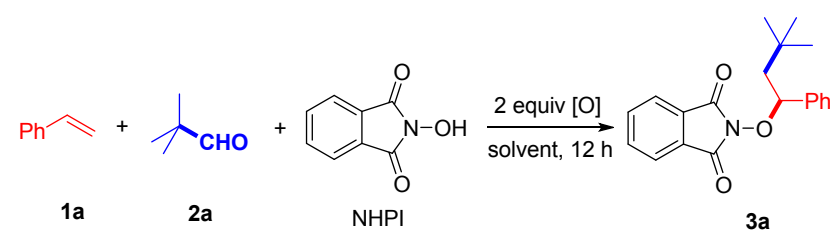

| entry    | ratio<br>1a:2a:NHPI | [O]<br>(2 equiv) | Solvent                                                                        | Temp<br>(°C) | yield<br>[%] <sup>b</sup> |
|----------|---------------------|------------------|--------------------------------------------------------------------------------|--------------|---------------------------|
| 1        | 1:1:1               | DTBP             | PhCl                                                                           | 130          | 15                        |
| 2        | 3:3:1               | DTBP             | PhCl                                                                           | 130          | 36                        |
| <b>3</b> | <b>3:3:1</b>        | <b>DTBP</b>      | <b>PhCl/CH<sub>3</sub>CN</b>                                                   | <b>130</b>   | <b>80</b>                 |
| 4        | 3:3:1               | DTBP             | <sup>o</sup> C <sub>6</sub> H <sub>4</sub> Cl <sub>2</sub> /CH <sub>3</sub> CN | 130          | 54                        |
| 5        | 3:3:1               | DTBP             | DCE /CH <sub>3</sub> CN                                                        | 130          | 53                        |

|    |       |      |                             |     |    |
|----|-------|------|-----------------------------|-----|----|
| 6  | 3:3:1 | DTBP | toluene /CH <sub>3</sub> CN | 130 | 51 |
| 7  | 3:3:1 | DTBP | benzene /CH <sub>3</sub> CN | 130 | 63 |
| 8  | 3:3:1 | DTBP | CH <sub>3</sub> CN          | 130 | 47 |
| 9  | 3:3:1 | TBHP | PhCl/CH <sub>3</sub> CN     | 130 | 55 |
| 10 | 3:3:1 | DCP  | PhCl/CH <sub>3</sub> CN     | 130 | 50 |
| 11 | 3:3:1 | DTBP | PhCl/CH <sub>3</sub> CN     | 110 | 36 |
| 12 | 3:3:1 | DTBP | PhCl/CH <sub>3</sub> CN     | 150 | 74 |

<sup>a</sup> Conditions: **1a** (3 equiv, 0.6 mmol), **2a** (3 equiv, 0.6 mmol), NHPI (0.2 mmol), DTBP (2.0 equiv, 0.4 mmol), solvent (1.0 mL or mixed solvents in 1:1 volume ratio), reacted for 12 h under air unless otherwise noted. <sup>b</sup> Isolated yields.

**Table S2: Optimization of the ratio of mixed solvent <sup>a</sup>**

| Entry    | ratio<br>PhCl : CH <sub>3</sub> CN | Yield (%) <sup>b</sup> |
|----------|------------------------------------|------------------------|
| <b>1</b> | <b>1:1</b>                         | <b>80</b>              |
| 2        | 1:4                                | 61                     |
| 3        | 2:3                                | 72                     |
| 4        | 3:2                                | 74                     |
| 5        | 4:1                                | 70                     |

<sup>a</sup> Conditions: **1a** (3 equiv, 0.6 mmol), **2a** (3 equiv, 0.6 mmol), NHPI (0.2 mmol), DTBP (2.0 equiv, 0.4 mmol), solvent (1.0 mL or mixed solvents), reacted for 12 h under air unless otherwise noted. <sup>b</sup> Isolated yields.

#### IV. Spectra data of products 3a-3p, 4a

##### (3a) 2-(3,3-dimethyl-1-phenylbutoxy)isoindoline-1,3-dione

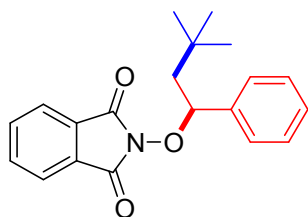

The title compound was prepared according to the general procedure described above by the reaction between 2-hydroxyisoindoline-1,3-dione (**NHPI**) with styrene (**1a**) and pivalaldehyde(**2a**), and purified by flash column chromatography as white solid (51.9 mg, 80%).

M.p. 132-134 °C. <sup>1</sup>H NMR (400 MHz, CDCl<sub>3</sub>) δ 7.72–7.63 (m, 4H), 7.45-7.43 (m, 2H), 7.29-7.27 (m, 3H), 5.54-5.51 (m, 1H), 2.23-2.18 (m, 1H), 1.88-1.75 (m, 1H), 1.06 (s, 9H). <sup>13</sup>C NMR (101 MHz, CDCl<sub>3</sub>) δ 163.76, 139.78, 134.27, 128.95, 128.88, 128.34, 128.24, 123.31, 86.96, 48.90, 30.62, 30.14. IR(cm<sup>-1</sup>): 2933, 1726, 1516, 1466, 1193, 1111. HRMS: calcd. for [M+Na]<sup>+</sup> C<sub>20</sub>H<sub>21</sub>NNaO<sub>3</sub>: 346.1419, found: 346.1389.

### (3b) 2-(1-(4-(tert-butyl)phenyl)-3,3-dimethylbutoxy)isoindoline-1,3-dione

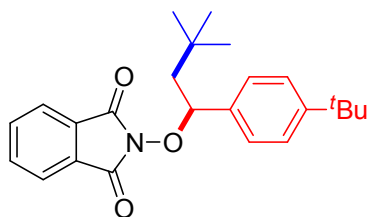

The title compound was prepared according to the general procedure described above by the reaction between 2-hydroxyisoindoline-1,3-dione (**NHPI**) with 1-(tert-butyl)-4-vinylbenzene (**1b**) and pivalaldehyde(**2a**), and purified by flash column chromatography as white solid (66 mg, 87%).

M.p. 136-138 °C. <sup>1</sup>H NMR (400 MHz, CDCl<sub>3</sub>) δ 7.70 – 7.64 (m, 4H), 7.37 – 7.34 (m, 2H), 7.30 – 7.26 (m, 2H), 5.56-5.53 (m, 1H), 2.20-2.14 (m, 1H), 1.78-1.73 (m, 1H), 1.25 (s, 9H), 1.06 (s, 9H). <sup>13</sup>C NMR (101 MHz, CDCl<sub>3</sub>) δ 163.89, 151.83, 136.77, 134.24, 129.06, 127.79, 125.24, 123.27, 86.74, 49.09, 34.68, 31.38, 30.64, 30.17. IR(cm<sup>-1</sup>): 2950, 1779, 1723, 1503, 1463, 1354, 978, 696. HRMS: calcd. for [M+Na]<sup>+</sup> C<sub>24</sub>H<sub>29</sub>NNaO<sub>3</sub>: 402.2045, found: 402.2046.

### (3c) 2-(3,3-dimethyl-1-(p-tolyl)butoxy)isoindoline-1,3-dione

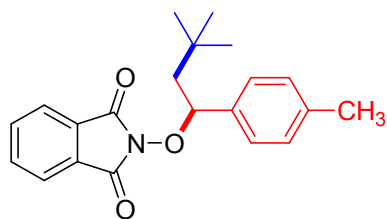

The title compound was prepared according to the general procedure described above by the reaction between 2-hydroxyisoindoline-1,3-dione (**NHPI**) with 1-methyl-4-vinylbenzene (**1c**) and pivalaldehyde(**2a**), and purified by flash column chromatography as white solid (51 mg, 76%).

M.p. 101-102 °C. <sup>1</sup>H NMR (400 MHz, CDCl<sub>3</sub>) δ 7.70 – 7.63 (m, 4H), 7.32 (d, *J* = 8.0 Hz, 2H), 7.08 (d, *J* = 8.0 Hz, 2H), 5.51-5.48(m, 1H), 2.28 (s, 3H), 2.22-2.16 (m, 1H), 1.79-1.74 (m, 1H), 1.05 (s, 9H). <sup>13</sup>C NMR (101 MHz, CDCl<sub>3</sub>) δ 163.82, 138.74, 136.80, 134.24, 129.04, 128.98, 128.22, 123.31, 86.83, 48.90, 30.59, 30.16, 21.34. IR(cm<sup>-1</sup>): 2941, 1796, 1723, 1522, 1454, 962. HRMS: calcd. for [M+Na]<sup>+</sup> C<sub>21</sub>H<sub>23</sub>NNaO<sub>3</sub>: 360.1576, found: 360.1575.

### (3d) 2-(1-(4-chlorophenyl)-3,3-dimethylbutoxy)isoindoline-1,3-dione

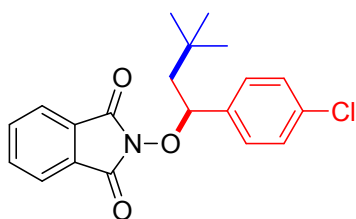

The title compound was prepared according to the general procedure described above by the reaction between 2-hydroxyisoindoline-1,3-dione (**NHPI**) with 1-chloro-4-vinylbenzene (**1d**) and pivalaldehyde(**2a**), and purified by flash column chromatography as white solid (40.2 mg, 56%).

M.p. 138-140 °C. <sup>1</sup>H NMR (400 MHz, CDCl<sub>3</sub>) δ 7.72 – 7.66(m, 4H), 7.40 – 7.37 (m, 2H), 7.27 (s, 1H), 7.25 (s, 1H), 5.52-5.49 (m, 1H), 2.19-2.13 (m, 1H), 1.73-1.69(m, 1H), 1.05 (s, 9H). <sup>13</sup>C NMR (101 MHz, CDCl<sub>3</sub>) δ 163.74, 138.49, 134.73, 134.41, 129.57, 128.85, 128.61, 123.43, 86.22, 49.12, 30.62, 30.13. IR(cm<sup>-1</sup>): 2958, 1779, 1723, 1597, 1488, 1345, 696. HRMS: calcd. for [M+Na]<sup>+</sup> C<sub>20</sub>H<sub>20</sub>CINaO<sub>3</sub>; 380.1029, found: 380.1027.

**(3e) 2-(1-(3-chlorophenyl)-3,3-dimethylbutoxy)isoindoline-1,3-dione**

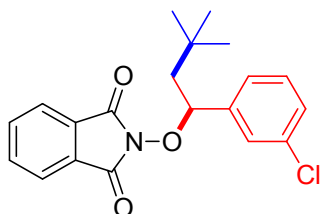

The title compound was prepared according to the general procedure described above by the reaction between 2-hydroxyisoindoline-1,3-dione (**NHPI**) with 1-chloro-3-vinylbenzene (**1e**) and pivalaldehyde(**2a**), and purified by flash column chromatography as white solid (50.5 mg, 71%).

M.p. 147-148 °C. <sup>1</sup>H NMR (400 MHz, CDCl<sub>3</sub>) δ 7.73 – 7.66 (m, 4H), 7.43-7.29 (m, 1H), 7.39 – 7.36 (m, 1H), 7.24-7.23 (m, 2H), 5.49-5.46 (m, 1H), 2.18-2.12 (m, 1H), 1.72-1.67 (m, 1H), 1.07 (s, 9H). <sup>13</sup>C NMR (101 MHz, CDCl<sub>3</sub>) δ 163.75, 142.17, 134.43, 134.14, 129.73, 129.01, 128.87, 128.24, 126.21, 123.46, 86.33, 49.28, 30.67, 30.12. IR(cm<sup>-1</sup>): 2958, 1788, 1732, 1572, 1463, 1370, 687. HRMS: calcd. for [M+Na]<sup>+</sup> C<sub>20</sub>H<sub>20</sub>CINaO<sub>3</sub>; 380.1029, found: 380.1024.

**(3f) 2-(1-(2-chlorophenyl)-3,3-dimethylbutoxy)isoindoline-1,3-dione**

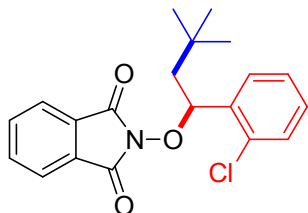

The title compound was prepared according to the general procedure described above by the reaction between 2-hydroxyisoindoline-1,3-dione (**NHPI**) with 1-chloro-2-vinylbenzene (**1f**) and pivalaldehyde(**2a**), and purified by flash column chromatography as white solid (30 mg, 42%).

M.p. 123-124 °C. <sup>1</sup>H NMR (400 MHz, CDCl<sub>3</sub>) δ 7.92 (d, *J* = 7.6 Hz, 1H), 7.73 – 7.66 (m, 4H), 7.37 – 7.33 (m, 1H), 7.21 – 7.20 (m, 2H), 6.20-6.17 (m, 1H), 2.14-2.08 (m, 1H), 1.72-1.68 (m, 1H), 1.12 (s, 9H). <sup>13</sup>C NMR (101 MHz, CDCl<sub>3</sub>) δ 163.78, 137.88, 134.39, 133.47, 129.73, 129.11,

129.01, 127.20, 123.45, 82.61, 49.11, 30.90, 30.14. IR( $\text{cm}^{-1}$ ): 2950, 1788, 1723, 1480, 1429, 1370, 696. HRMS: calcd. for  $[\text{M}+\text{Na}]^+$   $\text{C}_{20}\text{H}_{20}\text{ClNNaO}_3$ : 380.1029, found: 380.1021.

**(3g) 2-(1-(4-bromophenyl)-3,3-dimethylbutoxy)isoindoline-1,3-dione**

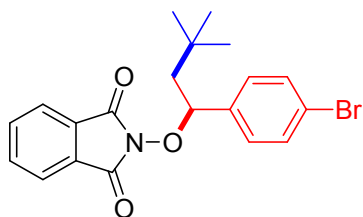

The title compound was prepared according to the general procedure described above by the reaction between 2-hydroxyisoindoline-1,3-dione (**NHPI**) with 1-bromo-4-vinylbenzene (**1g**) and pivalaldehyde(**2a**), and purified by flash column chromatography as white solid (50.5 mg, 63%).

M.p. 121-123 °C.  $^1\text{H}$  NMR (400 MHz,  $\text{CDCl}_3$ )  $\delta$  7.72 – 7.66 (m, 4H), 7.44 – 7.40 (m, 2H), 7.34 – 7.32(m, 2H), 5.51-5.48 (m, 1H), 2.18-2.12 (m, 1H), 1.72-1.68 (m, 1H), 1.05 (s, 9H).  $^{13}\text{C}$  NMR (101 MHz,  $\text{CDCl}_3$ )  $\delta$  163.77, 139.04, 134.44, 131.58, 129.86, 128.86, 123.46, 122.99, 86.29, 49.17, 30.65, 30.14. IR( $\text{cm}^{-1}$ ):2958, 1779, 1740, 1597, 1488, 1370, 687. HRMS: calcd. for  $[\text{M}+\text{Na}]^+$   $\text{C}_{20}\text{H}_{20}\text{BrNNaO}_3$ : 424.0524, found: 424.0516.

**(3h) 2-(1-(3-bromophenyl)-3,3-dimethylbutoxy)isoindoline-1,3-dione**

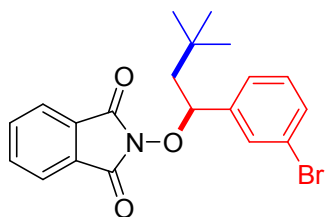

The title compound was prepared according to the general procedure described above by the reaction between 2-hydroxyisoindoline-1,3-dione (**NHPI**) with 1-bromo-3-vinylbenzene (**1h**) and pivalaldehyde(**2a**), and purified by flash column chromatography as white solid (52.3 mg, 65%).

M.p. 144-145 °C.  $^1\text{H}$  NMR (400 MHz,  $\text{CDCl}_3$ )  $\delta$  7.72 – 7.66 (m, 4H), 7.58 (t,  $J = 2.0$  Hz, 1H), 7.44 – 7.38 (m, 2H), 7.18 (t,  $J = 7.8$  Hz, 1H), 5.48-5.45 (m, 1H), 2.17-2.11 (m, 1H), 1.72-1.67 (m, 1H), 1.07 (s, 9H).  $^{13}\text{C}$  NMR (101 MHz,  $\text{CDCl}_3$ )  $\delta$  163.78, 142.50, 134.45, 131.96, 131.18, 130.05, 128.95, 126.69, 123.49, 122.33, 86.35, 49.38, 30.71, 30.14. IR( $\text{cm}^{-1}$ ): 2933, 1726, 1559, 1466, 1363, 689. HRMS: calcd. for  $[\text{M}+\text{Na}]^+$   $\text{C}_{20}\text{H}_{20}\text{BrNNaO}_3$ : 424.0524, found: 424.0519.

**(3i) 2-(1-(4-fluorophenyl)-3,3-dimethylbutoxy)isoindoline-1,3-dione**

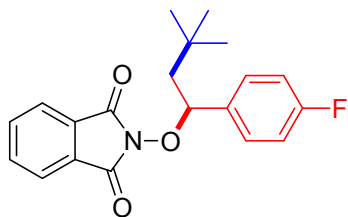

The title compound was prepared according to the general procedure described above by the reaction between 2-hydroxyisoindoline-1,3-dione (**NHPI**) with 1-fluoro-4-vinylbenzene (**1i**) and pivalaldehyde(**2a**), and purified by flash column chromatography as white solid (48.3 mg, 71%).

M.p. 145-146 °C. <sup>1</sup>H NMR (400 MHz, CDCl<sub>3</sub>) δ 7.74 – 7.67 (m, 4H), 7.46-7.42 (m, 2H), 6.99 (t, *J* = 8.8Hz, 2H), 5.53-5.50 (m, 1H), 2.23-2.18 (m, 1H), 1.79-1.74 (m, 1H), 1.07 (s, 9H). <sup>13</sup>C NMR (101 MHz, CDCl<sub>3</sub>) δ 164.31, 163.78, 161.85, 135.70, 135.67, 134.40, 130.15, 130.07, 128.85, 123.41, 115.45, 115.24, 86.24, 48.96, 30.60, 30.15. IR(cm<sup>-1</sup>): 2942, 1726, 1516, 1457, 1355, 1136. HRMS: calcd. for [M+Na]<sup>+</sup> C<sub>20</sub>H<sub>20</sub>FNNaO<sub>3</sub>: 364.1325, found: 364.1319.

### (3j) 2-(trans-3,3-dimethyl-1,2-diphenylbutoxy)isoindoline-1,3-dione

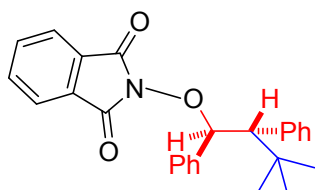

The title compound was prepared according to the general procedure described above by the reaction between 2-hydroxyisoindoline-1,3-dione (**NHPI**) with (E)-1,2-diphenylethene(**1j**) and pivalaldehyde(**2a**), and purified by flash column chromatography as white solid(42mg, 53%, trans:cis=1.1:1).

M.p. 153-154 °C. <sup>1</sup>H NMR (400 MHz, CDCl<sub>3</sub>) δ 7.67 – 7.61 (m, 4H), 7.19 (s, 2H), 7.01 – 6.97(m, 8H), 5.97 (d, *J* = 10.0 Hz, 1H), 3.29 (d, *J* = 10.4 Hz, 1H), 1.21 (s, 9H). <sup>13</sup>C NMR (101 MHz, CDCl<sub>3</sub>) δ 163.64, 140.93, 137.85, 134.25, 129.50, 128.92, 128.36, 127.52, 126.03, 123.29, 90.51, 60.42, 34.76, 30.05. IR(cm<sup>-1</sup>): 2921, 1826, 1580, 1516, 1479, 1193, 1046. HRMS: calcd. for [M+Na]<sup>+</sup> C<sub>26</sub>H<sub>25</sub>NNaO<sub>3</sub>: 422.1732, found: 422.1727.

### (3j') 2-(cis-3,3-dimethyl-1,2-diphenylbutoxy)isoindoline-1,3-dione

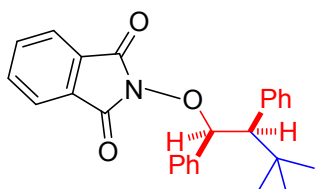

The title compound was prepared according to the general procedure described above by the reaction between 2-hydroxyisoindoline-1,3-dione (**NHPI**) with *cis*-1,2-diphenylethene (**1j'**) and pivalaldehyde(**2a**), and purified by flash column chromatography as white solid(48 mg, 60%, trans:cis=3:1).

M.p. 153-154 °C. <sup>1</sup>H NMR (400 MHz, CDCl<sub>3</sub>) δ 7.64 – 7.61 (m, 4H), 7.21 (m, 5H), 7.16 – 7.10 (m, 5H), 6.18 (d, *J* = 4.8Hz, 1H), 2.83 (d, *J* = 4.8 Hz, 1H), 1.05 (s, 9H). <sup>13</sup>C NMR (101 MHz, CDCl<sub>3</sub>) δ 163.82, 138.71, 138.29, 134.24, 129.05, 128.69, 128.53, 127.71, 127.47, 126.64, 123.24, 88.41, 62.93, 34.88, 29.66. IR(cm<sup>-1</sup>): 2921, 1826, 1580, 1516, 1479, 1193, 1046. HRMS: calcd. for [M+Na]<sup>+</sup> C<sub>26</sub>H<sub>25</sub>NNaO<sub>3</sub>: 422.1732, found: 422.1727.

### (3k) 2-(3-methyl-1-phenylbutoxy)isoindoline-1,3-dione

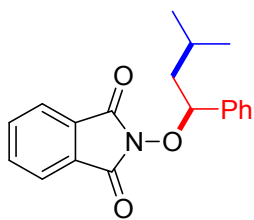

The title compound was prepared according to the general procedure described above by the reaction between 2-hydroxyisoindoline-1,3-dione (**NHPI**) with styrene (**1a**) and isobutyraldehyde(**2b**), and purified by flash column chromatography as a colorless oil (45.2 mg, 74%).

$^1\text{H NMR}$  (400 MHz,  $\text{CDCl}_3$ )  $\delta$  7.72 – 7.65 (m, 4H), 7.47-7.44 (m, 2H), 7.34-7.29 (m, 3H), 5.44-5.41 (m, 1H), 2.15 – 2.08 (m, 1H), 1.81-1.72 (m, 2H), 1.04 (d,  $J = 6.4$  Hz, 3H), 0.98 (d,  $J = 6.4$  Hz, 3H).  $^{13}\text{C NMR}$  (101 MHz,  $\text{CDCl}_3$ )  $\delta$  163.84, 138.62, 134.32, 129.08, 128.96, 128.40, 128.26, 123.39, 87.78, 44.11, 25.08, 22.83, 22.69. IR( $\text{cm}^{-1}$ ): 2941, 1796, 1732, 1589, 1496, 1370, 1180. HRMS: calcd. for  $[\text{M}+\text{Na}]^+$   $\text{C}_{19}\text{H}_{19}\text{NNaO}_3$ : 332.1263, found: 332.1263.

### (3l) 2-((3-methyl-1-phenylpentyl)oxy)isoindoline-1,3-dione<sup>1</sup>

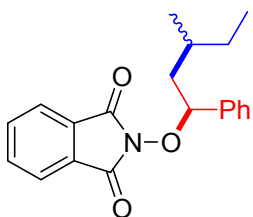

The title compound was prepared according to the general procedure described above by the reaction between 2-hydroxyisoindoline-1,3-dione (**NHPI**) with styrene (**1a**) and 2-methylbutanal(**2c**), and purified by flash column chromatography as a colorless oil (47.0 mg, 73%).

$^1\text{H NMR}$  (400 MHz,  $\text{CDCl}_3$ )  $\delta$  7.71 – 7.64 (m, 4H), 7.47-7.45(m, 2H), 7.31 – 7.29 (m, 3H), 5.47-5.44 (m, 1H), 2.27 – 2.20 (m, 1H), 1.78 – 1.70 (m, 1H), 1.59 – 1.58 (m, 1H), 1.45 – 1.40 (m, 1H), 1.29-1.21 (m, 1H), 1.05 (d,  $J = 6.4$  Hz, 3H), 0.90 (t,  $J = 7.6$  Hz, 3H).  $^{13}\text{C NMR}$  (101 MHz,  $\text{CDCl}_3$ )  $\delta$  163.85, 139.00, 134.33, 129.03, 128.94, 128.38, 128.16, 123.38, 87.43, 42.51, 31.18, 29.78, 19.10, 11.27. IR( $\text{cm}^{-1}$ ): 2966, 1796, 1732, 1496, 1454, 1362, 1180. HRMS: calcd. for  $[\text{M}+\text{Na}]^+$   $\text{C}_{20}\text{H}_{21}\text{NNaO}_3$ : 346.1419, found: 346.1385.

### (4m) 2-((3-methyl-1-phenylhexyl)oxy)isoindoline-1,3-dione<sup>1</sup>

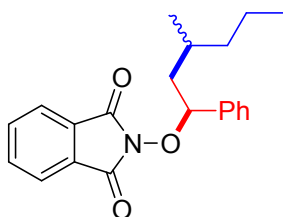

The title compound was prepared according to the general procedure described above by the

<sup>1</sup> Diastereoselectivities were not determined.



reaction between 2-hydroxyisoindoline-1,3-dione (**NHPI**) with styrene (**1a**) and 2-methylpentanal (**2d**), and purified by flash column chromatography as a colorless oil (45.5 mg, 68%).

<sup>1</sup>H NMR (400 MHz, CDCl<sub>3</sub>) δ 7.72-7.65 (m, 4H), 7.46 – 7.44 (m, 2H), 7.33-7.30 (m, 3H), 5.43 (t, *J* = 7.4 Hz, 1H), 2.03 – 1.92 (m, 2H), 1.58 – 1.42 (m, 2H), 1.33 – 1.29 (m, 2H), 1.19 – 1.14 (m, 1H), 0.95 (d, *J* = 6.6 Hz, 3H), 0.87 (t, *J* = 7.2 Hz, 3H). <sup>13</sup>C NMR (101 MHz, CDCl<sub>3</sub>) δ 163.85, 138.34, 134.32, 129.13, 128.96, 128.41, 128.38, 128.28, 128.03, 126.33, 123.40, 123.38, 88.01, 87.37, 41.81, 39.40, 29.52, 20.41, 19.95, 19.86, 14.38. IR(cm<sup>-1</sup>): 2950, 1736, 1504, 1454, 1336. HRMS: calcd. for [M+Na]<sup>+</sup> C<sub>21</sub>H<sub>23</sub>NNaO<sub>3</sub>: 360.1576, found: 360.1578.

### (3n) 2-((3-ethyl-1-phenylpentyl)oxy)isoindoline-1,3-dione

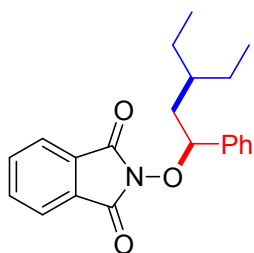

The title compound was prepared according to the general procedure described above by the reaction between 2-hydroxyisoindoline-1,3-dione (**NHPI**) with styrene (**1a**) and 2-ethylbutanal (**2e**), and purified by flash column chromatography as a colorless oil (45.2 mg, 71%).

<sup>1</sup>H NMR (400 MHz, CDCl<sub>3</sub>) δ 7.72 – 7.64 (m, 4H), 7.47-7.45 (m, 2H), 7.31 – 7.30 (m, 3H), 5.42(t, *J* = 7.0 Hz, 1H), 2.17 – 2.10 (m, 1H), 1.85 – 1.80 (m, 1H), 1.48 – 1.37 (m, 5H), 0.90 – 0.85 (m, 6H). <sup>13</sup>C NMR (101 MHz, CDCl<sub>3</sub>) δ 163.84, 138.79, 134.32, 129.05, 128.96, 128.38, 128.26, 123.38, 87.85, 38.61, 36.90, 25.53, 25.28, 10.68, 10.60. IR(cm<sup>-1</sup>): 2958, 1796, 1732, 1505, 1471, 1370, 1172. HRMS: calcd. for [M+Na]<sup>+</sup> C<sub>21</sub>H<sub>23</sub>NNaO<sub>3</sub>: 360.1576, found: 360.1571.

### (3o) 2-(2-cyclohexyl-1-phenylethoxy)isoindoline-1,3-dione

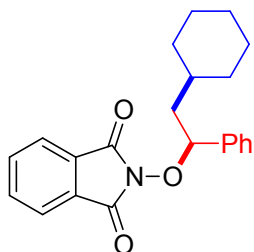

The title compound was prepared according to the general procedure described above by the reaction between 2-hydroxyisoindoline-1,3-dione (**NHPI**) with styrene (**1a**) and 2-ethylhexanal (**2f**), and purified by flash column chromatography as white solid (43.2 mg, 62%).

M.p. 133-135 °C. <sup>1</sup>H NMR (400 MHz, CDCl<sub>3</sub>) δ 7.72 – 7.65 (m, 4H), 7.46 – 7.44 (m, 2H), 7.32 – 7.29 (m, 3H), 5.48-5.45 (m, 1H), 2.15-2.07 (m, 1H), 1.95 (d, *J* = 12.8 Hz, 1H), 1.81 – 1.71 (m, 5H), 1.54 – 1.49 (m, 1H), 1.27 – 1.17(m, 3H), 1.05 – 0.96 (m, 2H). <sup>13</sup>C NMR (101 MHz, CDCl<sub>3</sub>) δ 163.85, 138.74, 134.32, 129.05, 128.95, 128.39, 128.23, 123.39, 87.20, 42.82, 34.34, 33.61, 33.24, 26.64, 26.28. IR(cm<sup>-1</sup>): 2916, 2849, 1796, 1715, 1505, 1463, 1446, 1362, 1180. HRMS: calcd. for [M+Na]<sup>+</sup> C<sub>22</sub>H<sub>23</sub>NNaO<sub>3</sub>: 372.1576, found: 372.1598.

**(3p) 2-((3-ethyl-1-phenylheptyl)oxy)isoindoline-1,3-dione<sup>1</sup>**

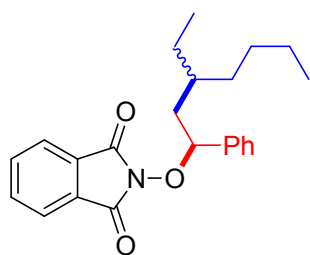

The title compound was prepared according to the general procedure described above by the reaction between 2-hydroxyisoindoline-1,3-dione (NHPI) with styrene (**1a**) and 2-ethylhexanal (**2g**), and purified by flash column chromatography as a colorless oil (45.2 mg, 61%).

<sup>1</sup>H NMR (400 MHz, CDCl<sub>3</sub>) δ 7.72 – 7.65 (m, 4H), 7.47-7.44 (m, 2H), 7.30 (d, *J* = 6.0 Hz, 3H), 5.42 (t, *J* = 7.0 Hz, 1H), 2.13– 2.12 (m, 1H), 1.84-1.78 (m, 1H), 1.50-1.44 (m, 2H), 1.40 – 1.37 (m, 2H), 1.27 (s, 5H), 0.89 – 0.85 (m, 6H). <sup>13</sup>C NMR (101 MHz, CDCl<sub>3</sub>) δ 163.85, 138.82, 138.73, 134.31, 129.05, 128.97, 128.38, 128.30, 128.26, 123.38, 87.89, 87.84, 39.08, 38.94, 35.50, 32.89, 32.67, 28.72, 28.60, 26.02, 25.75, 23.17, 23.13, 14.26, 14.25, 10.61, 10.54. IR(cm<sup>-1</sup>): 2950, 2933, 1788, 1732, 1597, 1496, 1345, 1188. HRMS: calcd. for [M+Na]<sup>+</sup> C<sub>23</sub>H<sub>27</sub>NNaO<sub>3</sub>: 388.1889, found: 388.1864.

**(4a) O-(3,3-dimethyl-1-phenylbutyl)hydroxylamine**

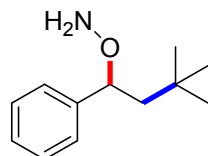

To a solution of **3a** (64.6mg, 0.2 mmol) in 10% MeOH in CHCl<sub>3</sub> (2.0 mL) was added hydrazine monohydrate (0.03 mL, 0.6 mm), and the reaction mixture was stirred at room temperature. Upon completion (TLC monitoring, 16 h), a white precipitate appeared in a colorless reaction solution. The reaction mixture was passed through a short plug of silica gel washing with 30% EtOAc in hexane (30 mL). The filtrate was concentrated, and the residue was taken up in hexane (10 mL). The solution was acidified to pH=3 with H<sub>2</sub>SO<sub>4</sub> in ether/hexane (1:3). A white precipitate formed and was separated by filtration washing with ether/hexane (1:3, 10 mL). The collected white precipitate was partitioned between ether (5 mL) and aqueous saturated K<sub>2</sub>CO<sub>3</sub> solution (5 mL), and the aqueous phase was extracted with additional portions of ether (5 mL x 3). The combined organic layers were dried and concentrated to give O-(3,3-dimethyl-1-phenylbutyl)hydroxylamine as a colorless oil (29.7 mg, 77%);

<sup>1</sup>H NMR (400 MHz, CDCl<sub>3</sub>) δ 7.38 – 7.28 (m, 5H), 5.13 (s, 2H), 4.62-4.59 (m, 1H), 1.79-1.74 (m, 1H), 1.48-1.44 (m, 1H), 0.97 (s, 9H). <sup>13</sup>C NMR (101 MHz, CDCl<sub>3</sub>) δ 143.75, 128.70, 127.66, 126.73, 85.56, 50.28, 30.59, 30.26. IR(cm<sup>-1</sup>): 2949, 1581, 1464, 1377. HRMS: calcd. for [M+H]<sup>+</sup> C<sub>12</sub>H<sub>20</sub>NO: 194.1545, found: 194.1539.

**VI. Copies of <sup>1</sup>H and <sup>13</sup>C NMR spectra of products**

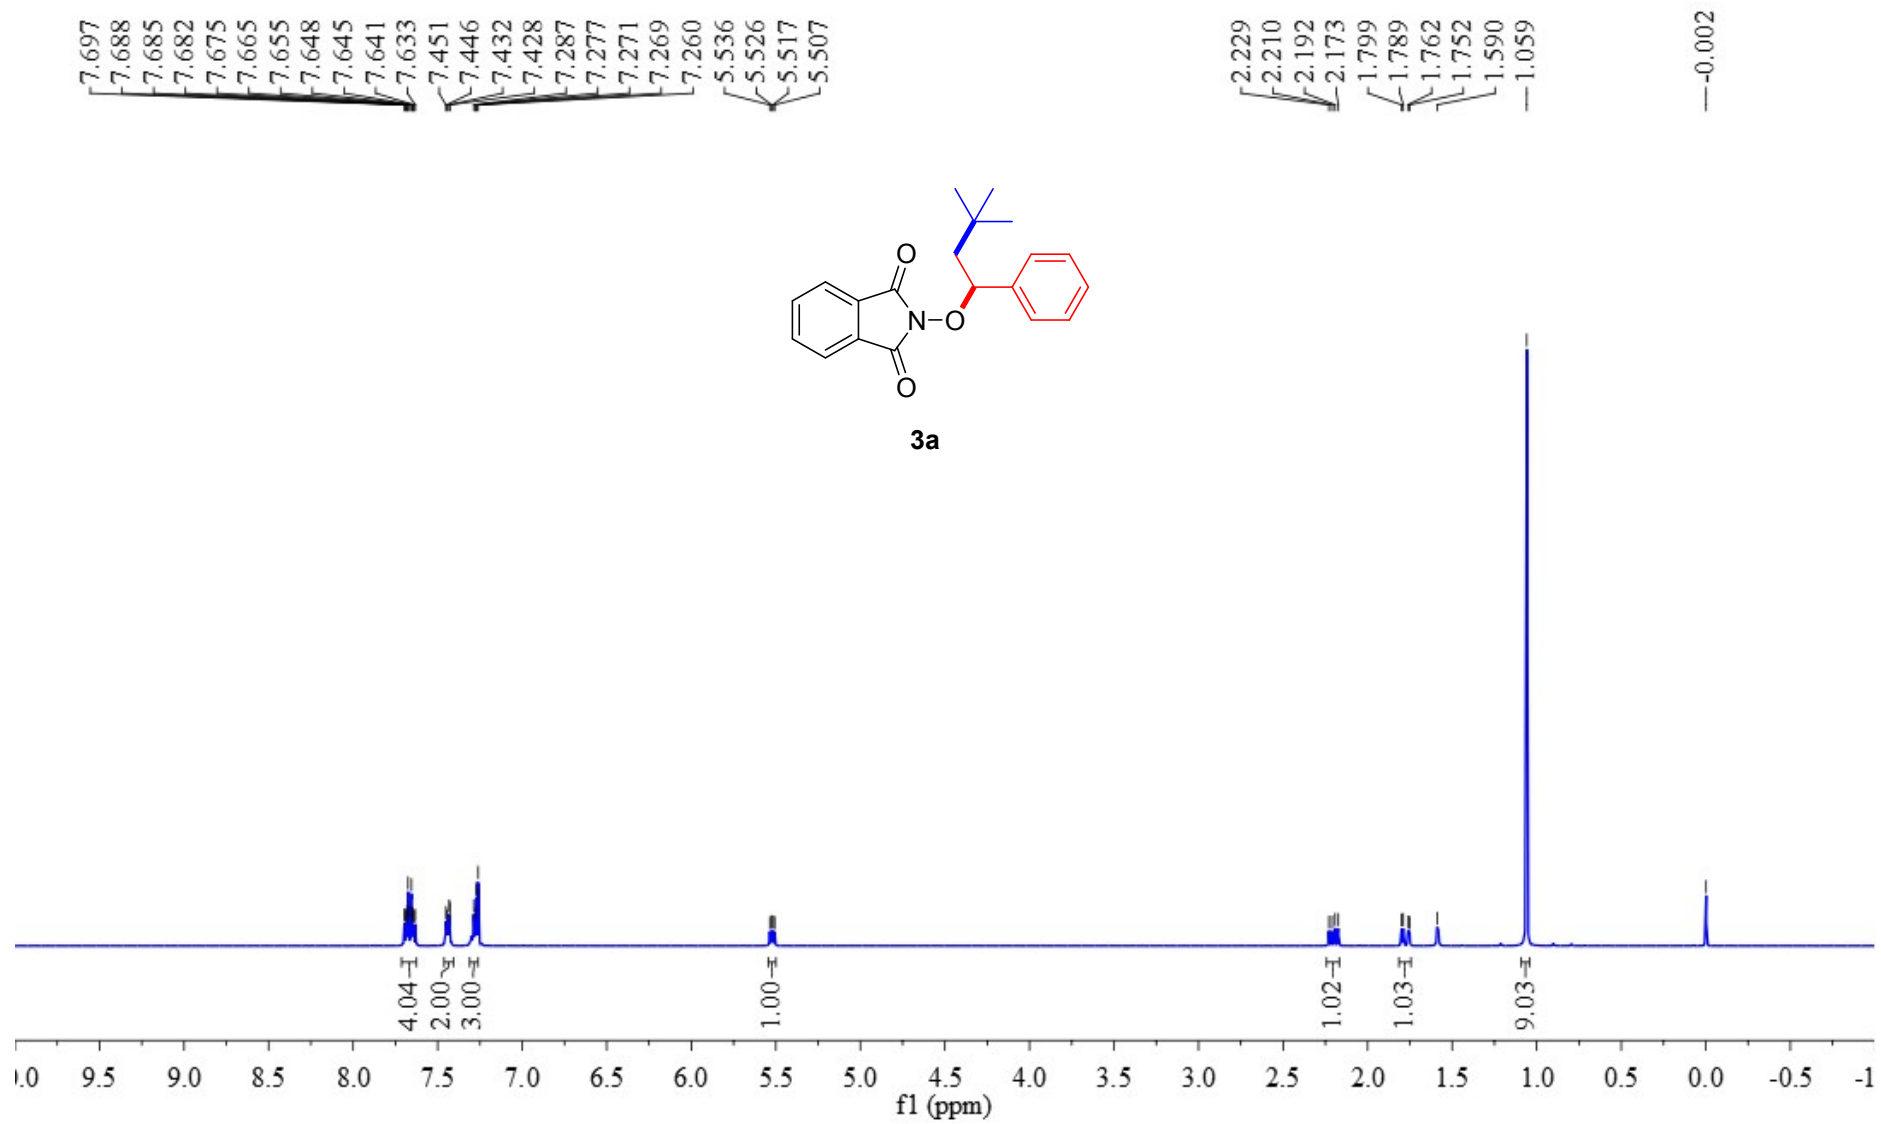

S10

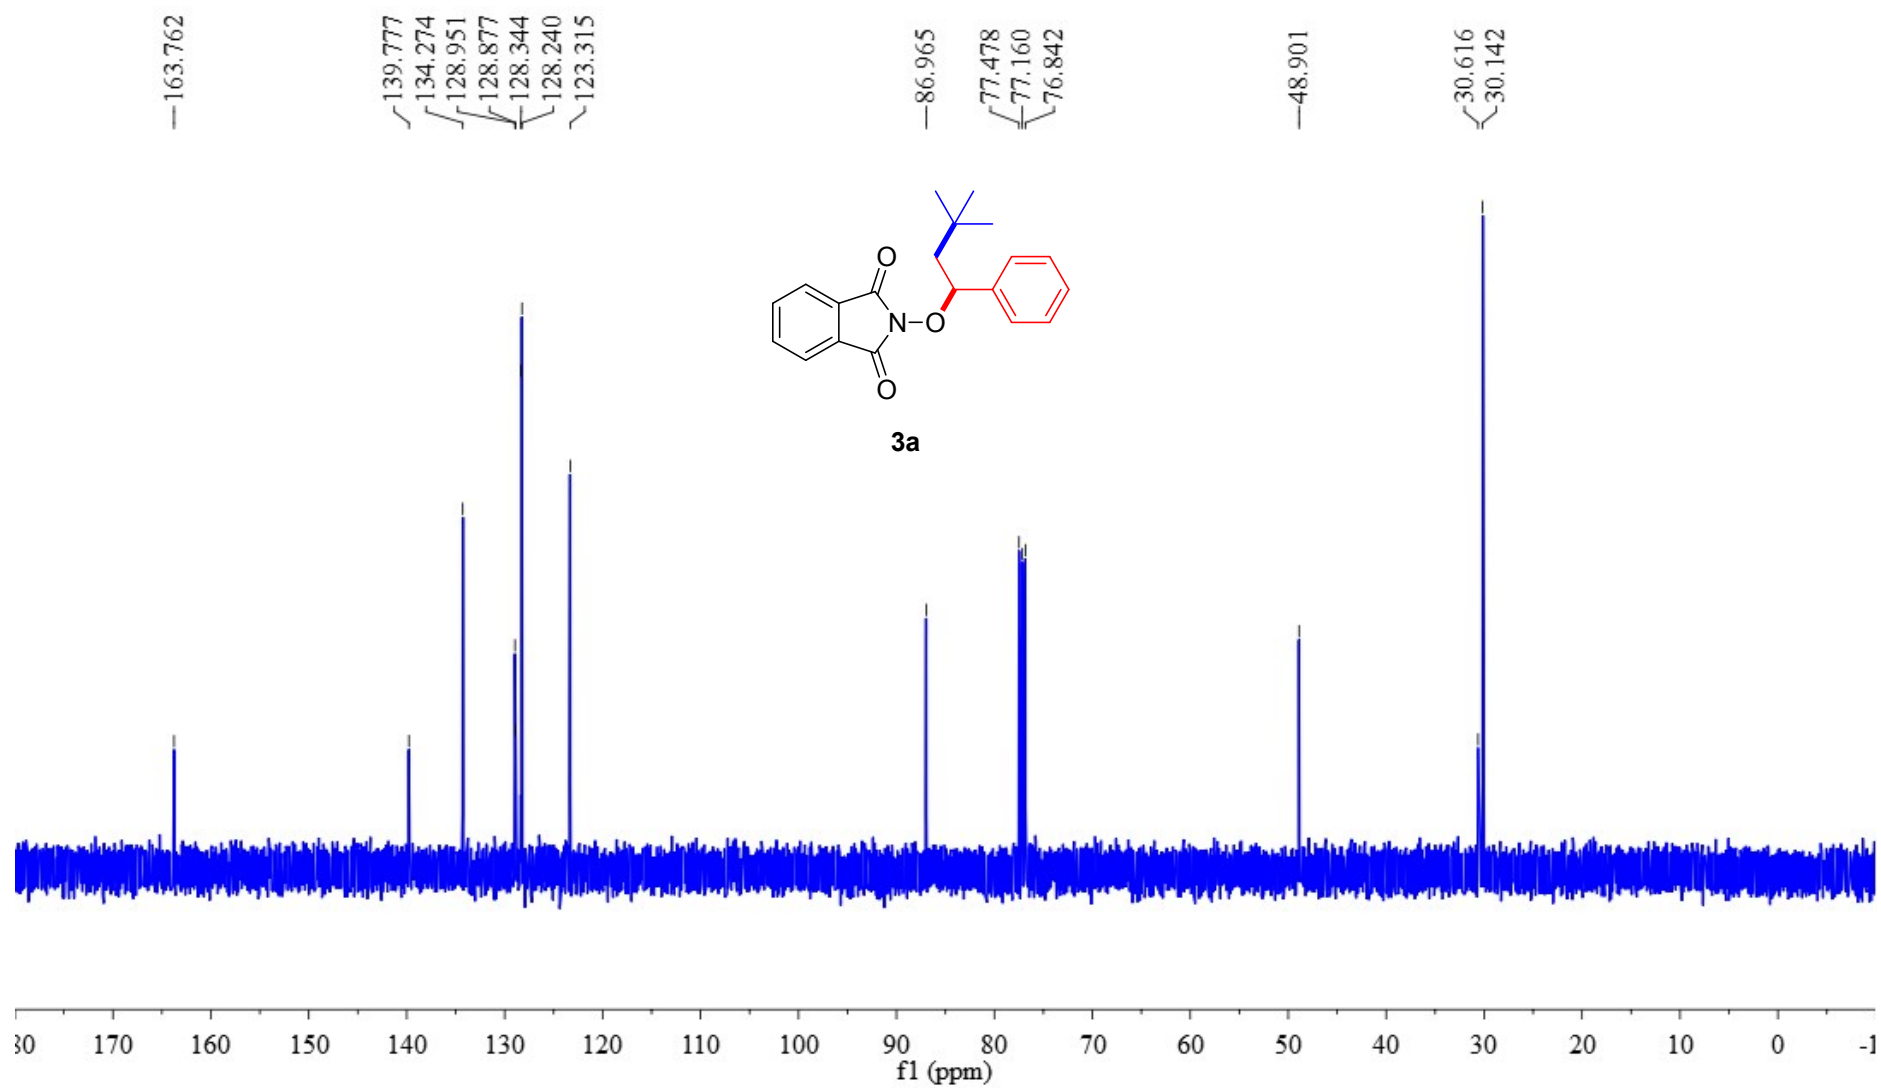

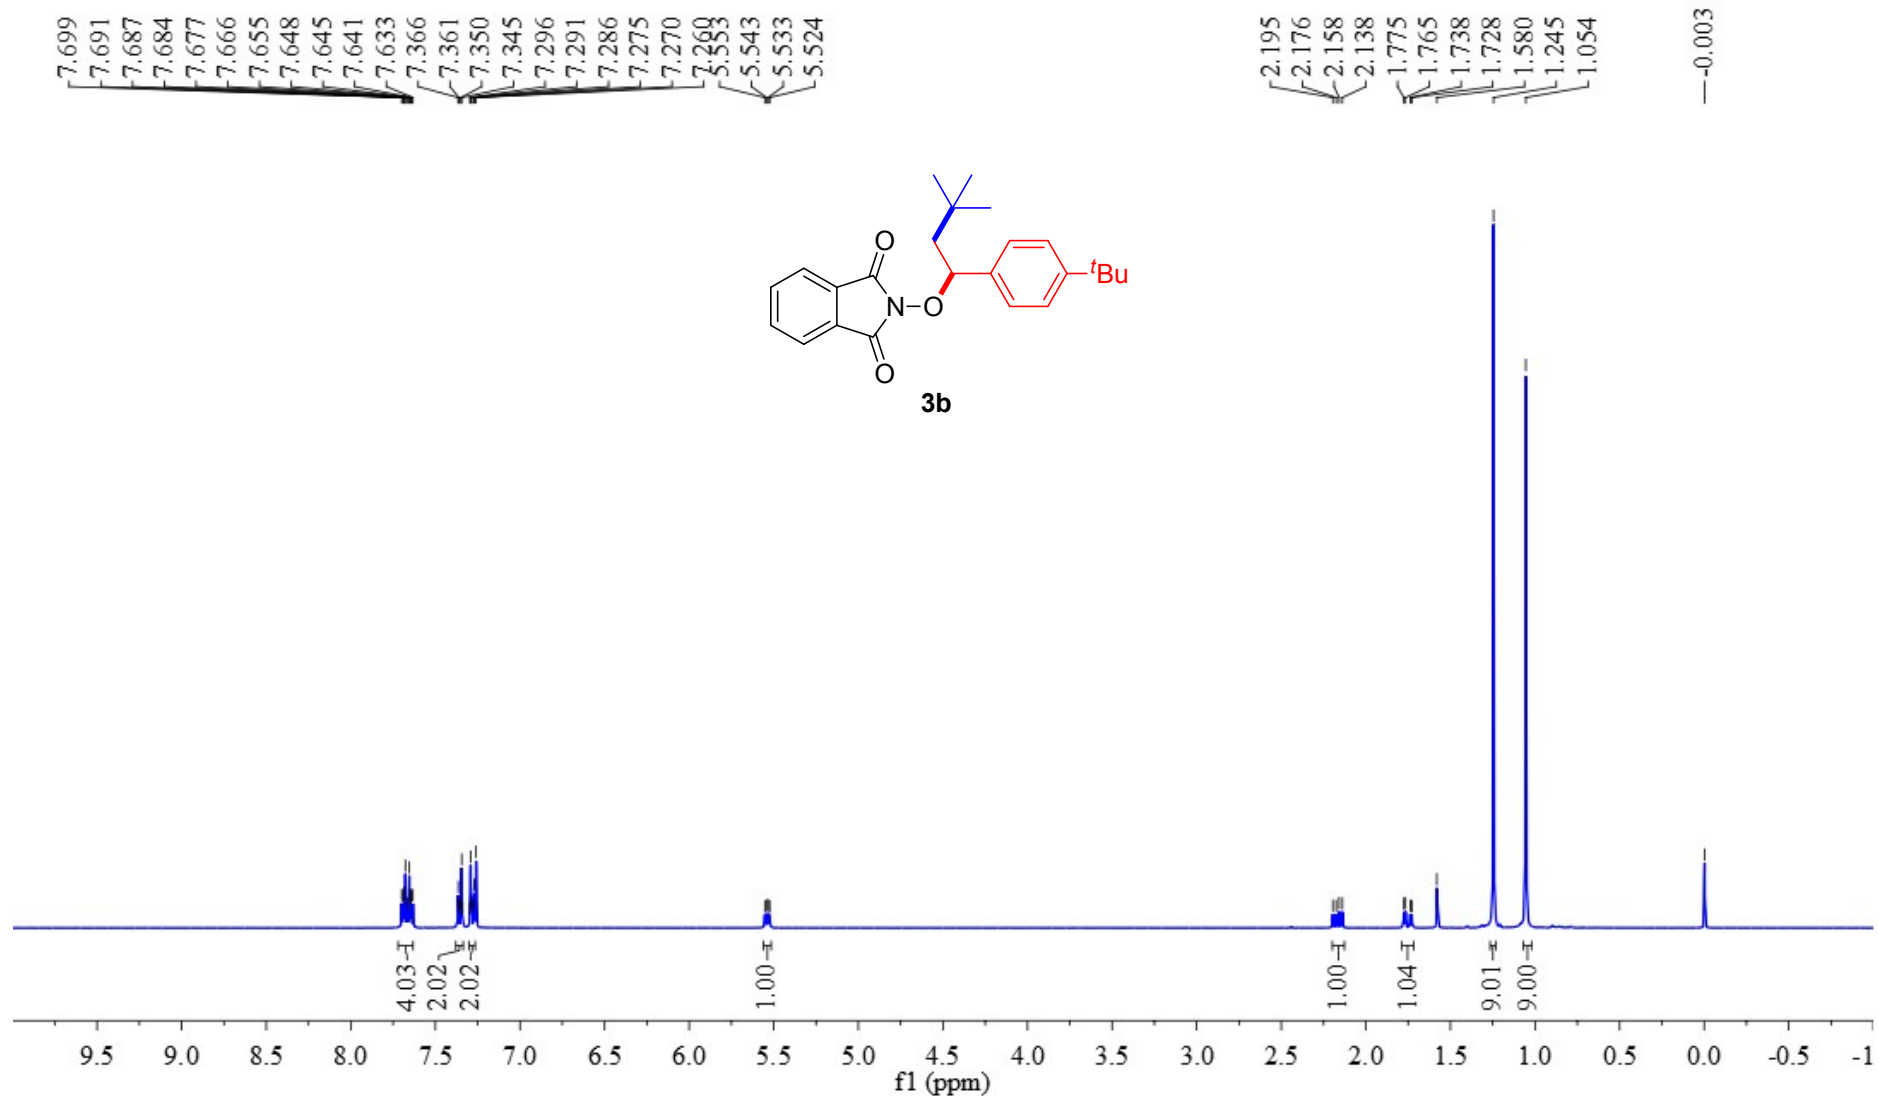

S12

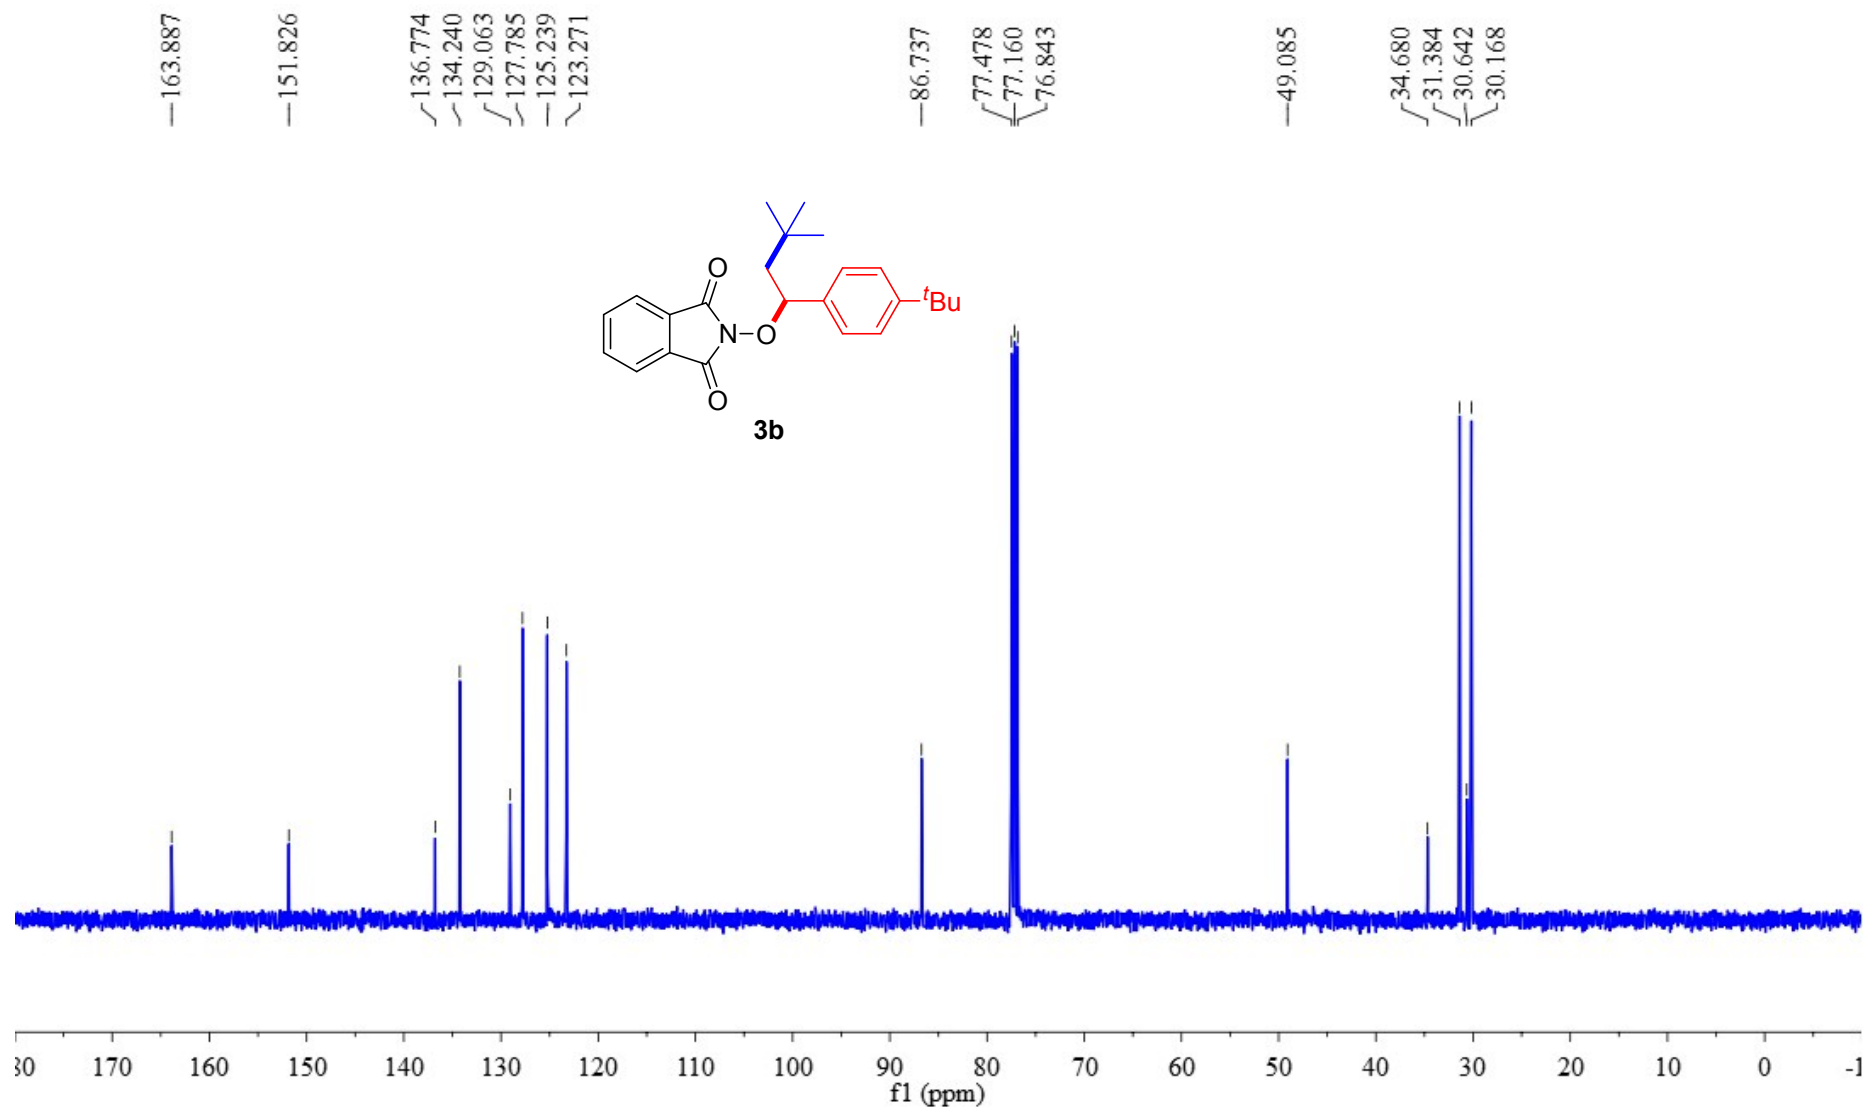

S13

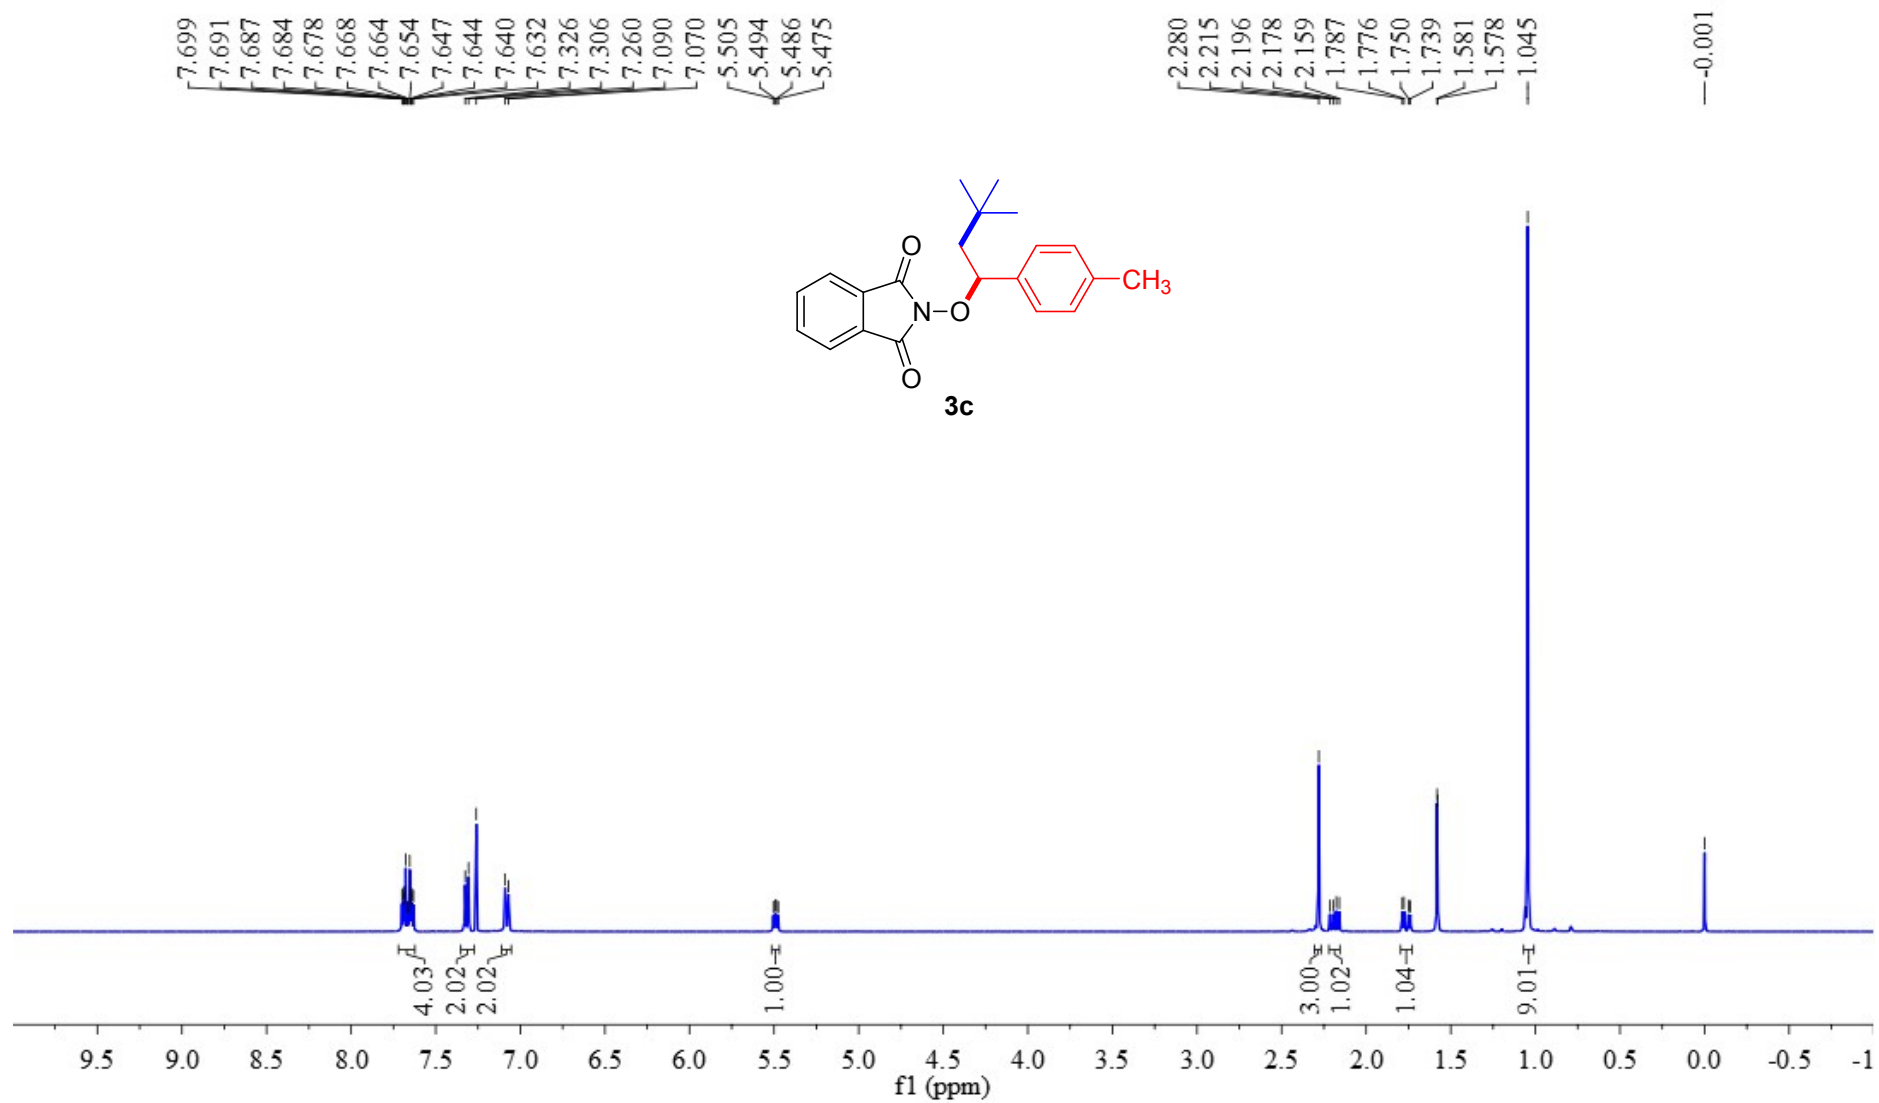

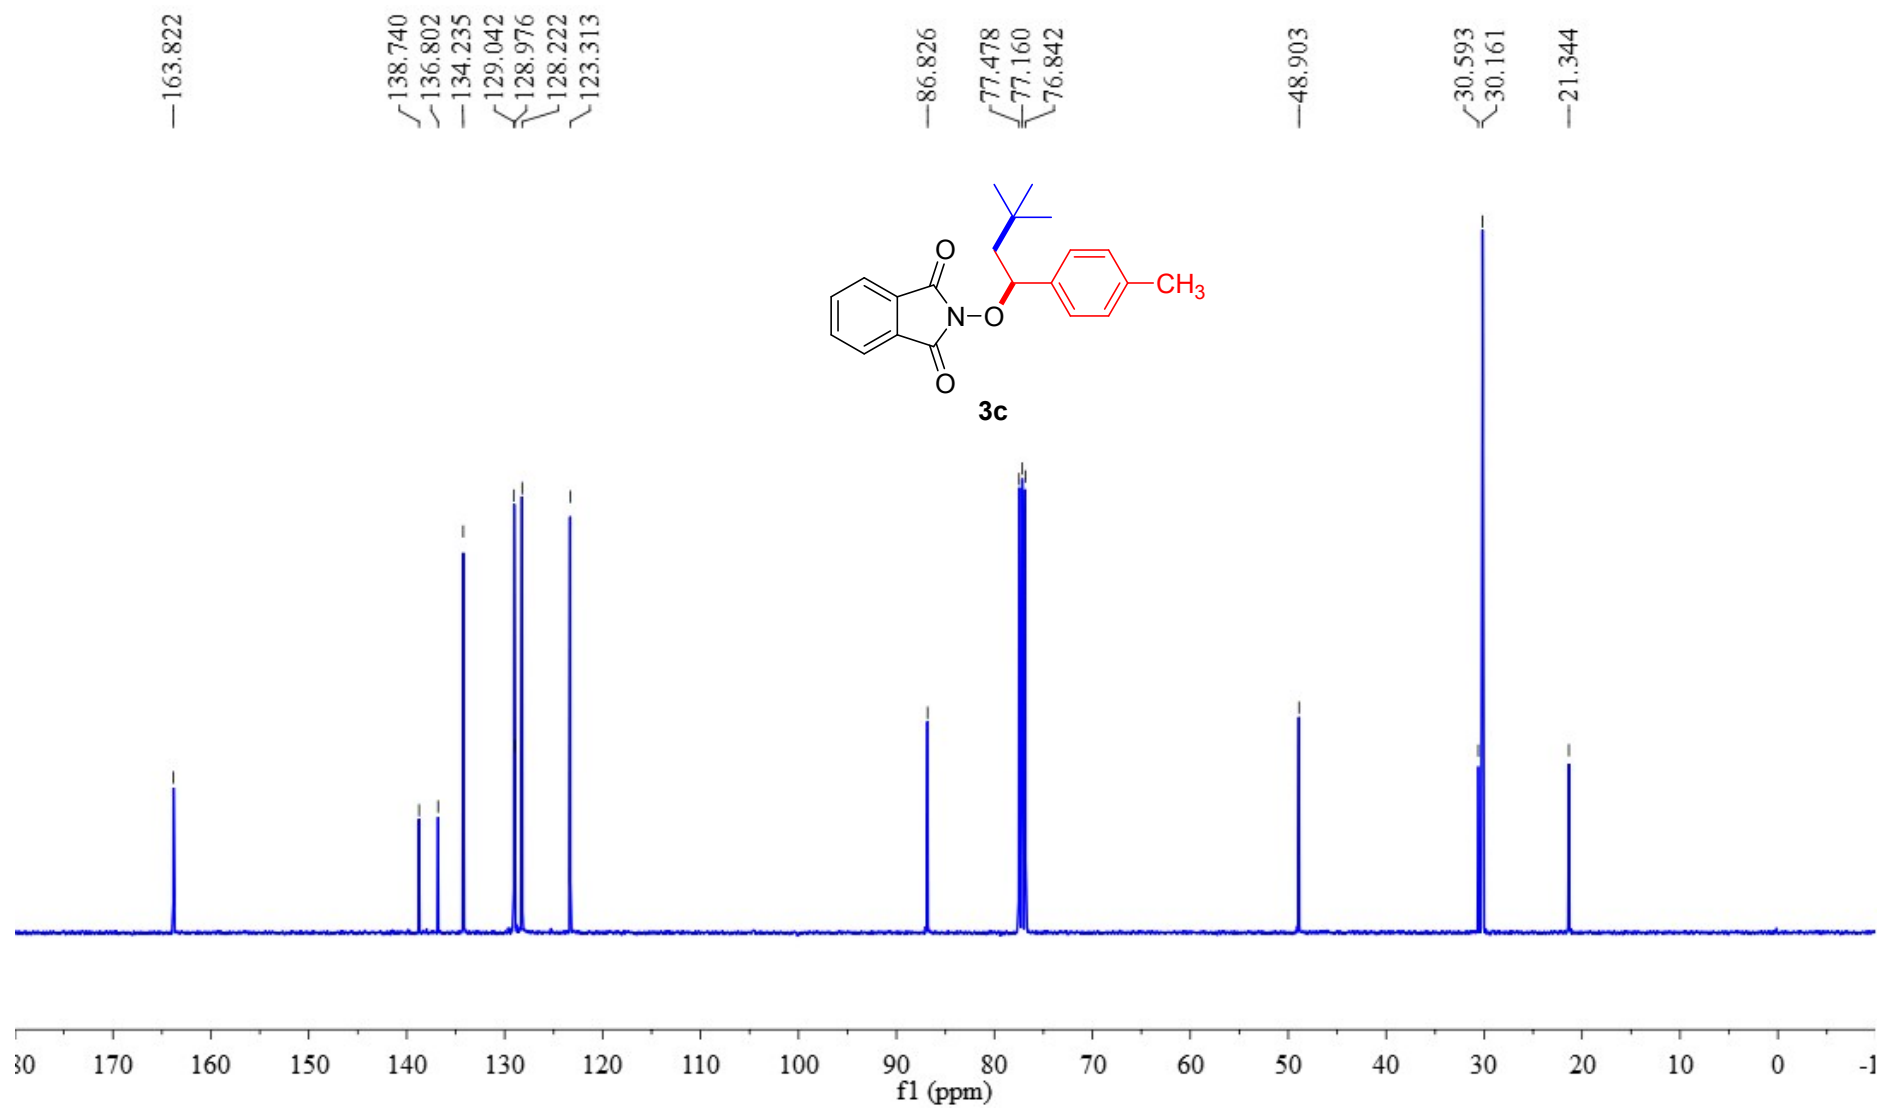

s15



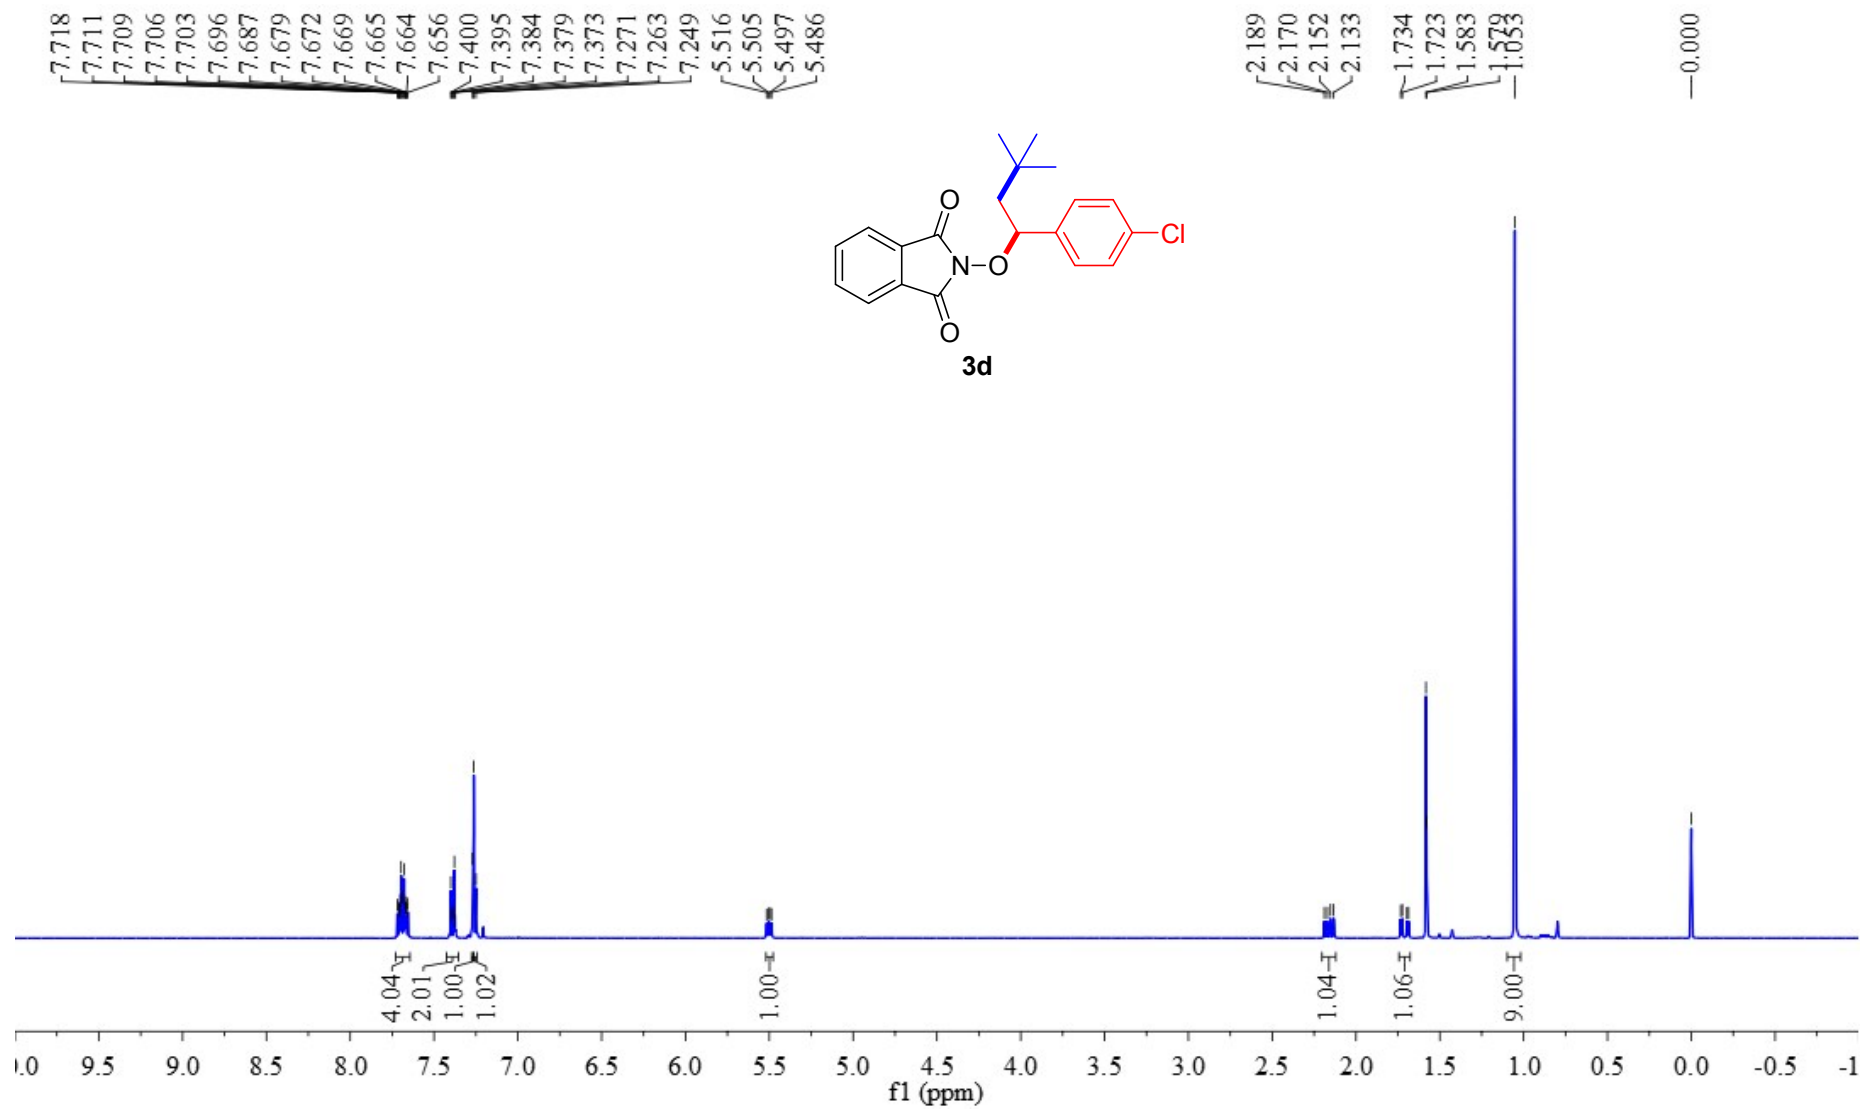

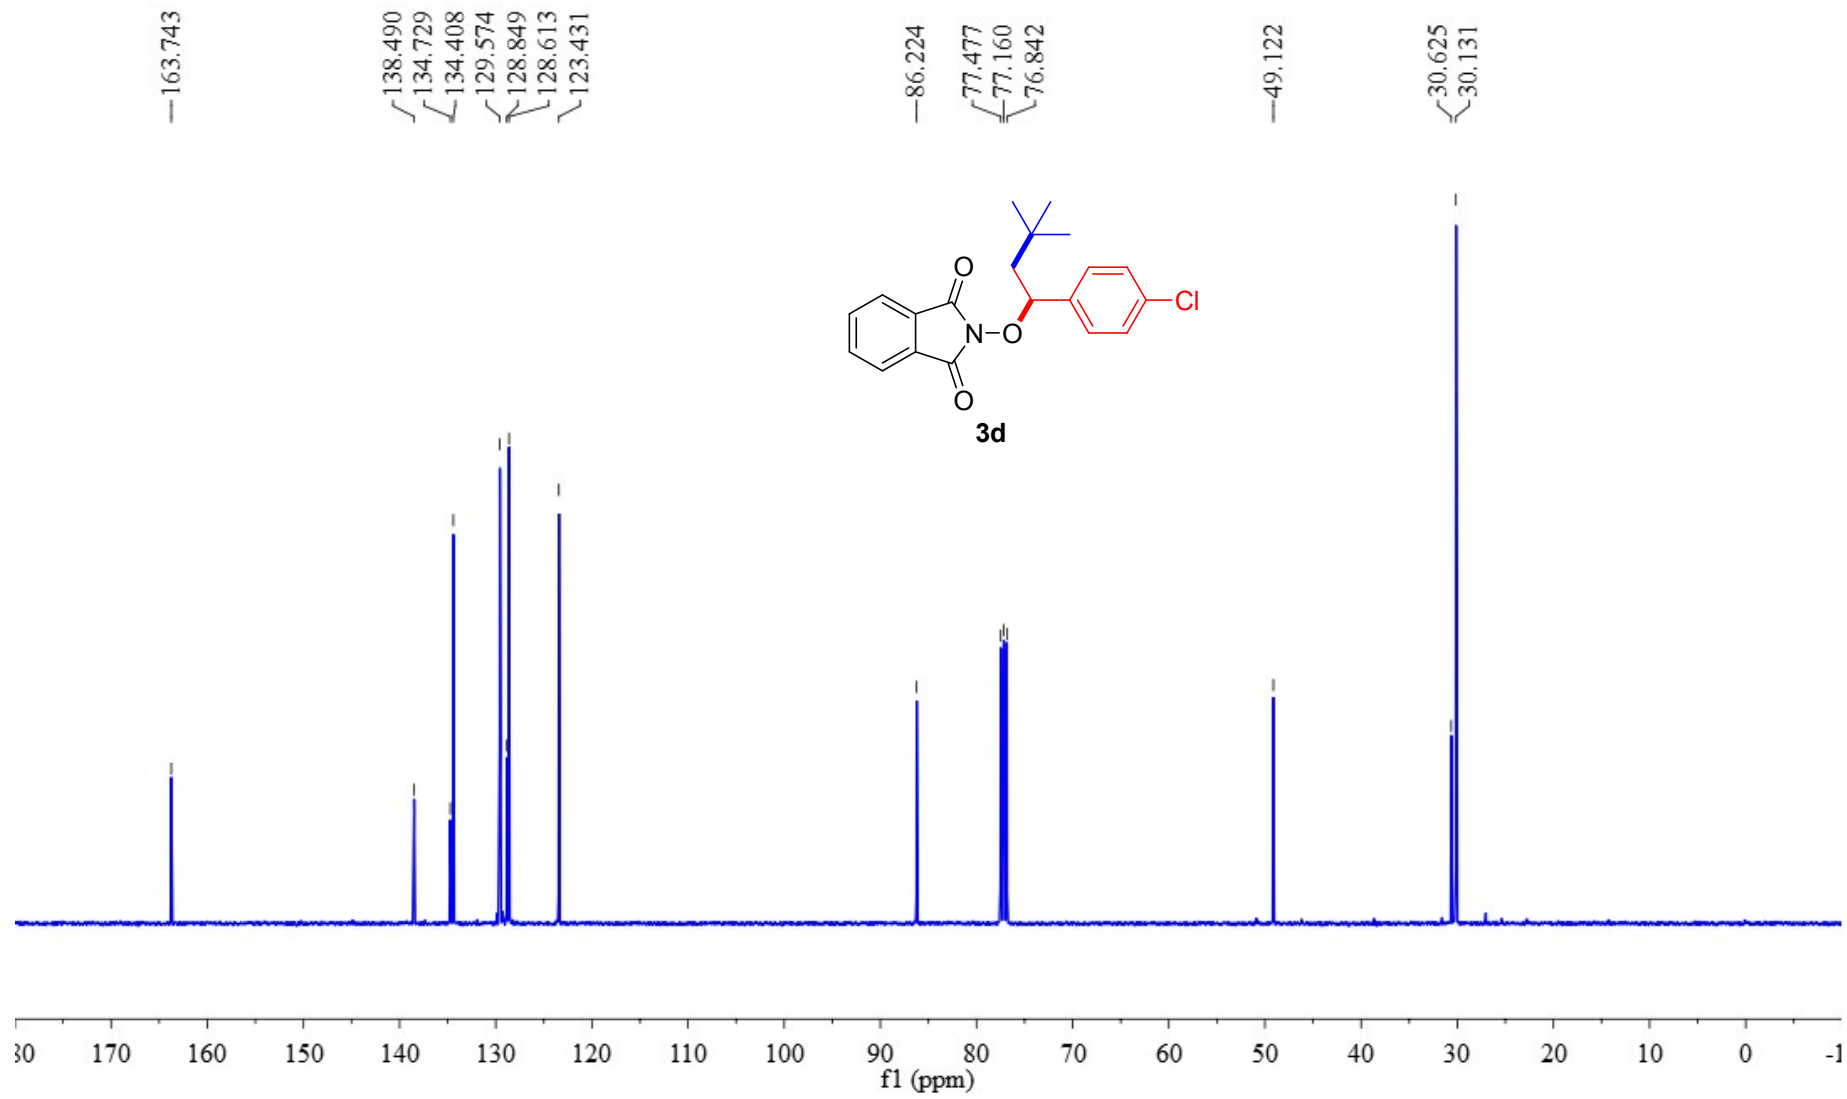

S17

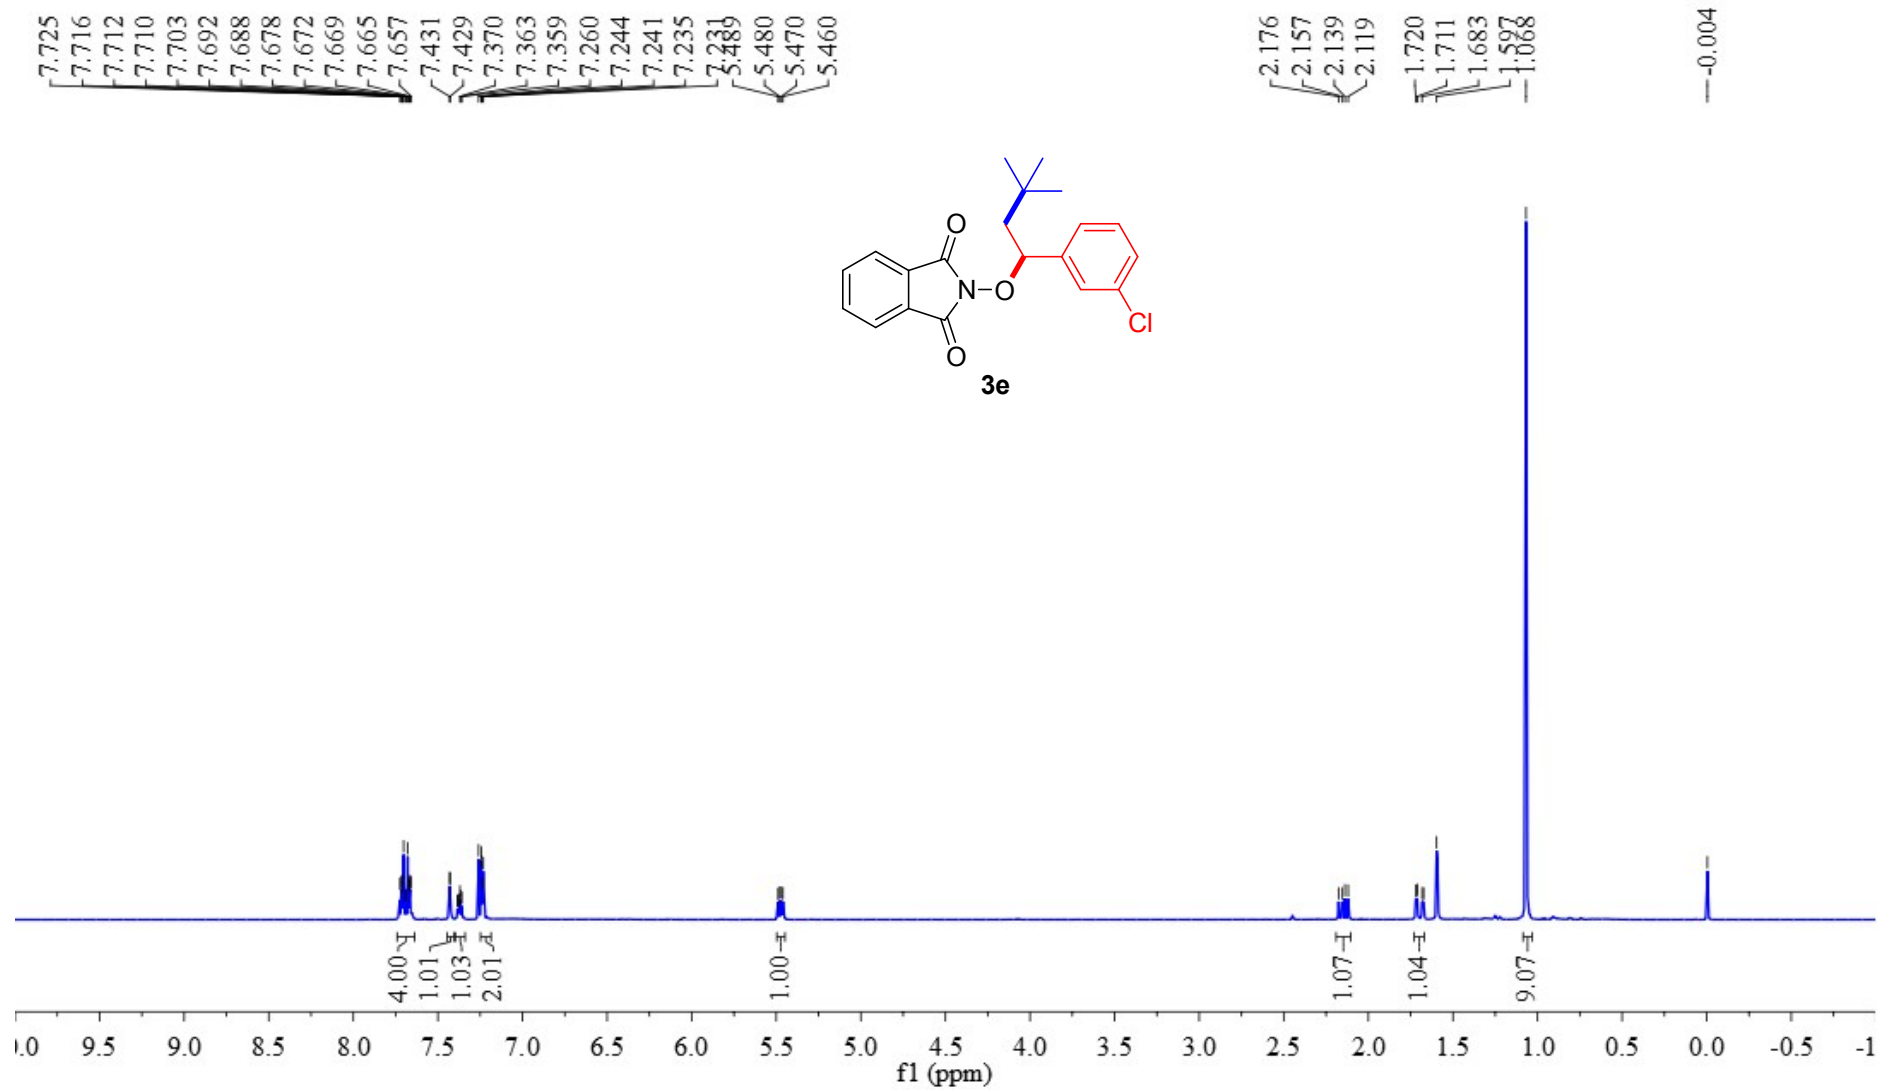

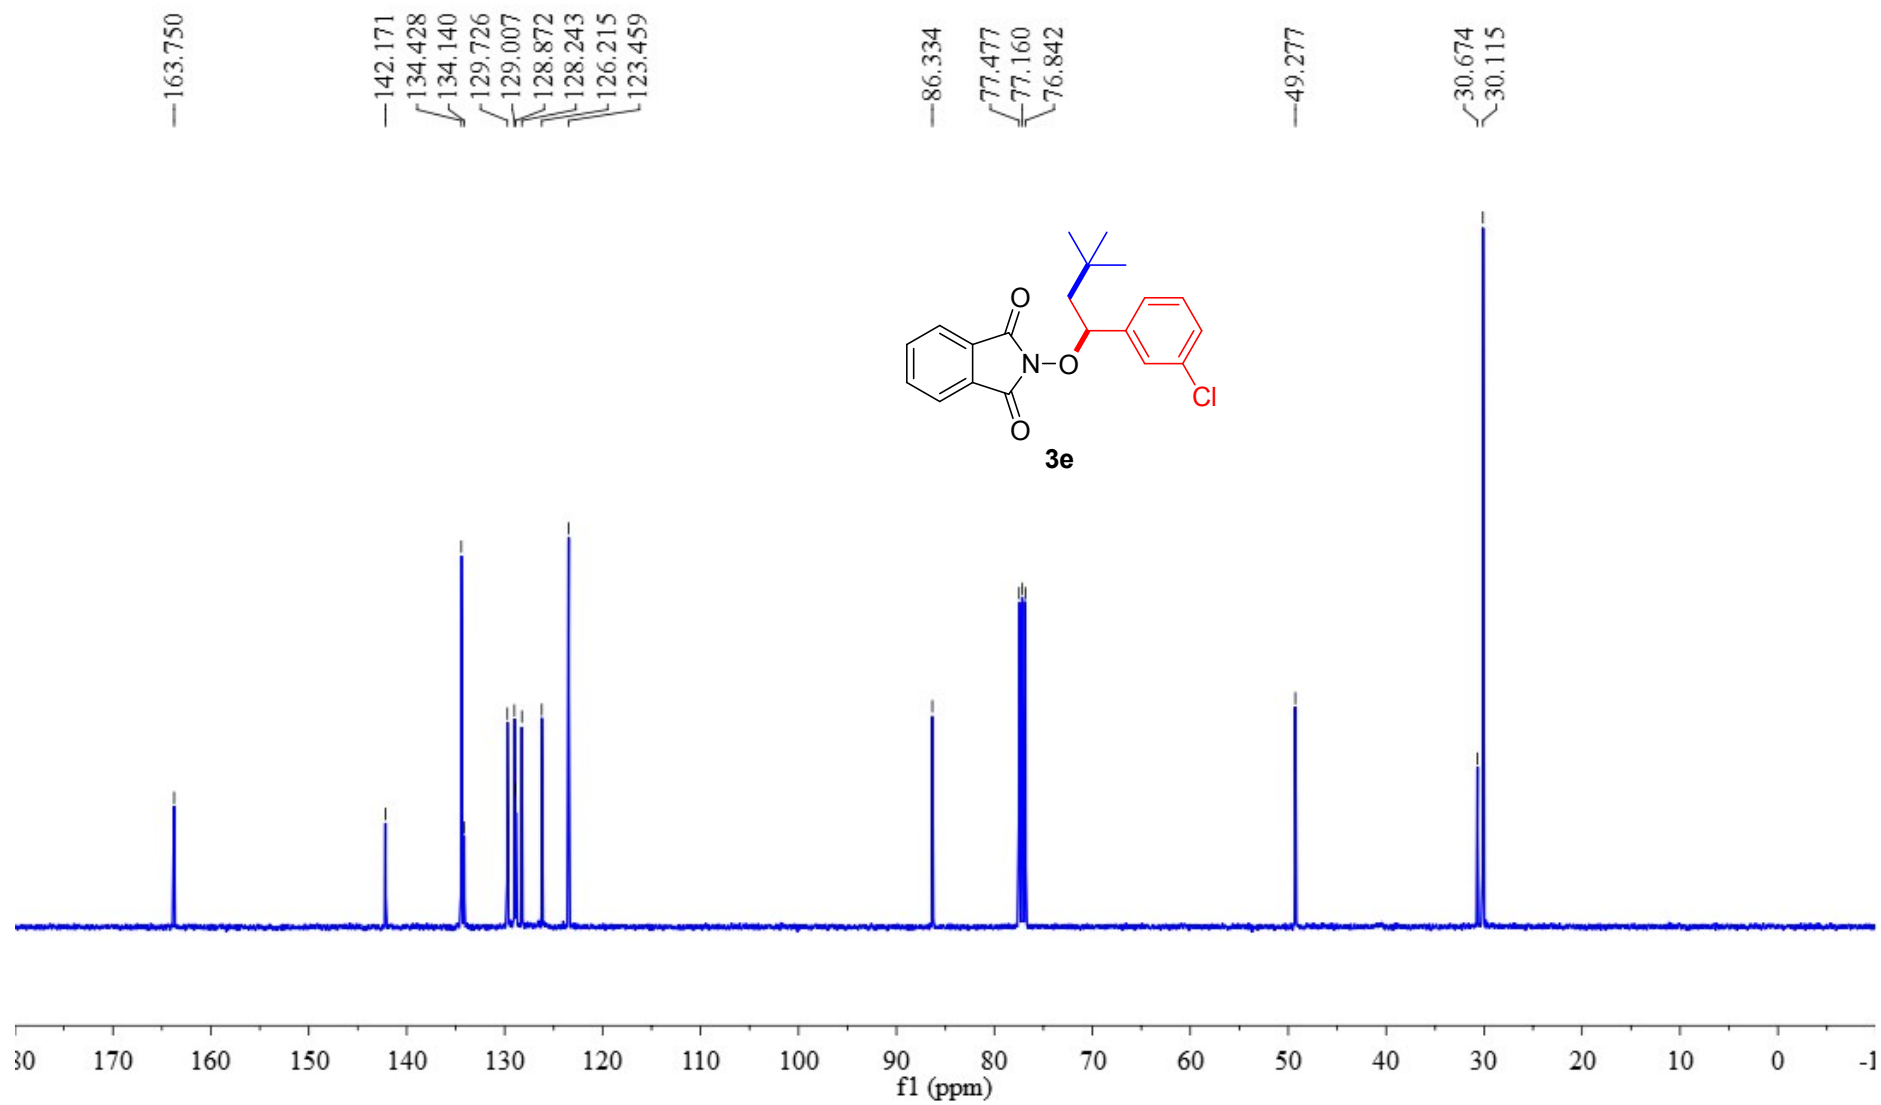

S19

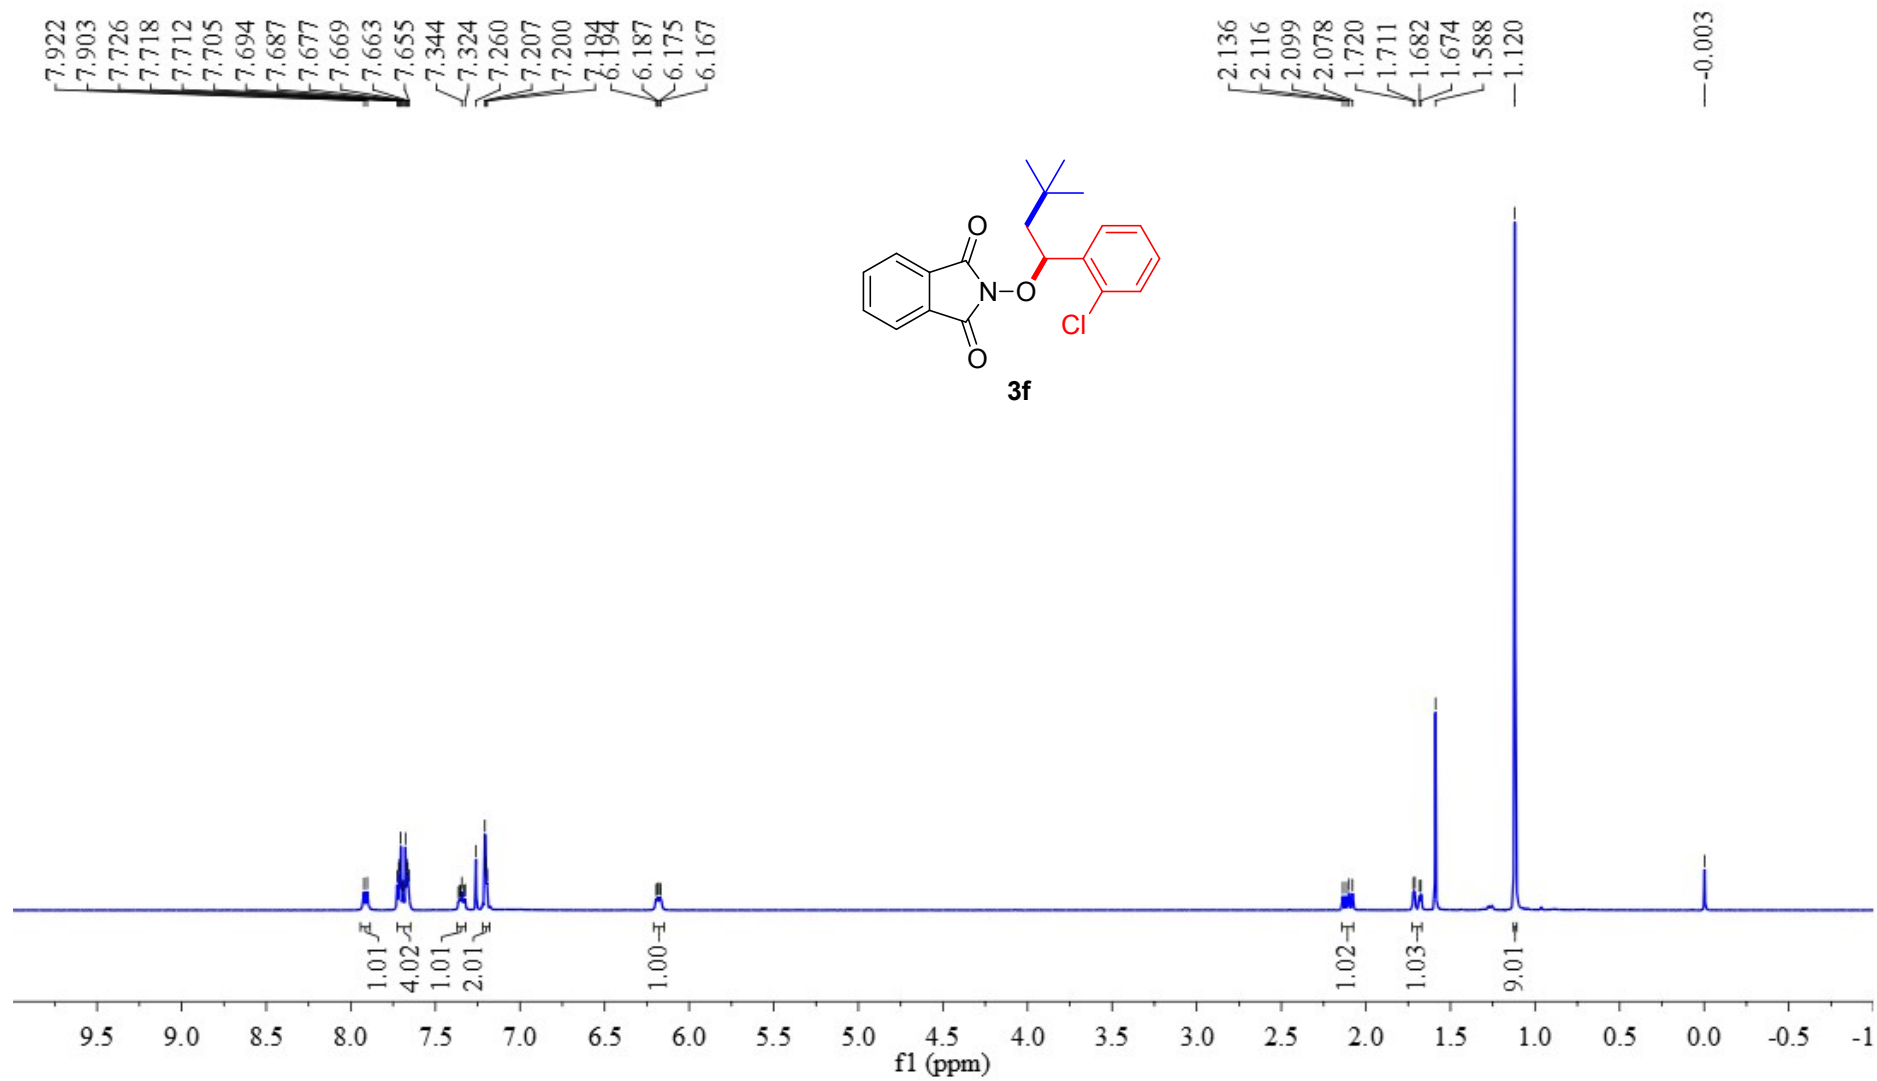

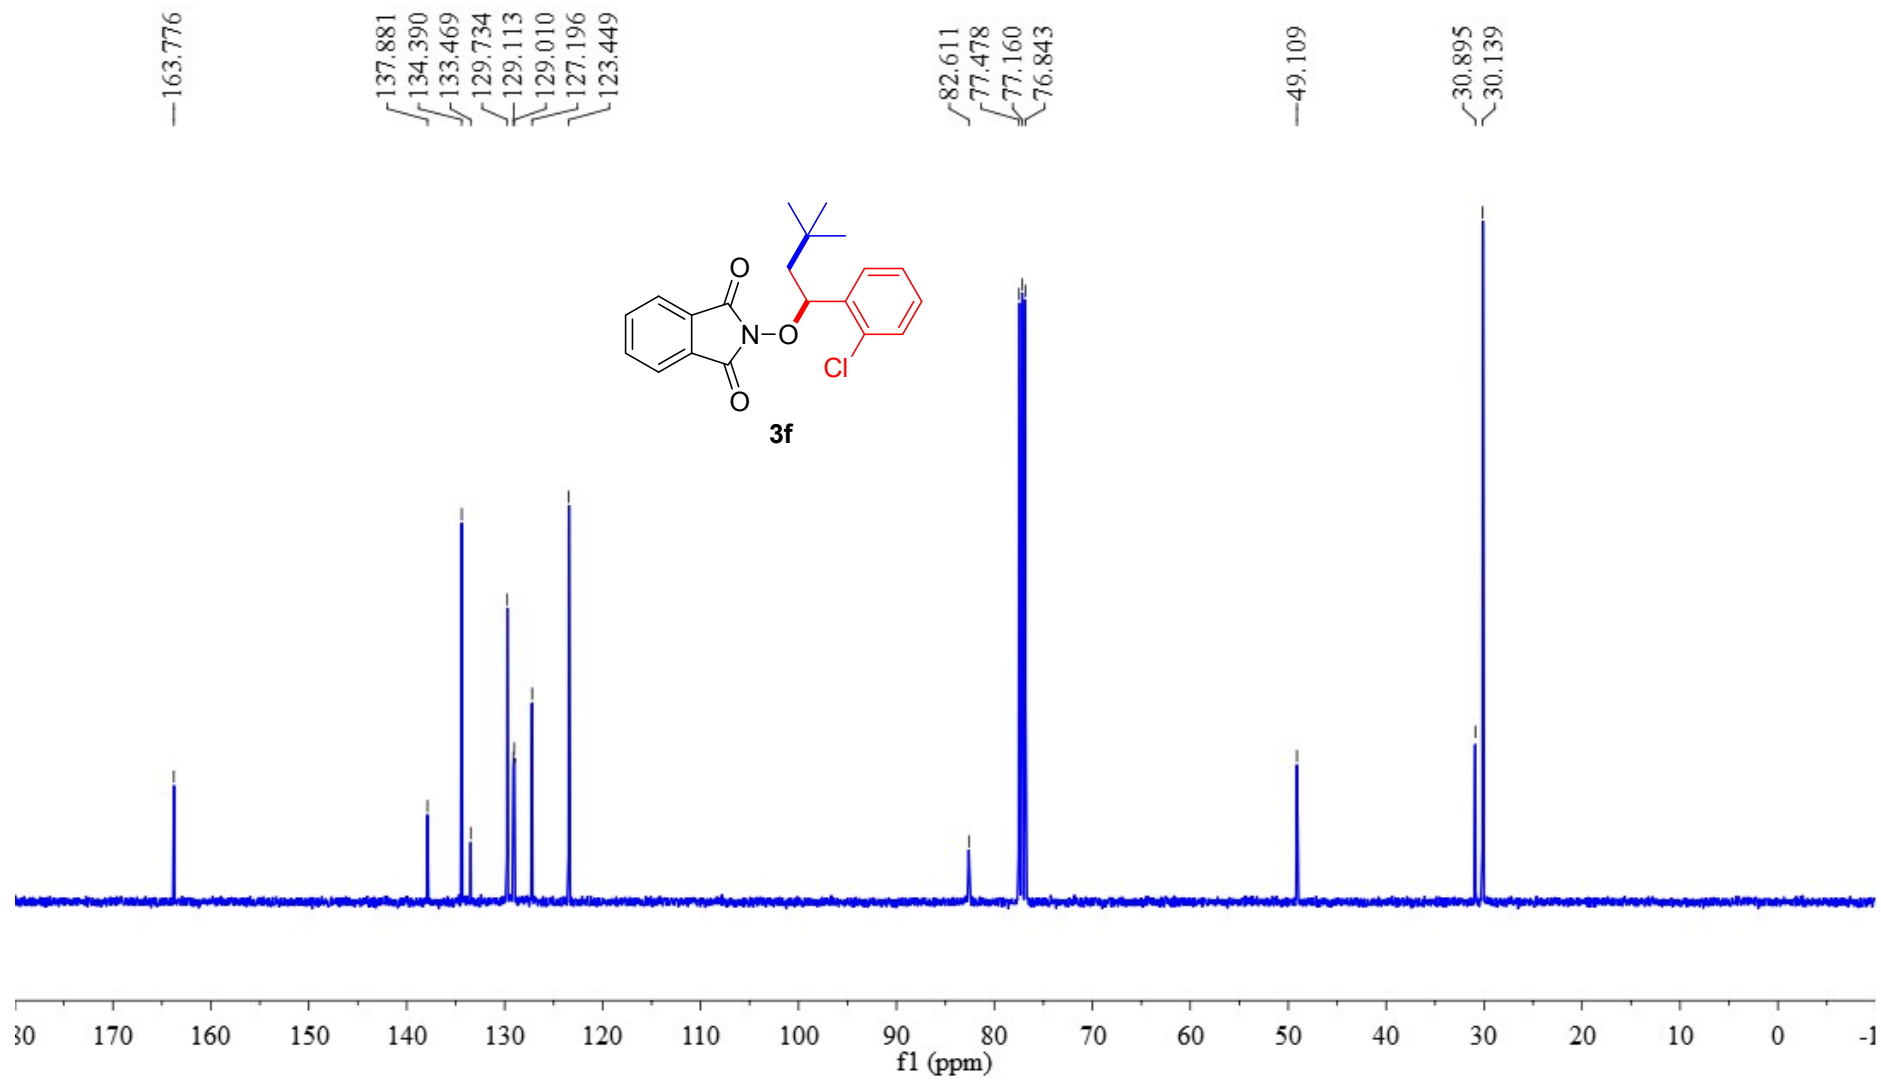

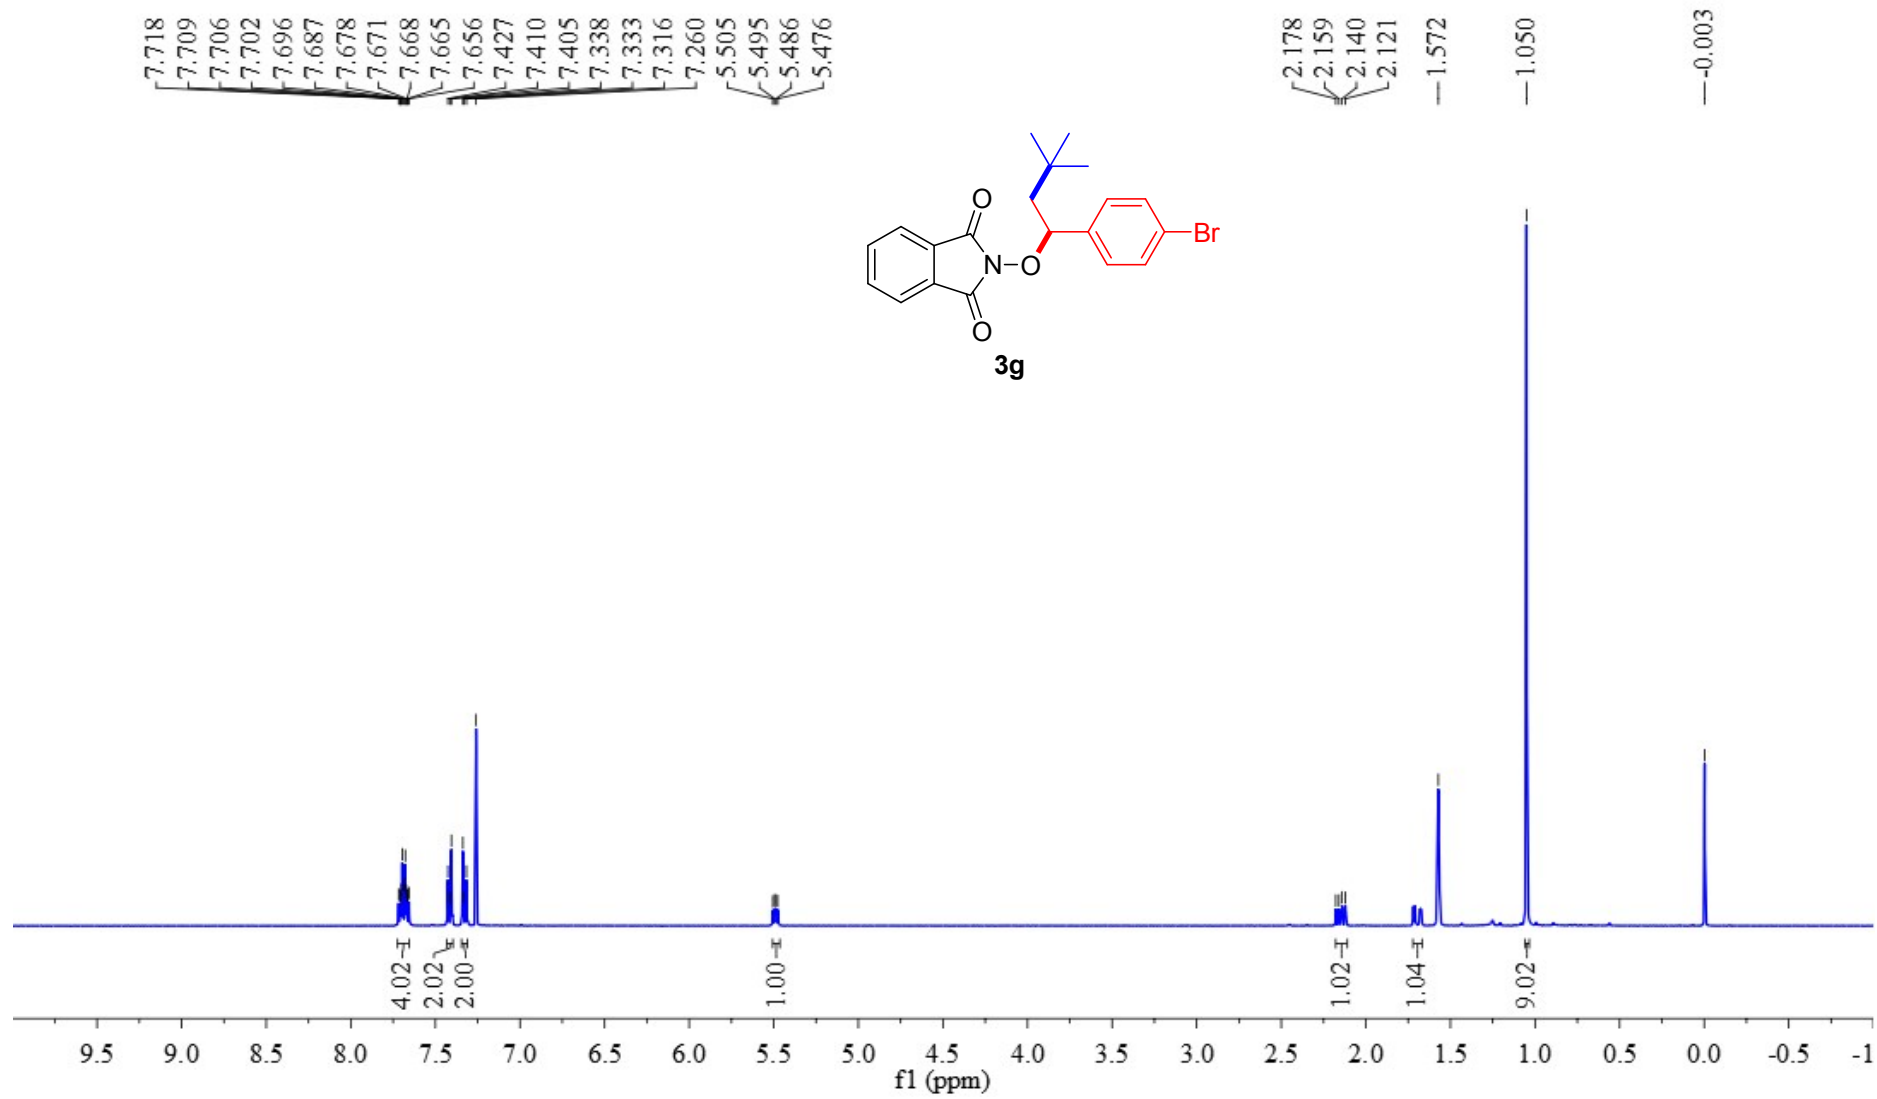

S22

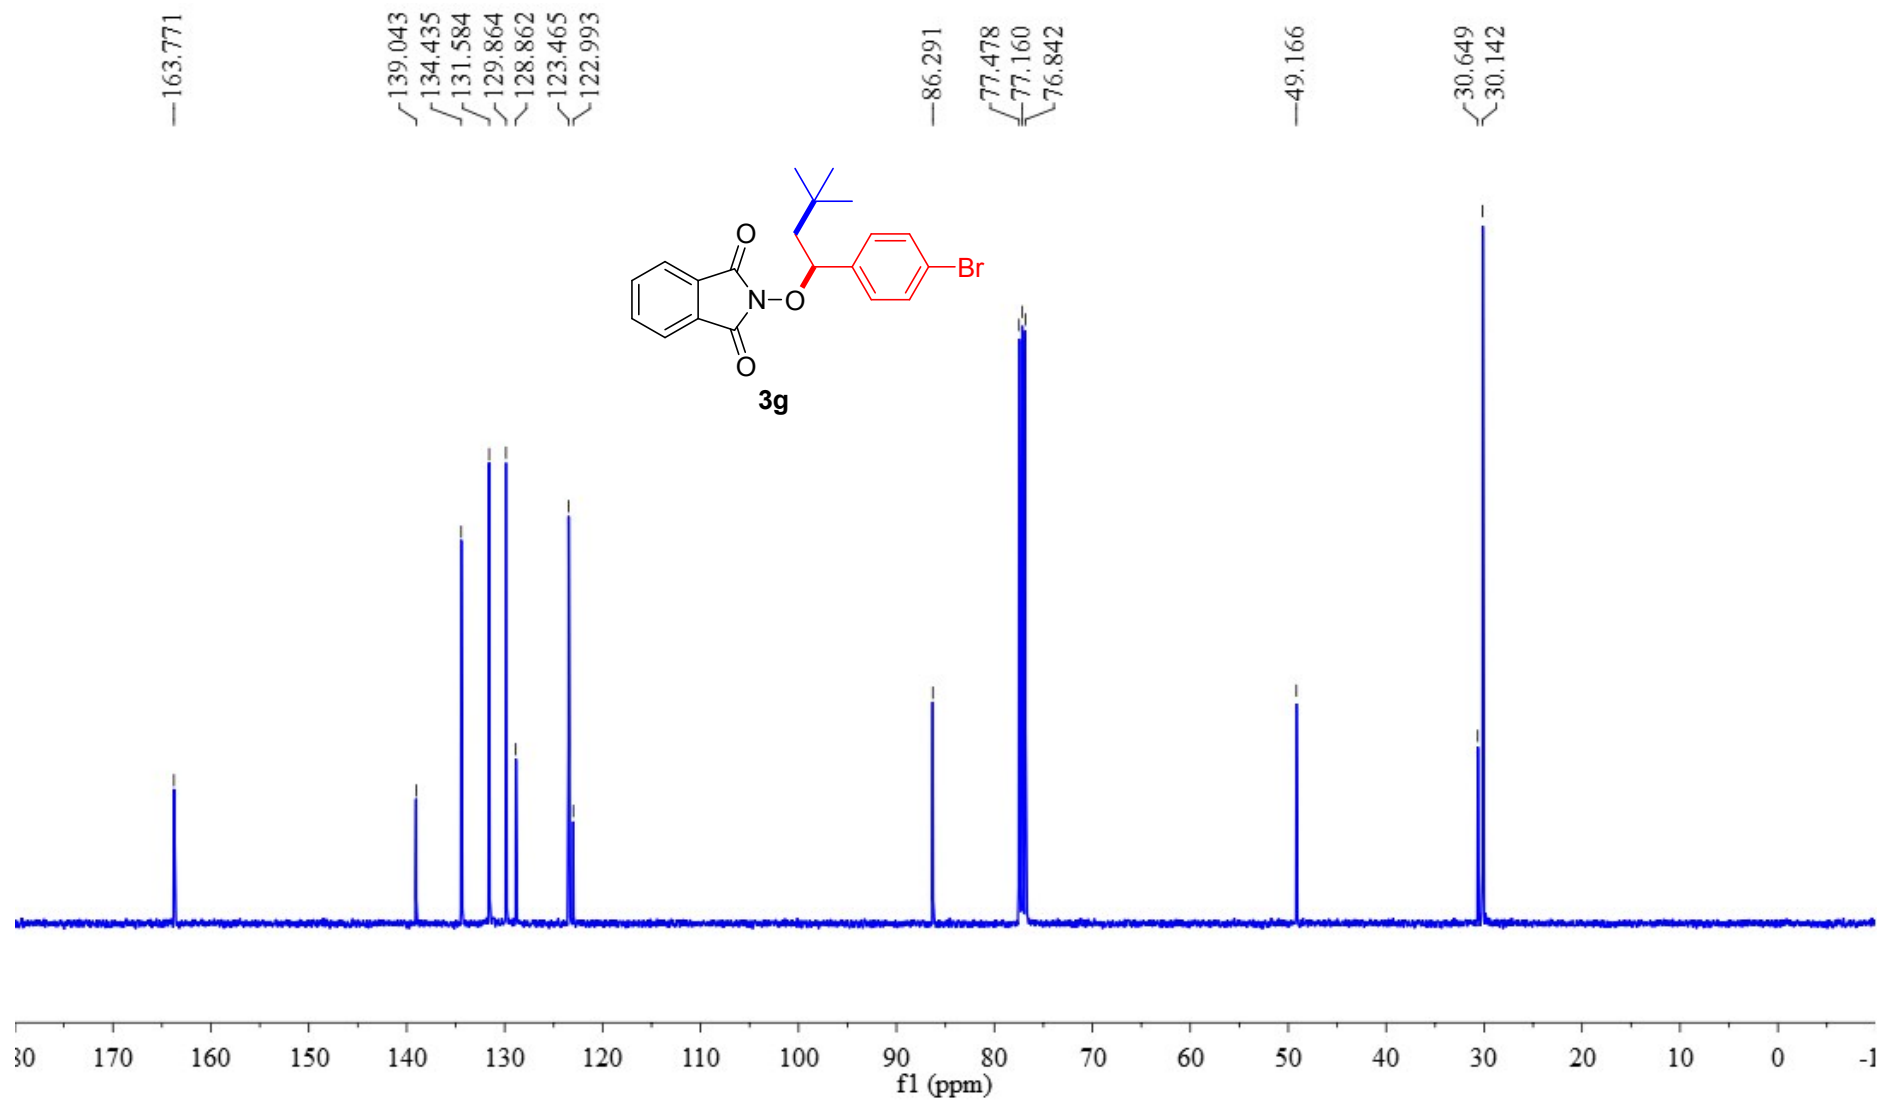

s23



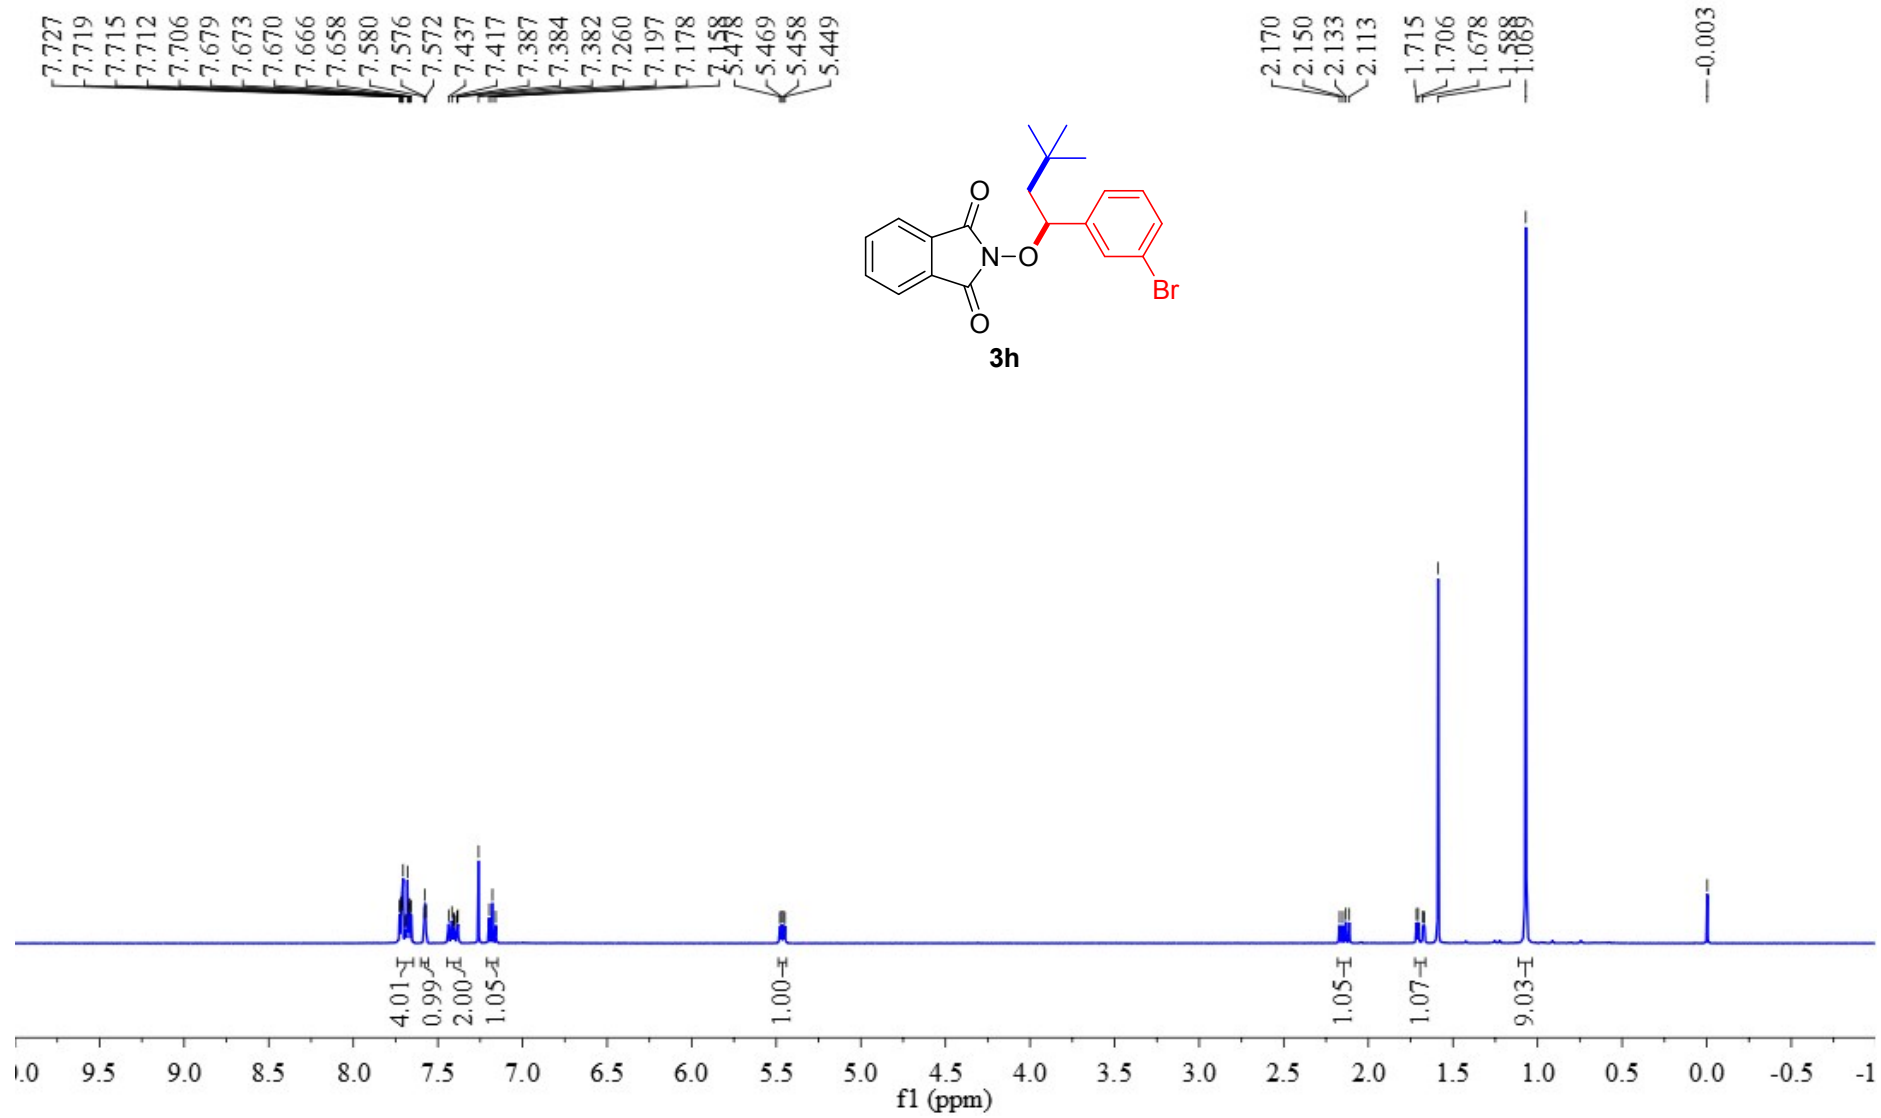

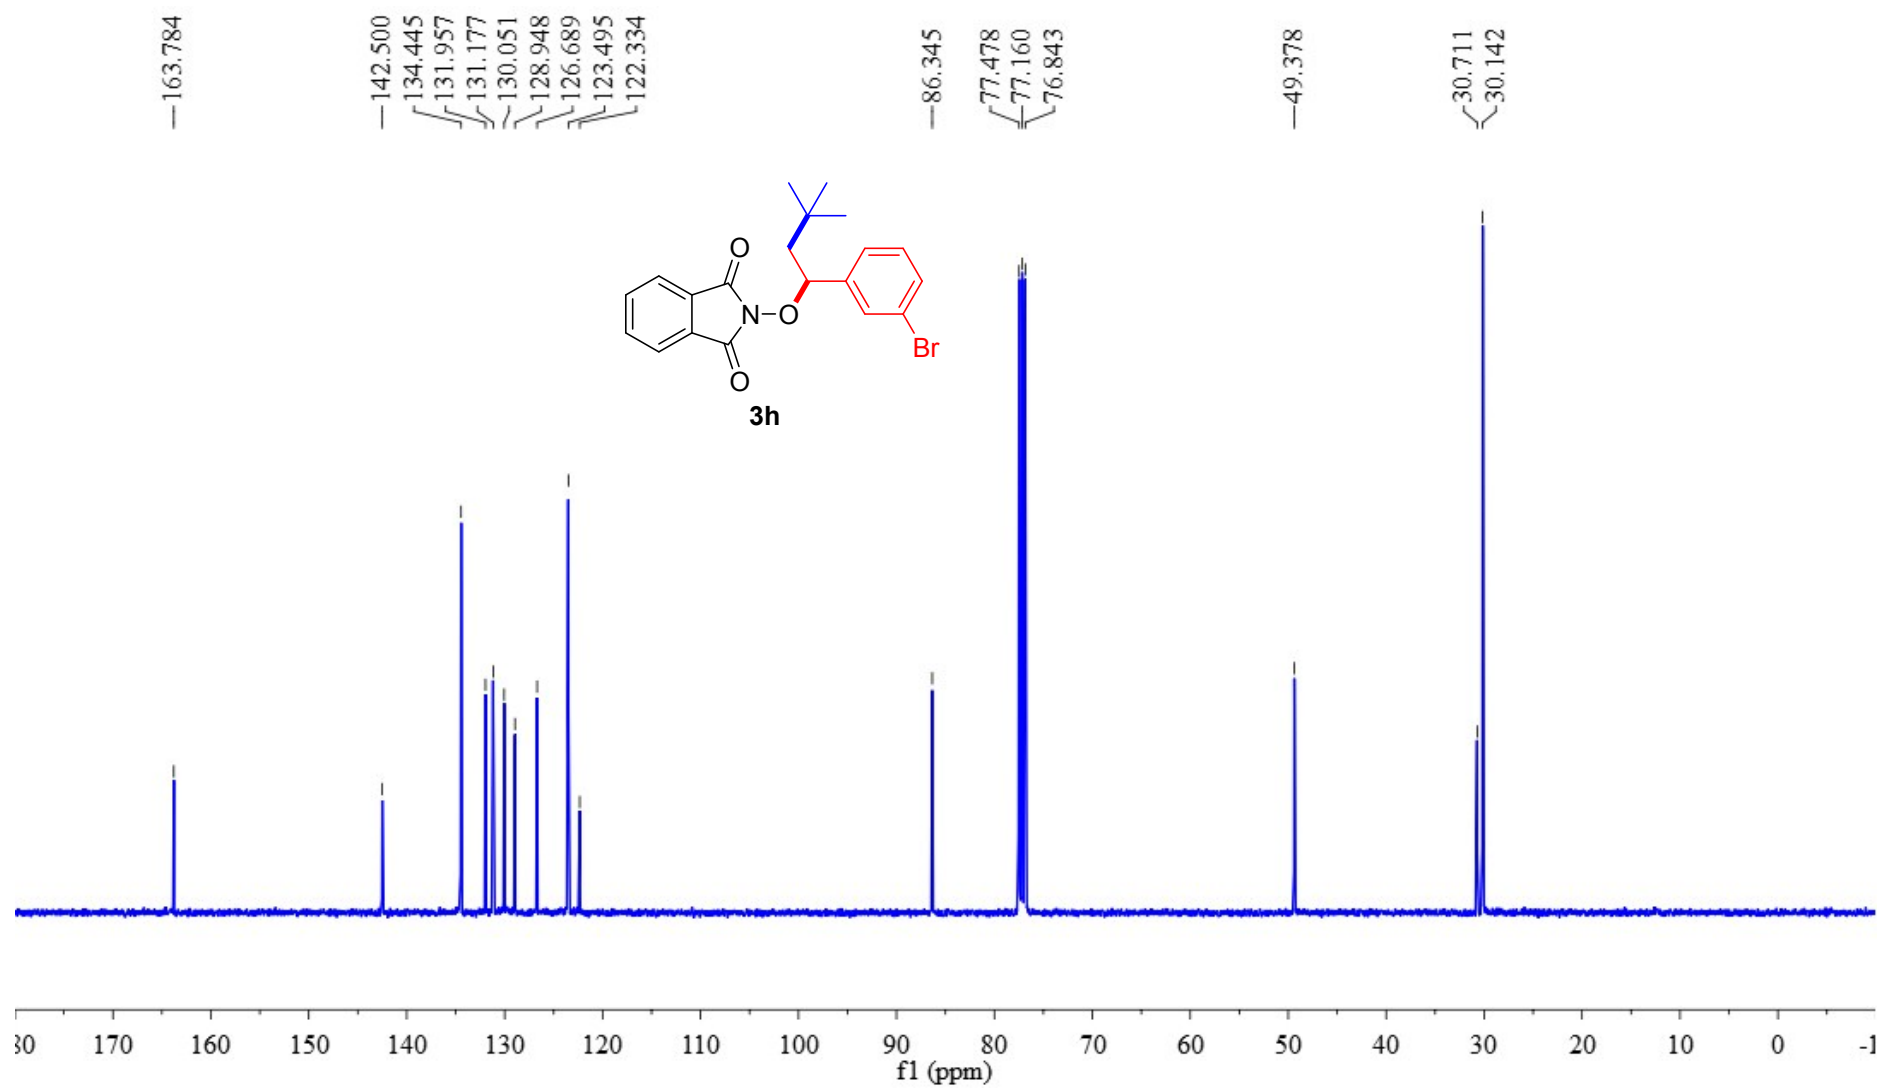

s25

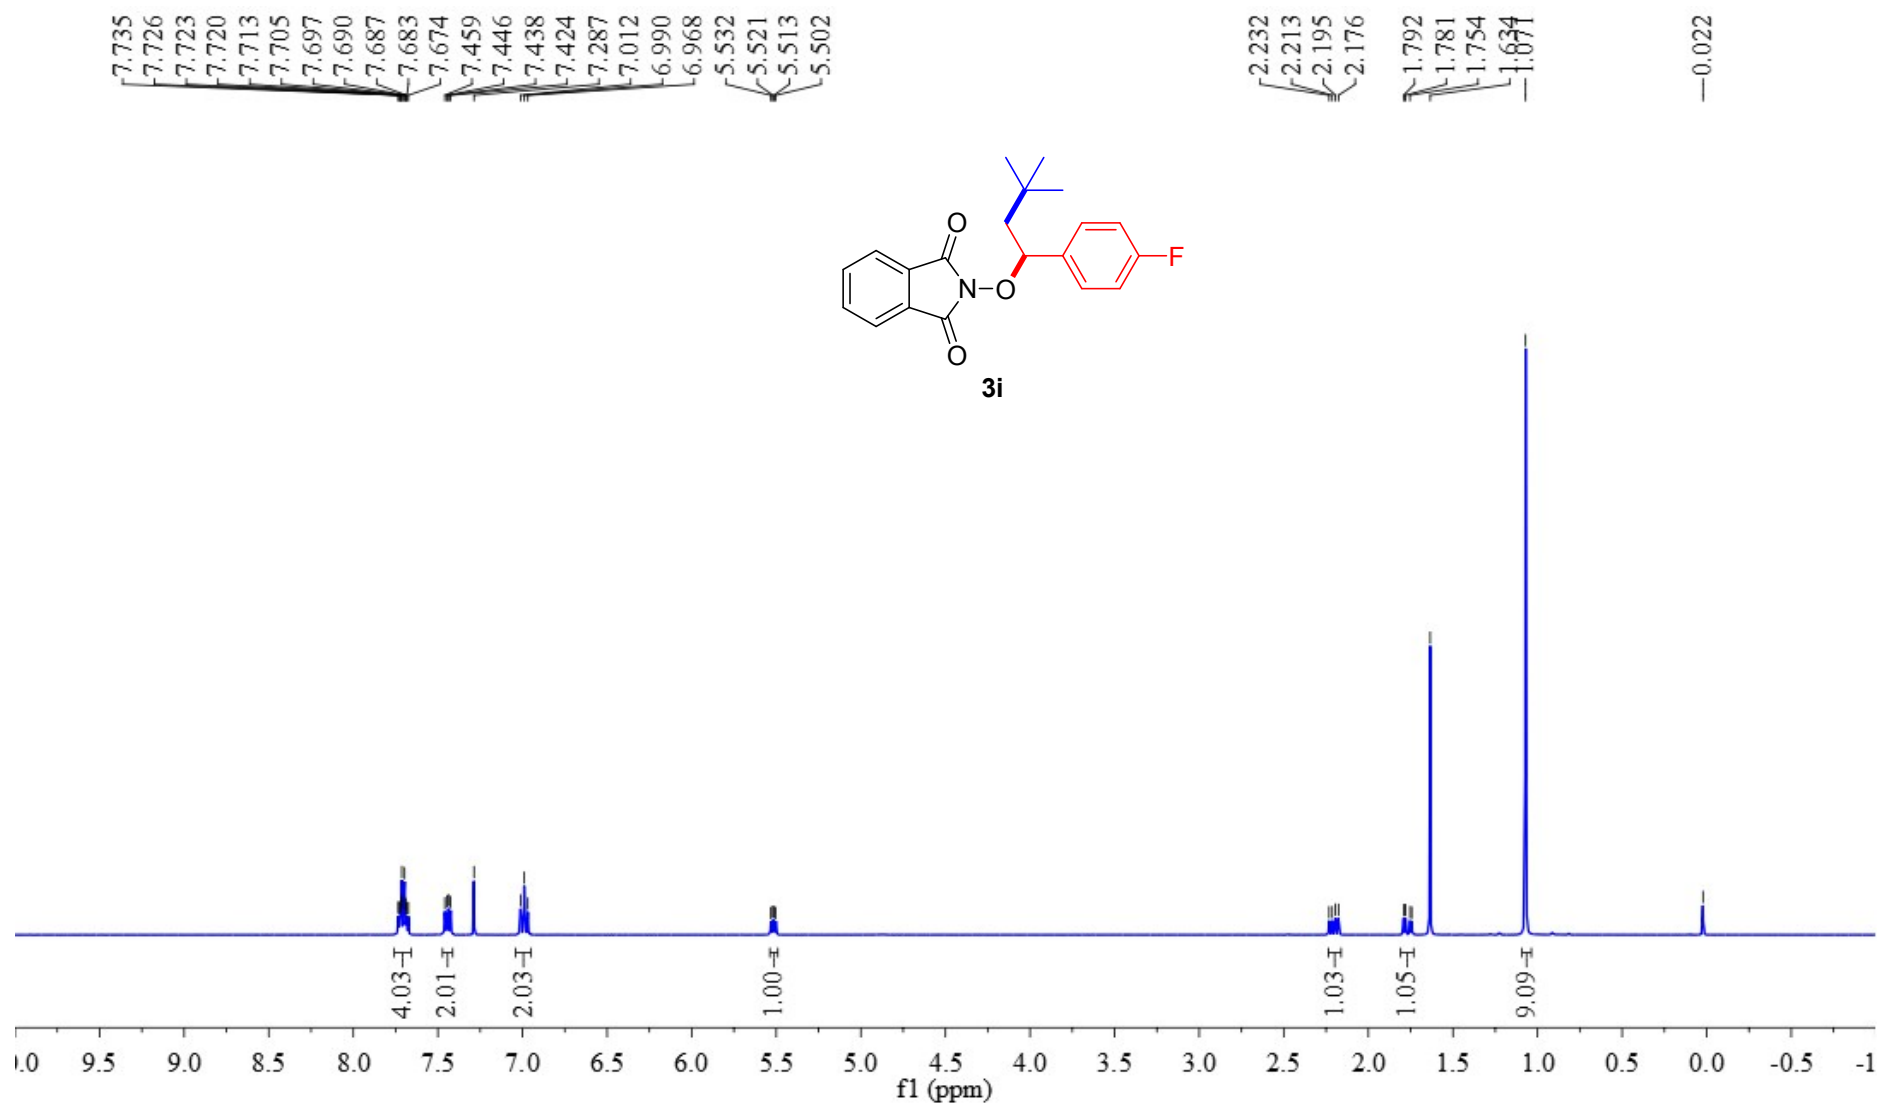

s26

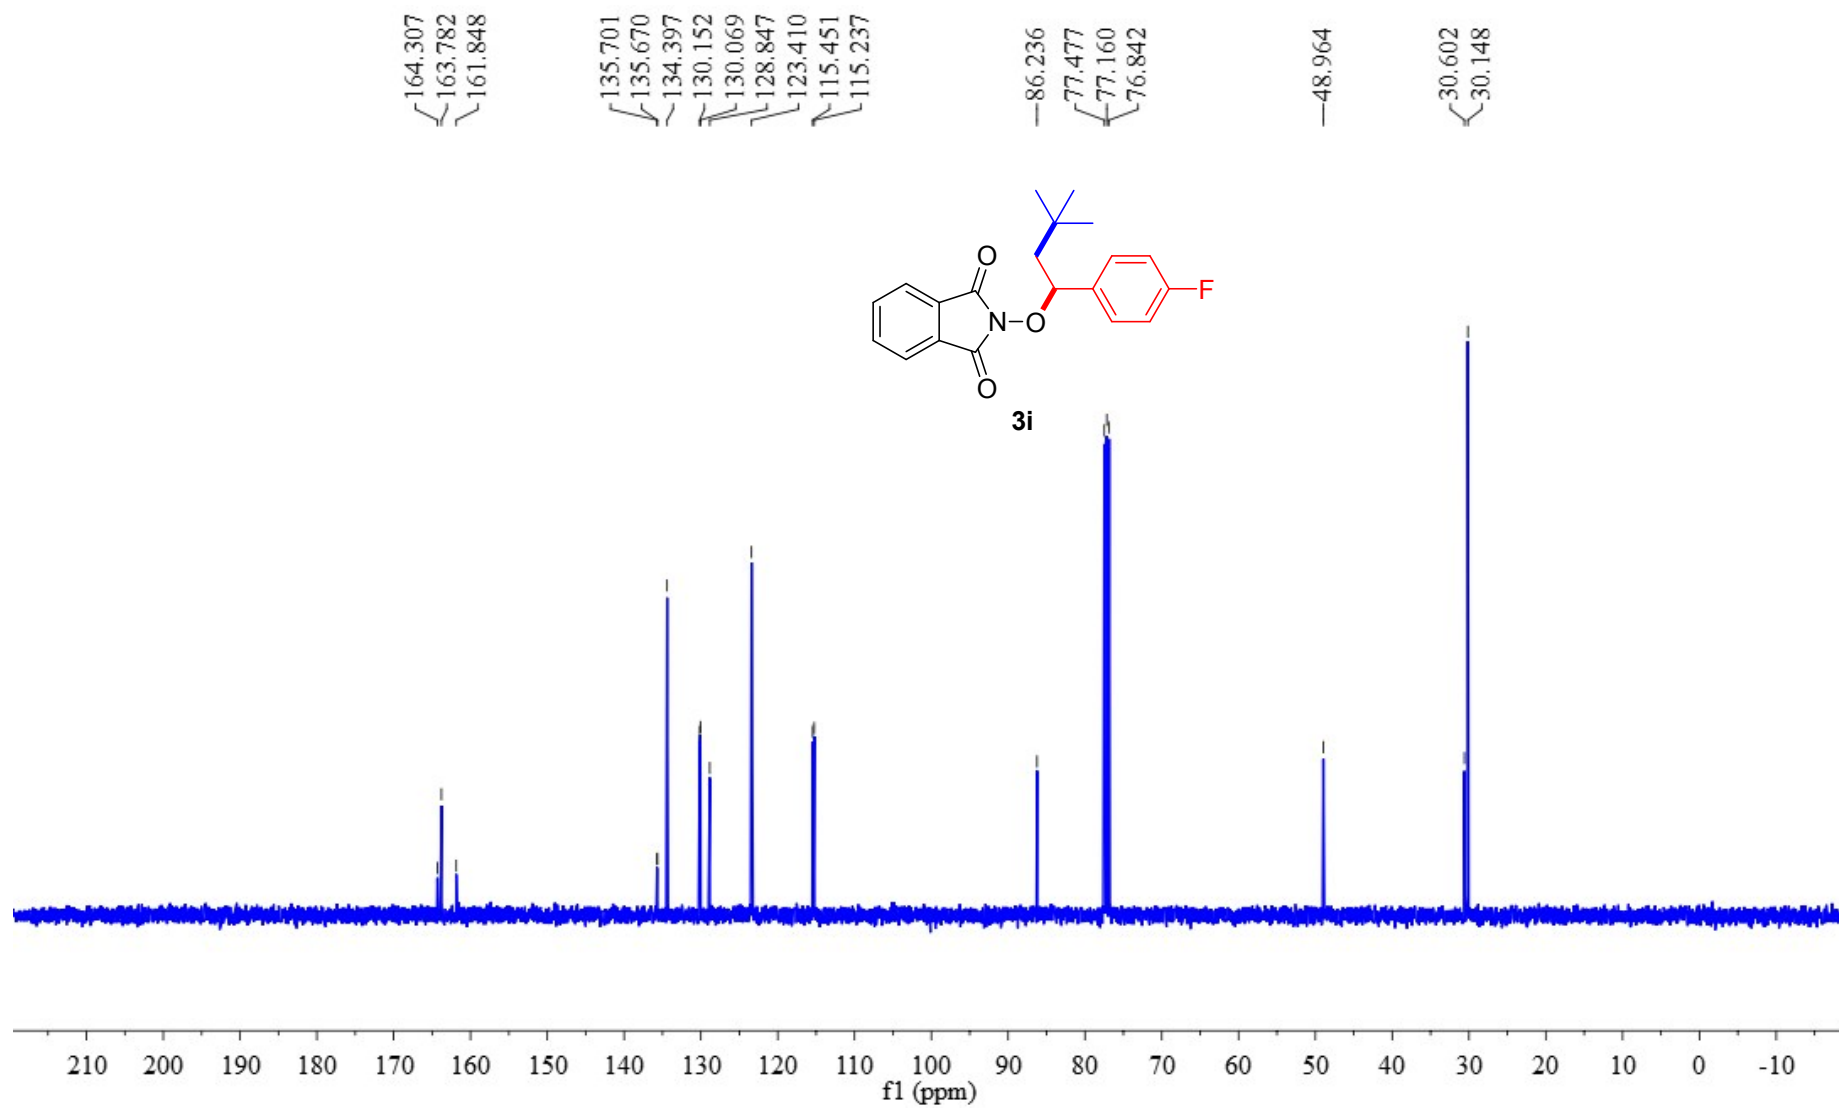

s27

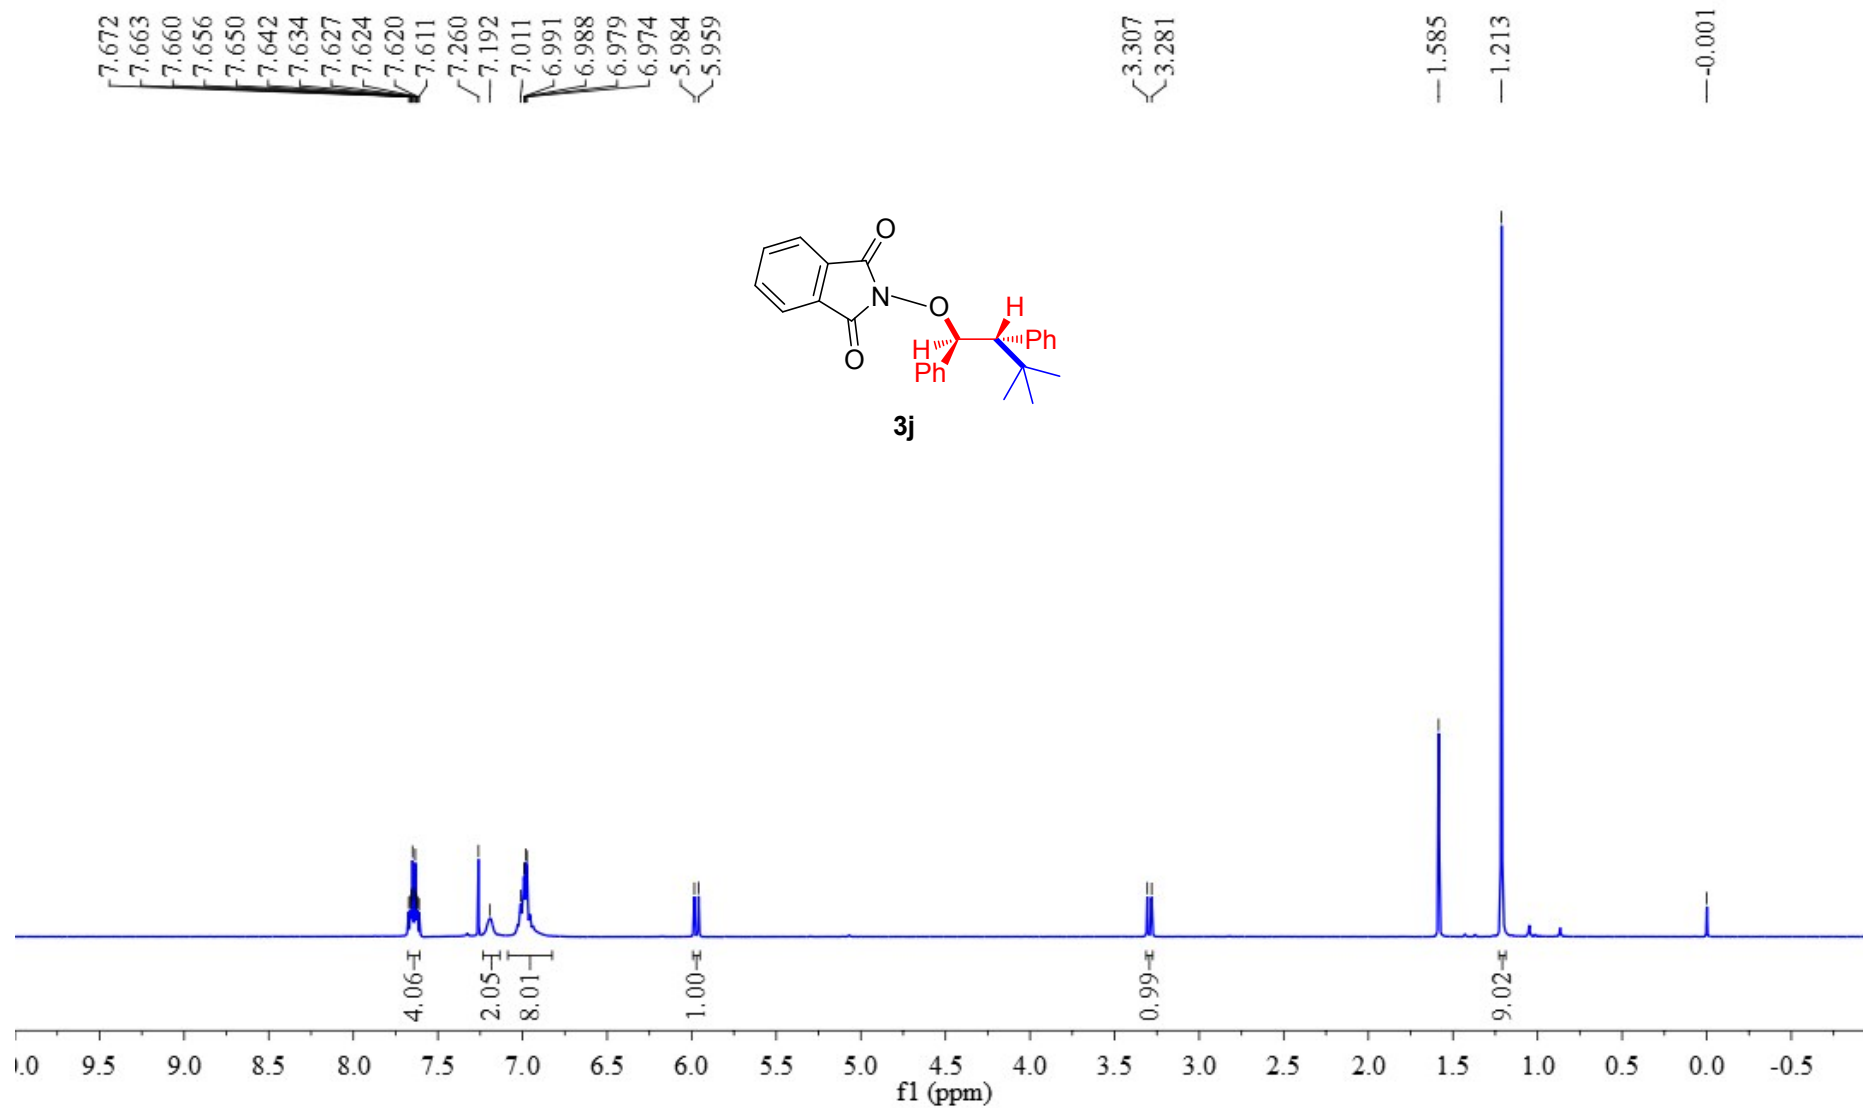

S28

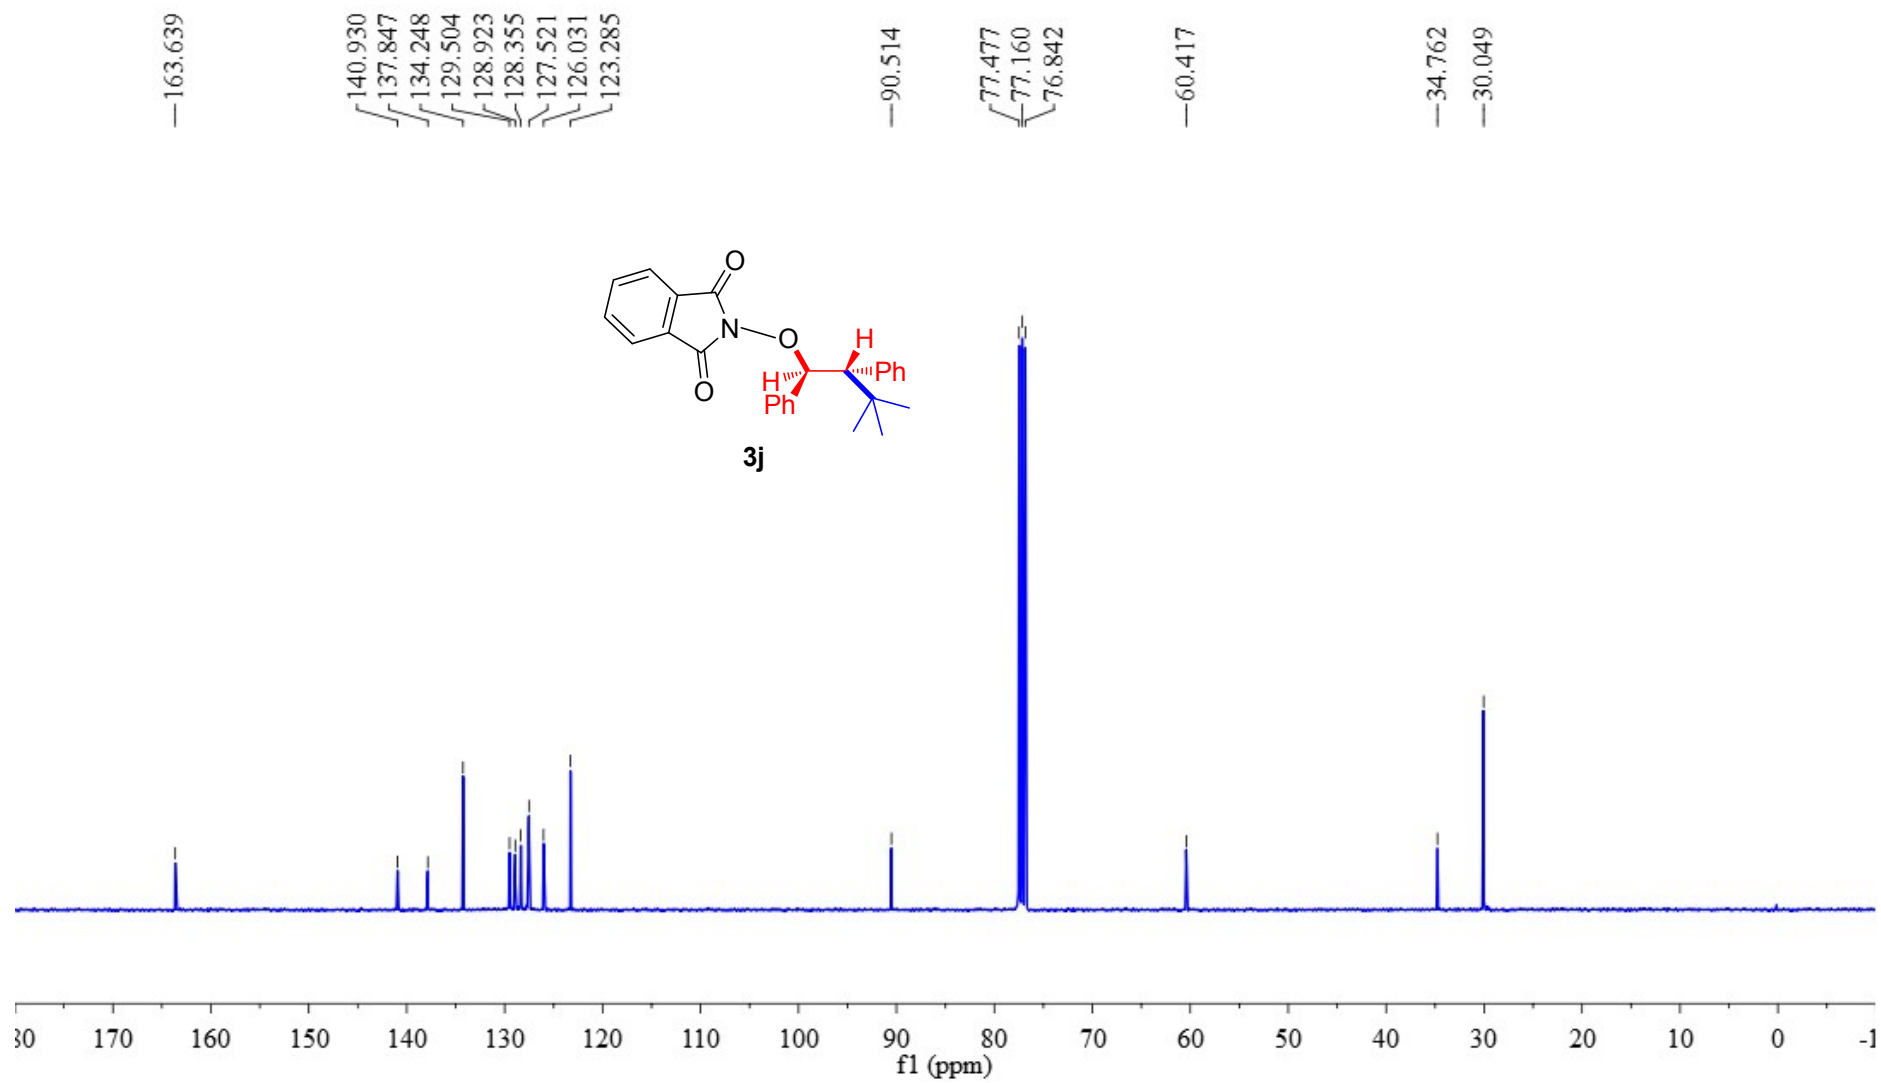

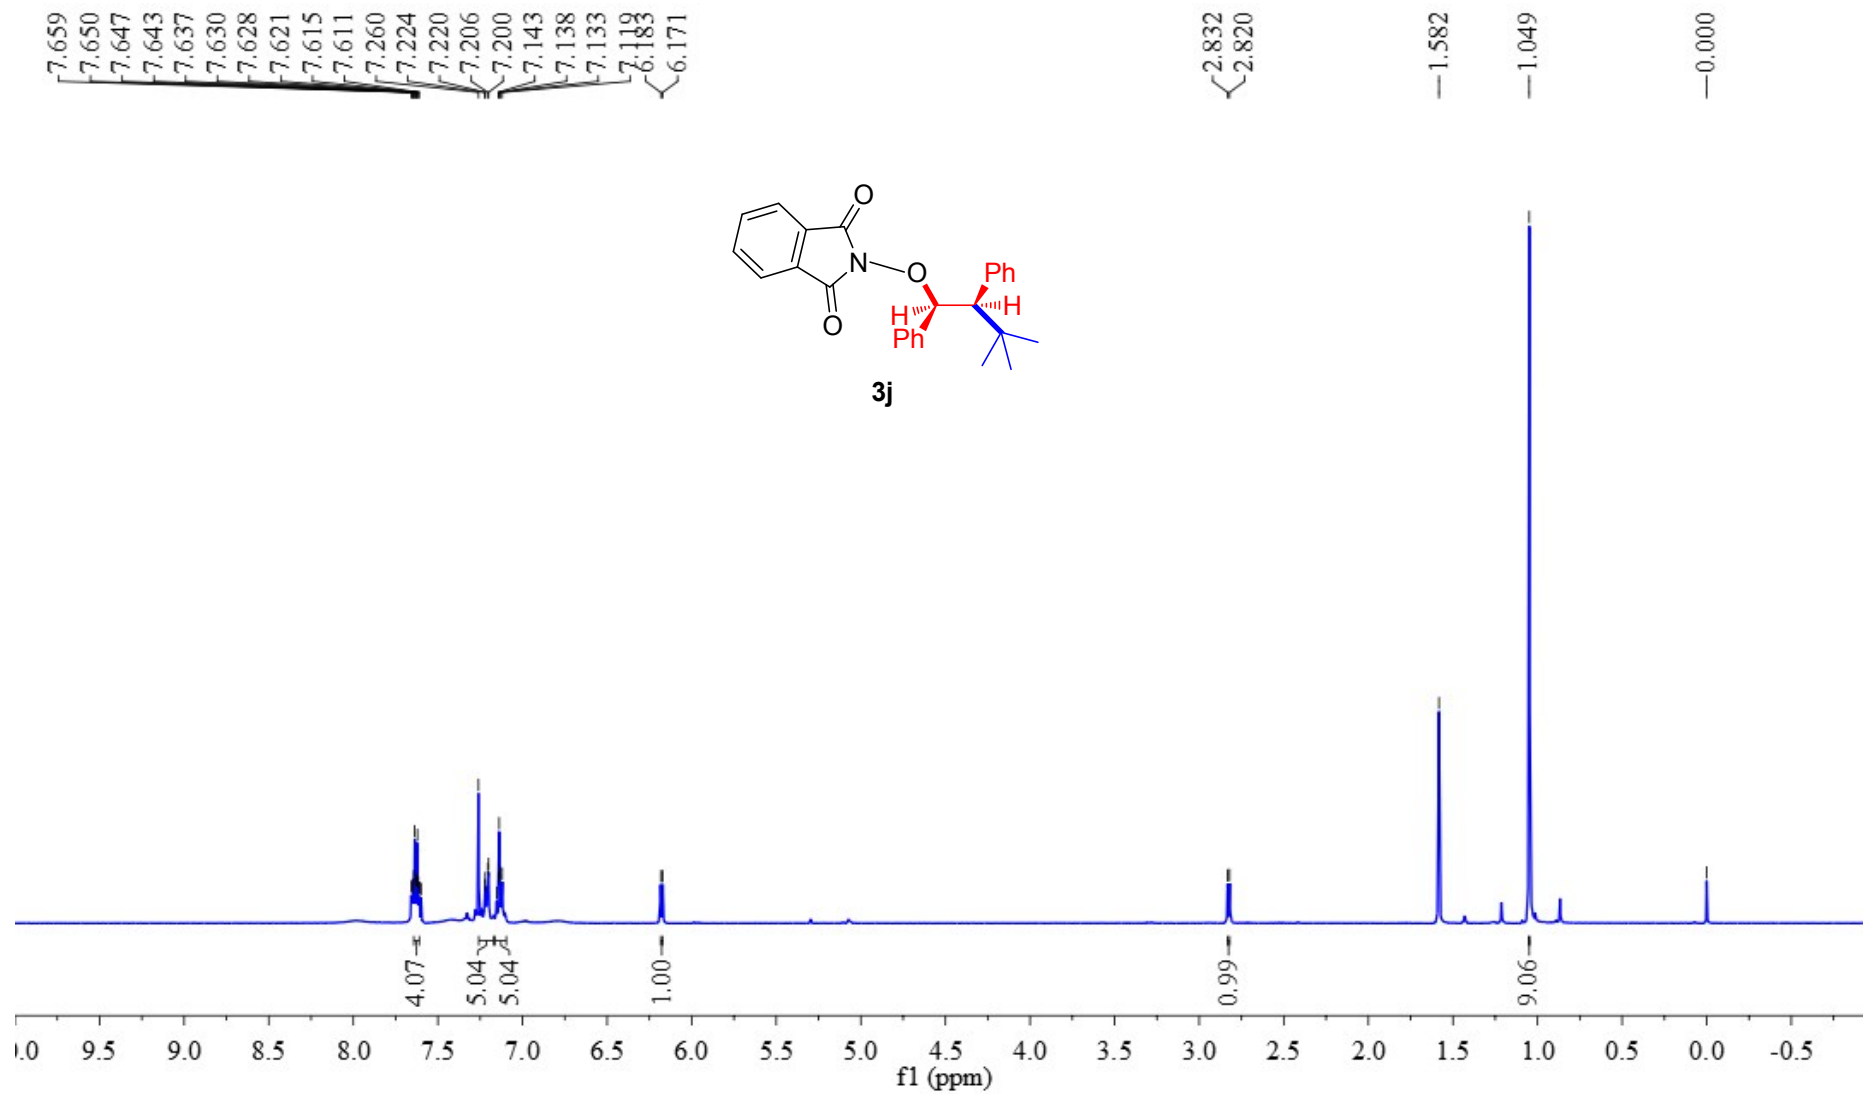

s30

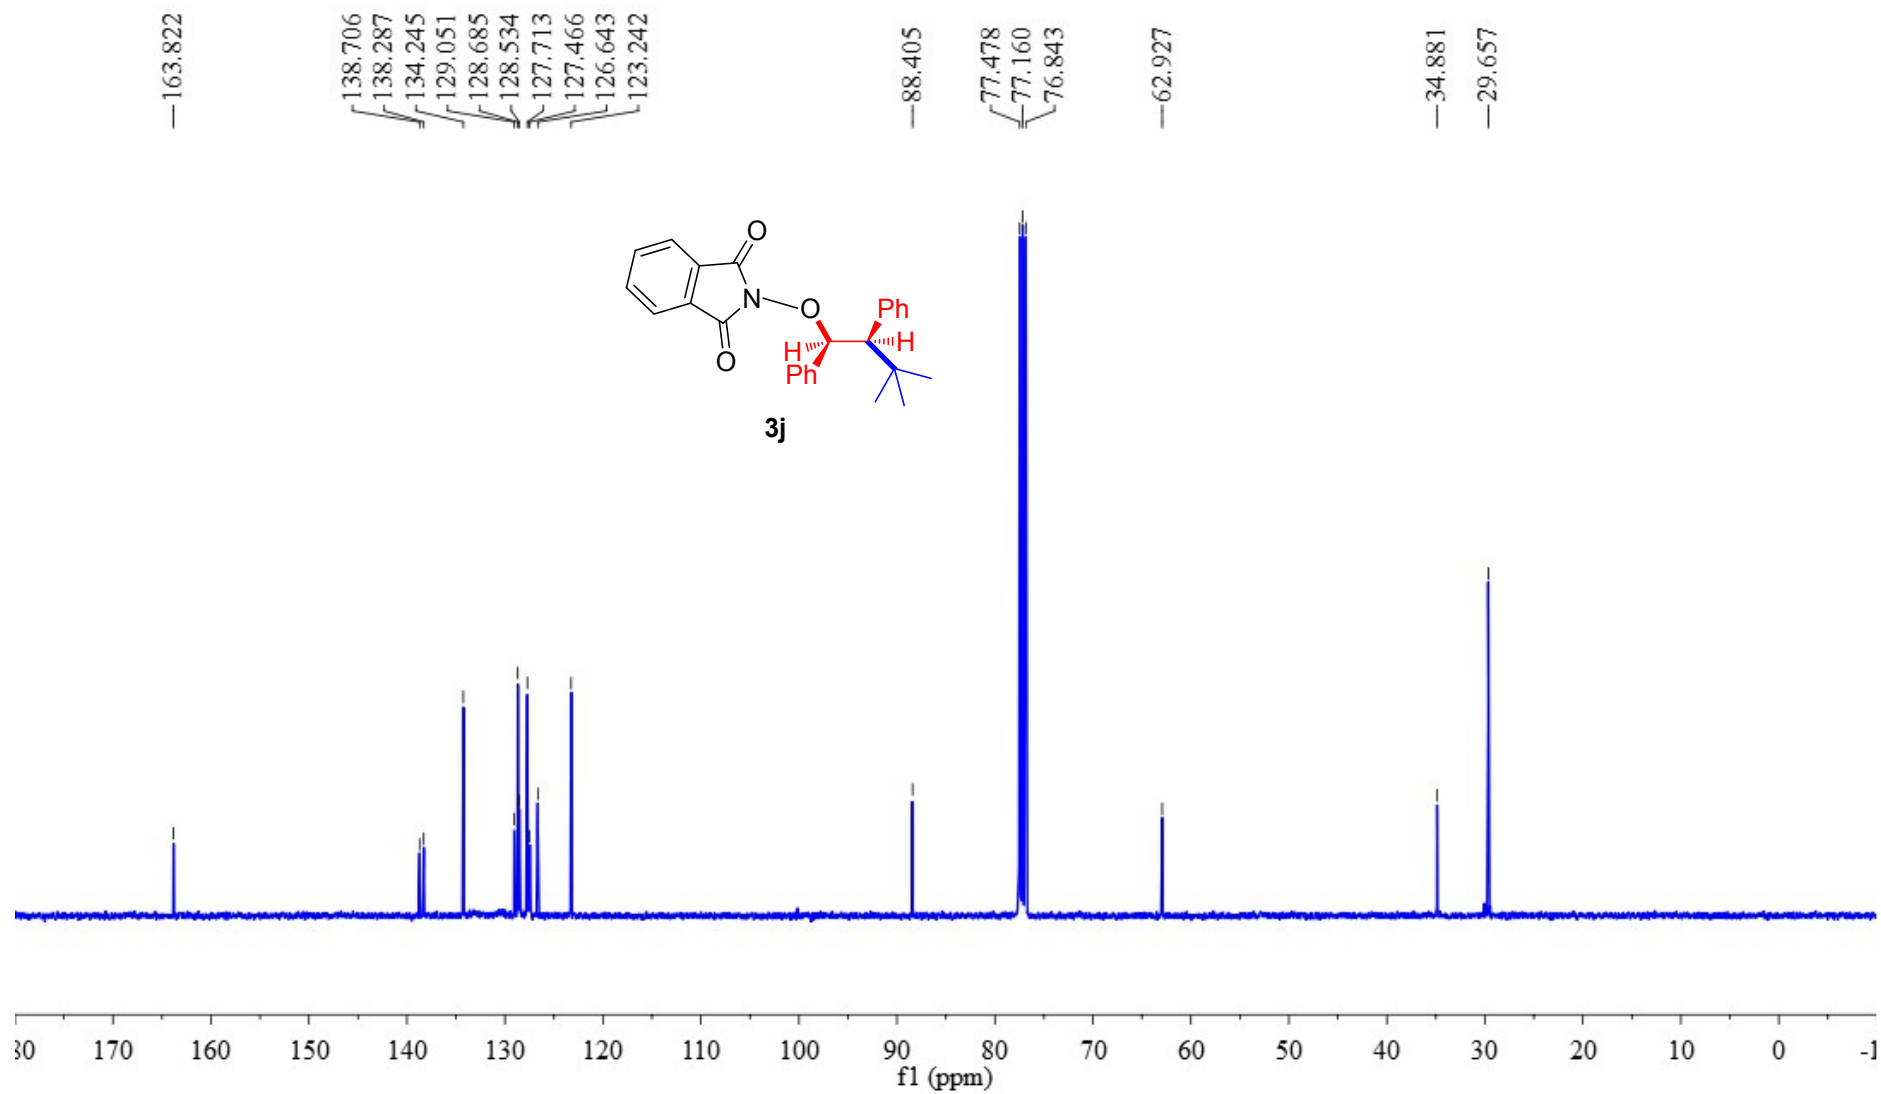

S31



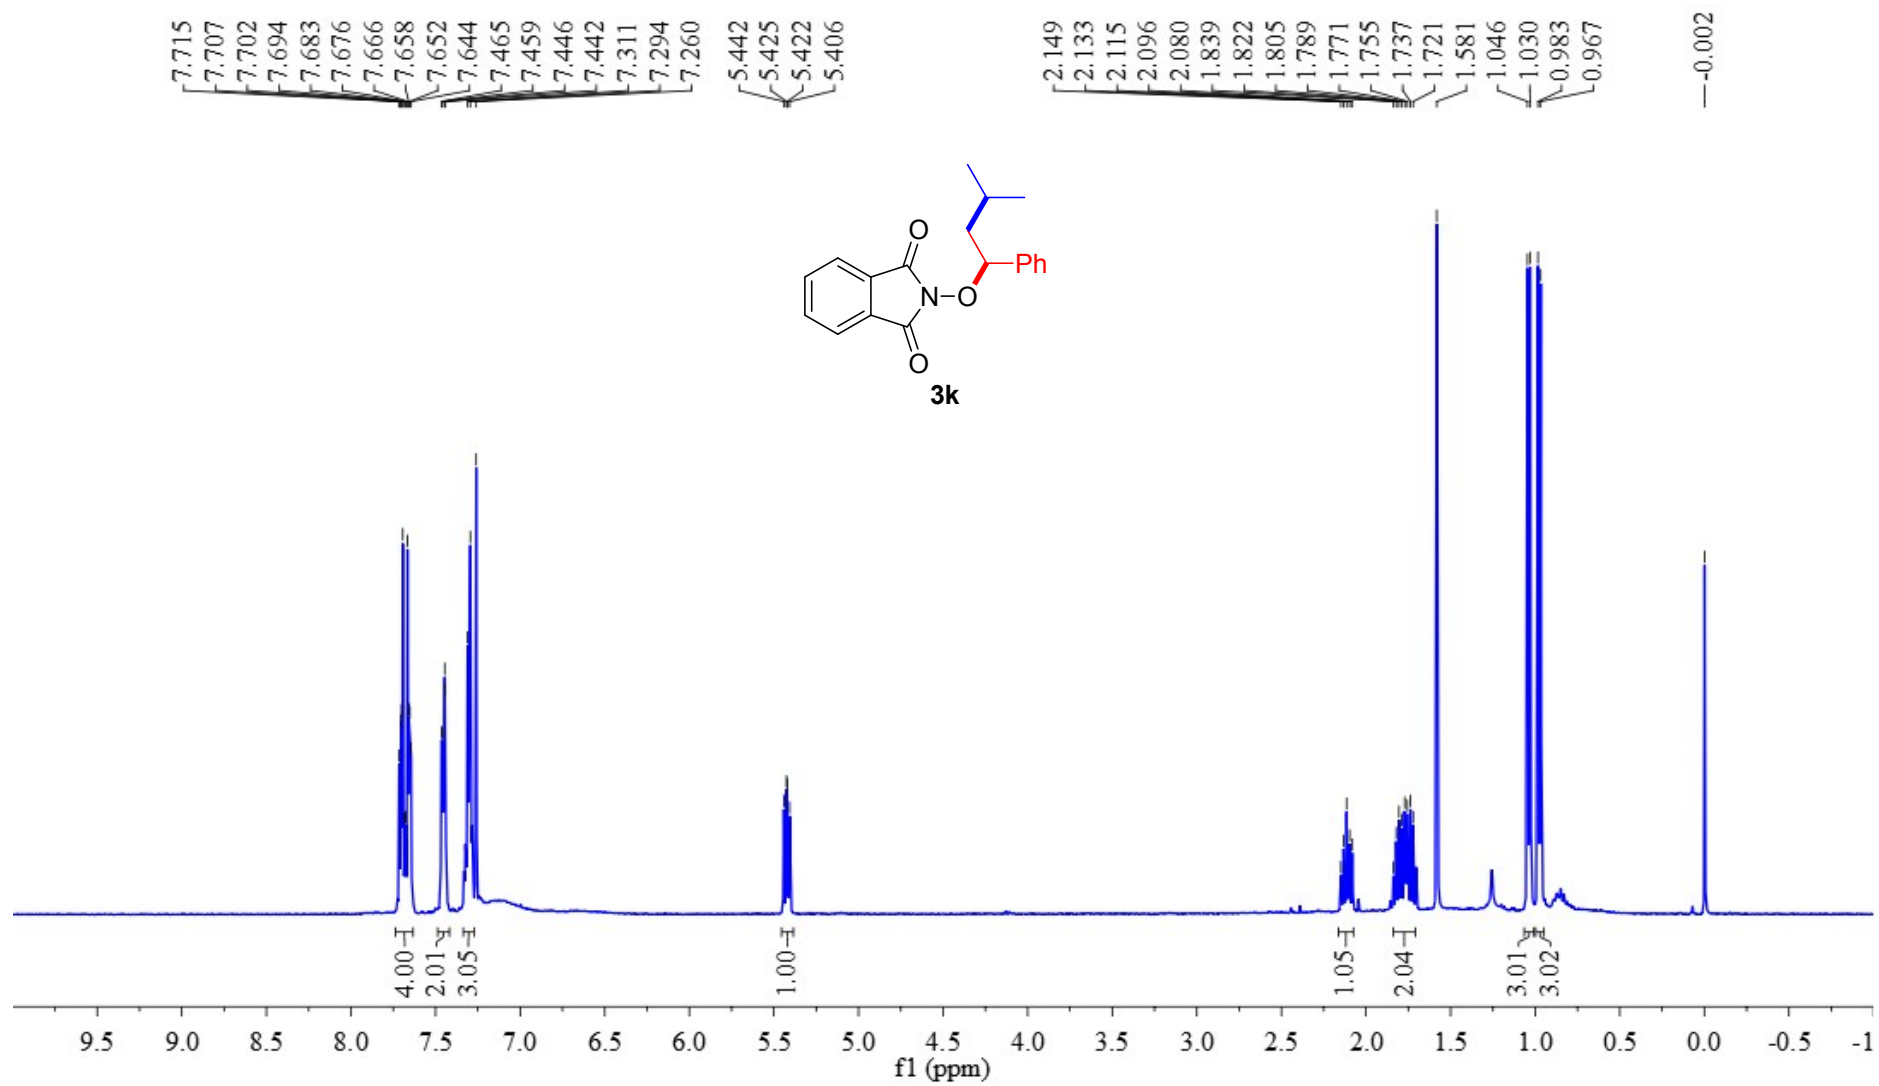

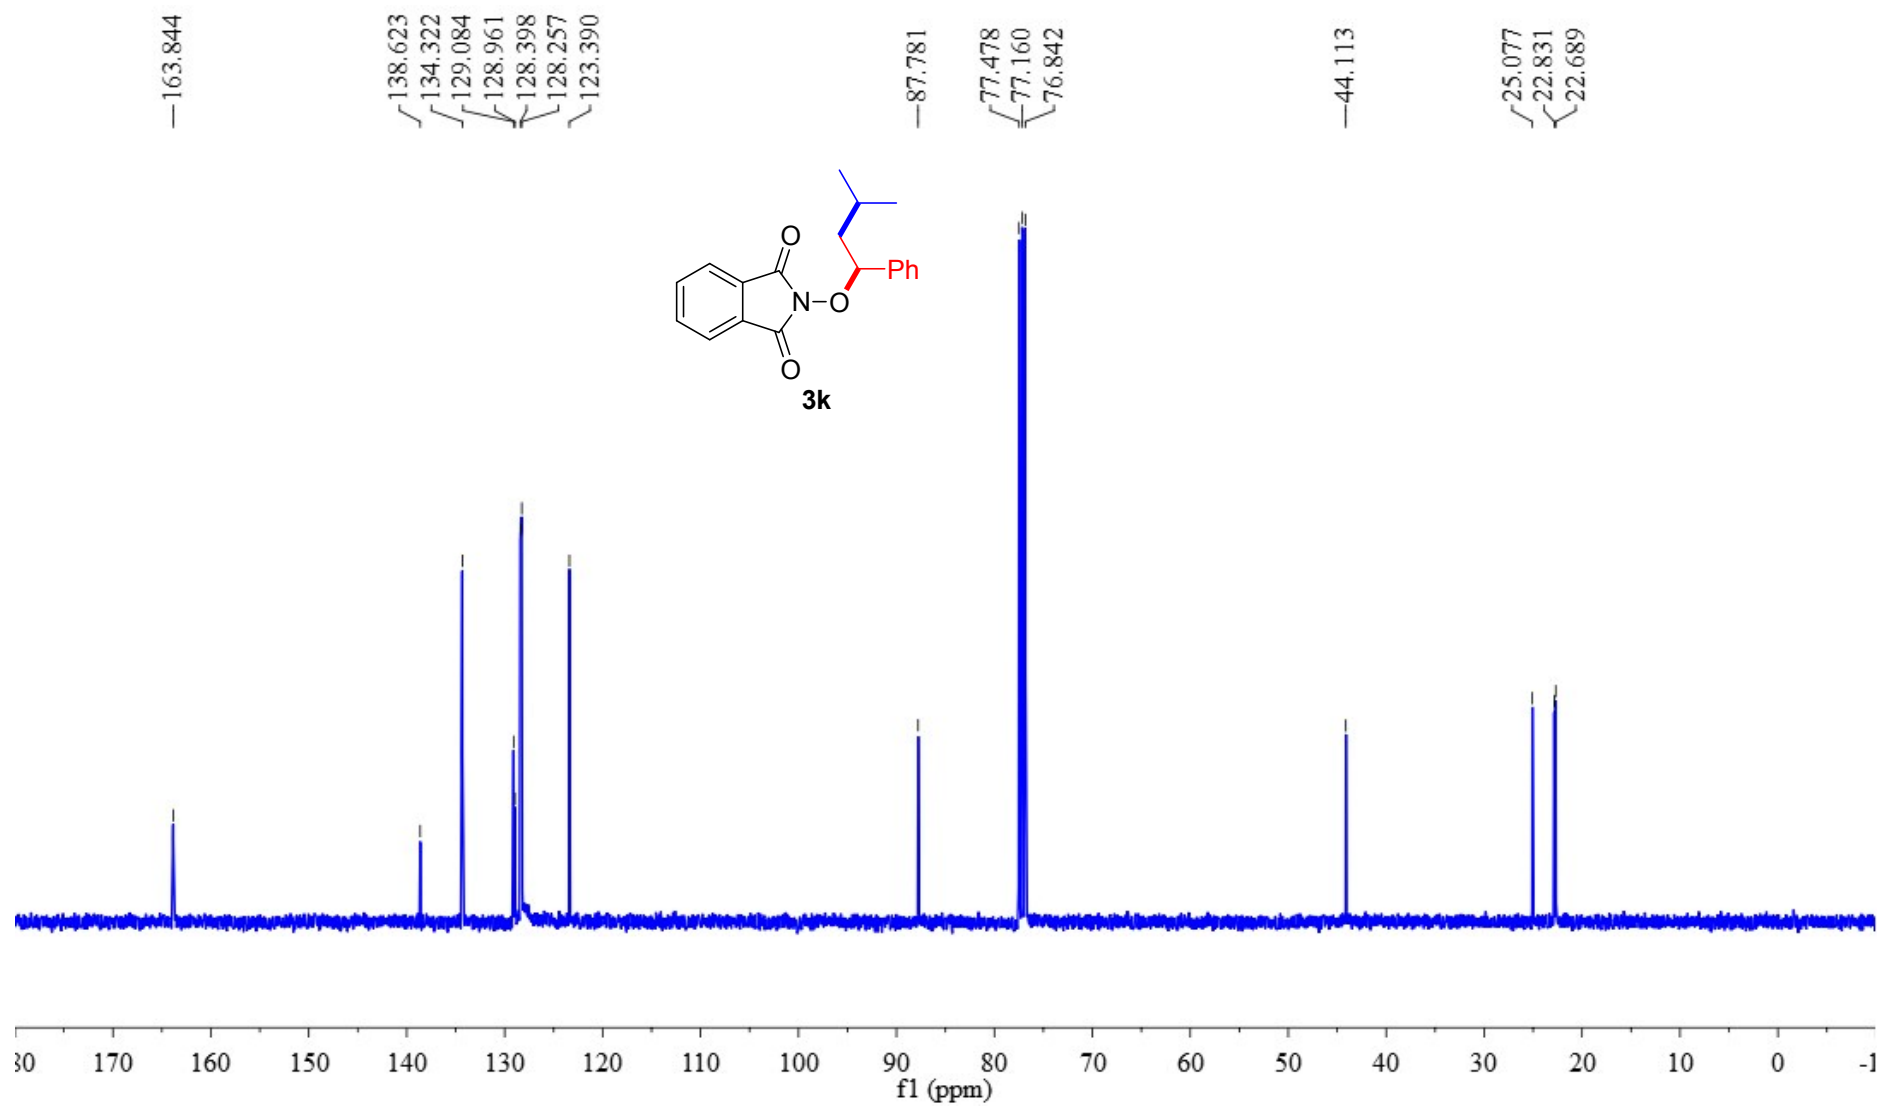

s33

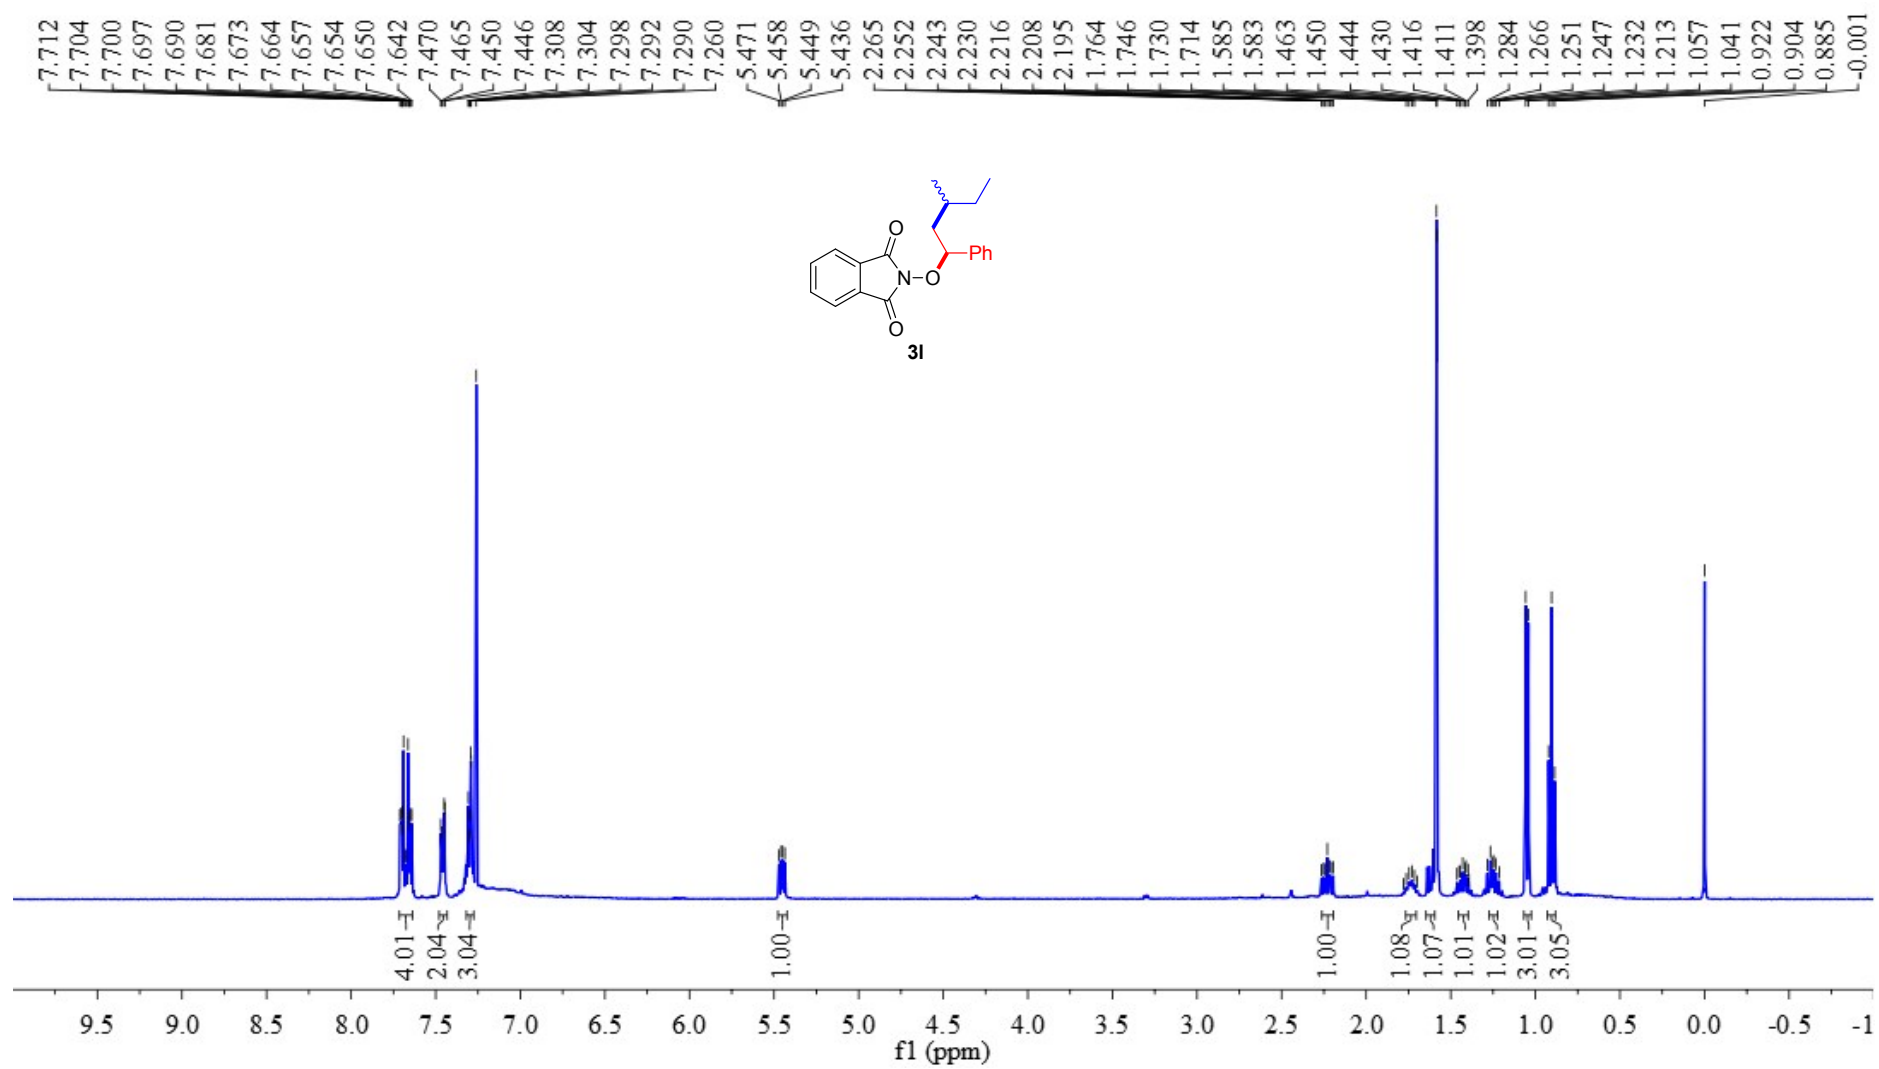

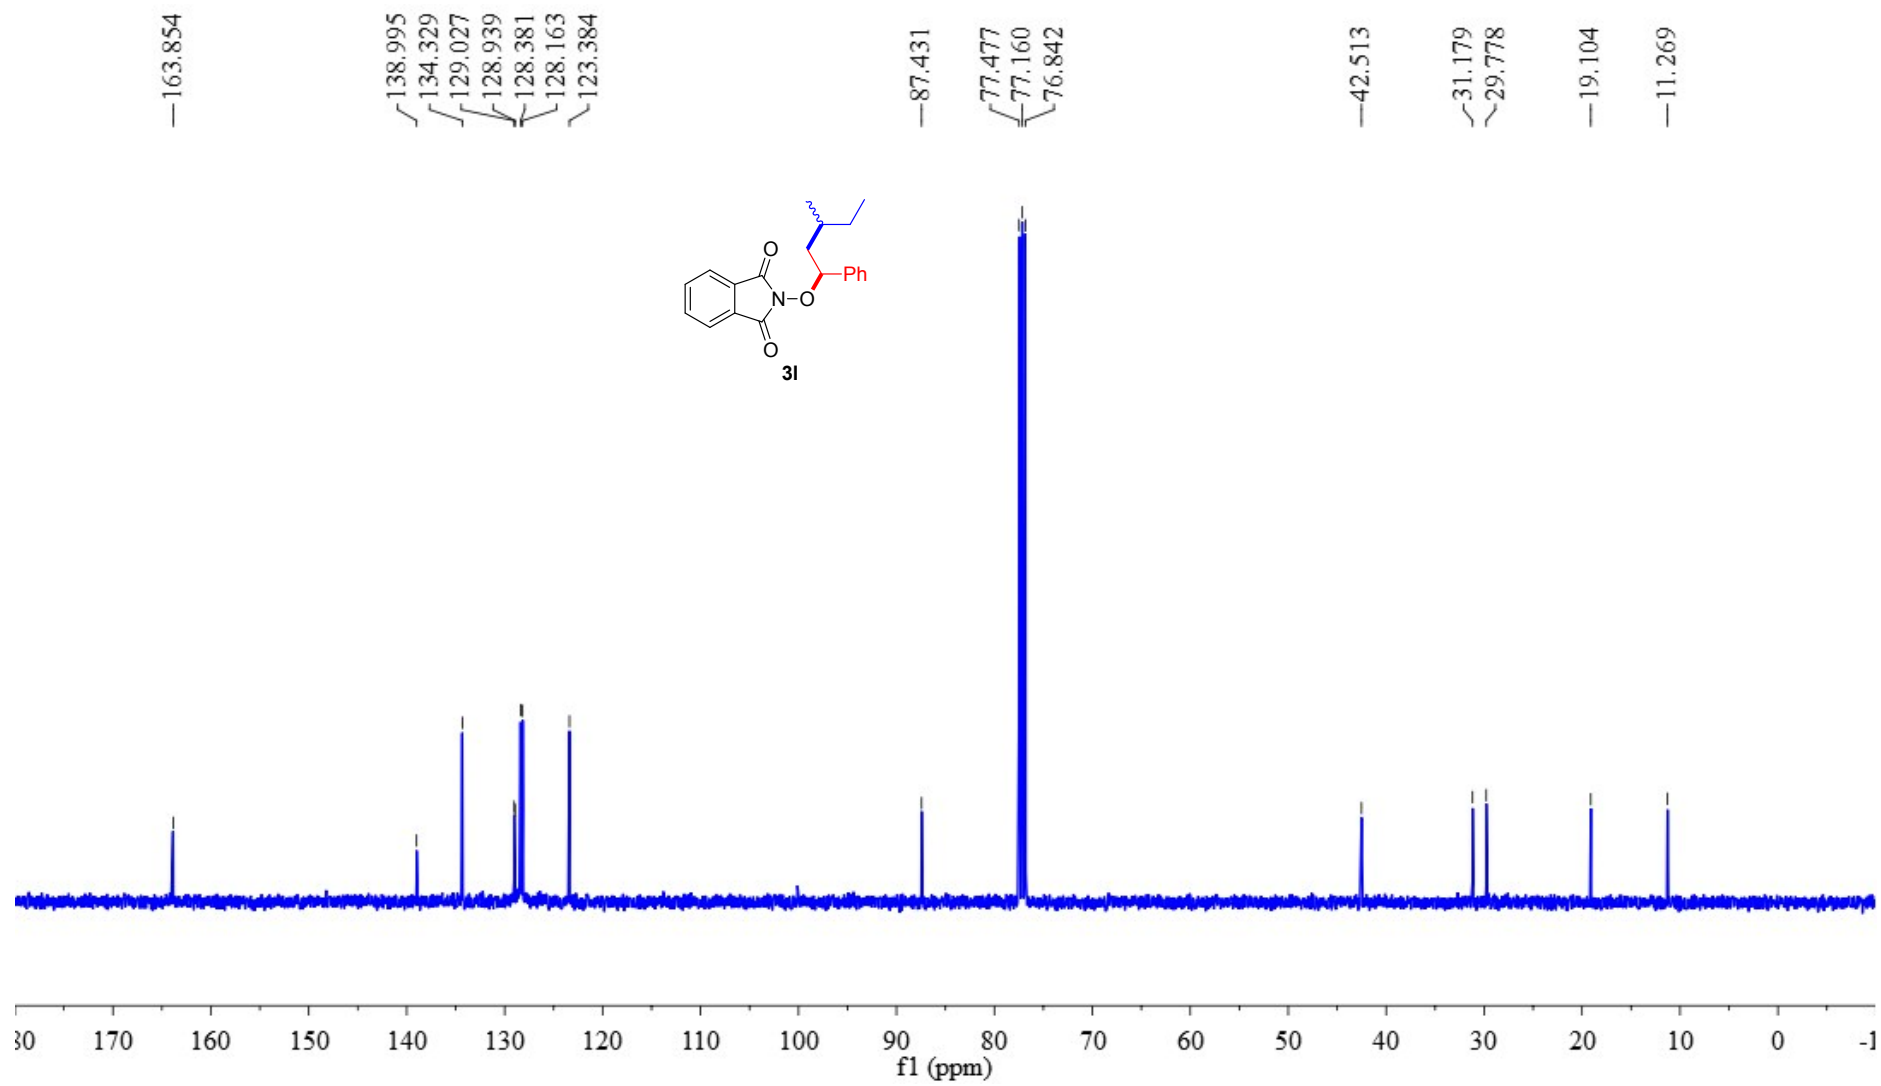

s35

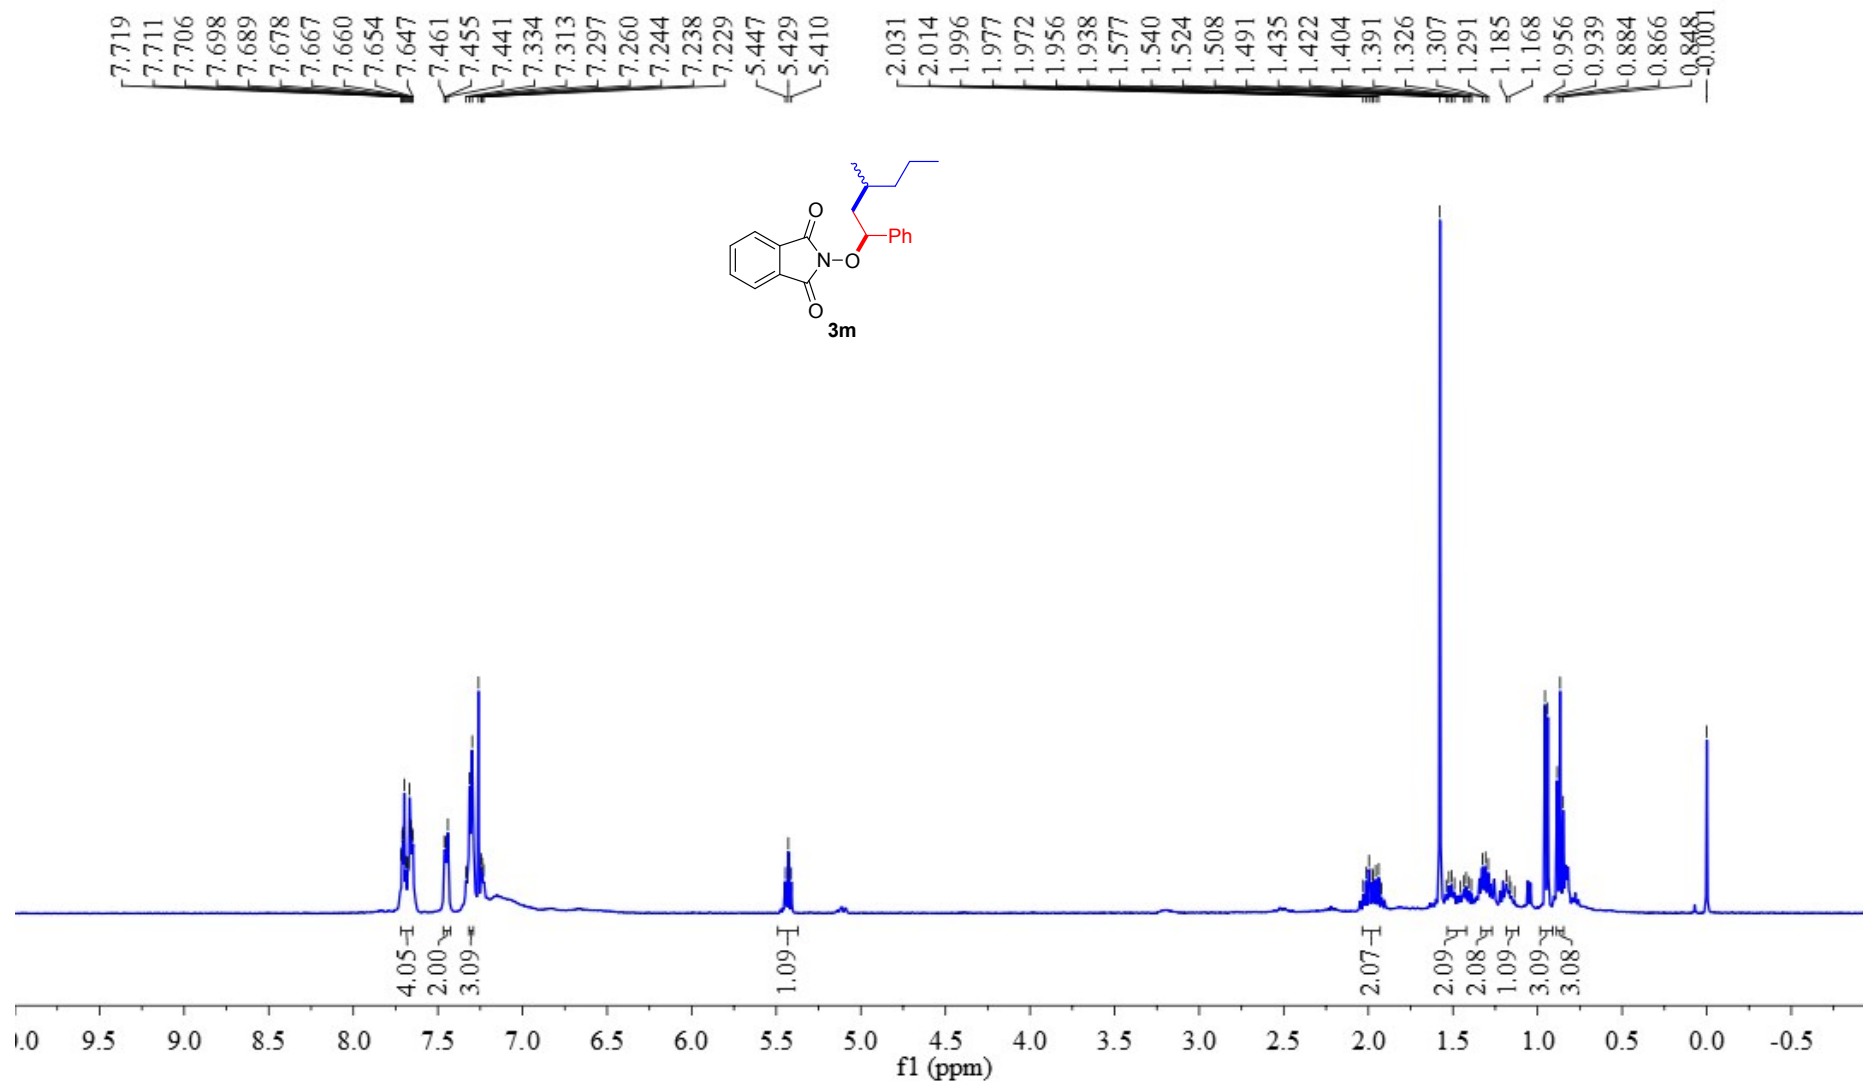

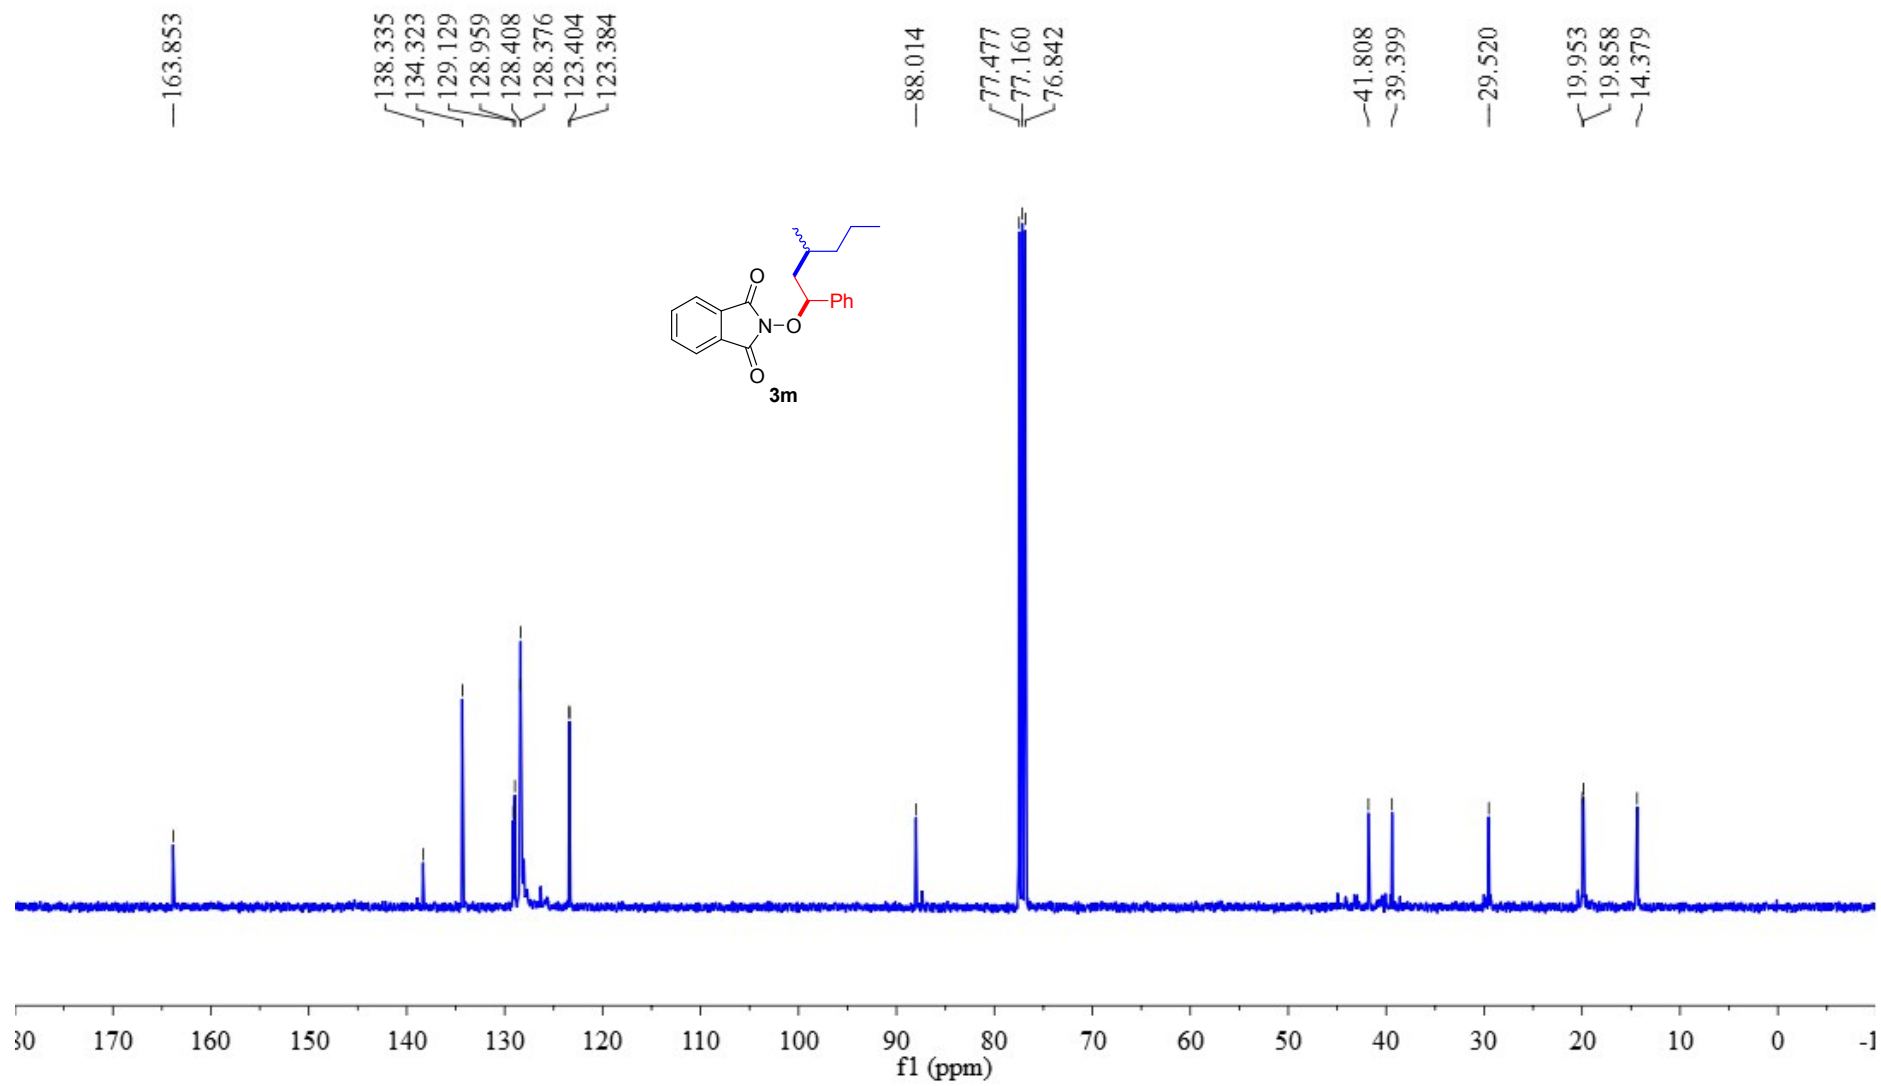

s37

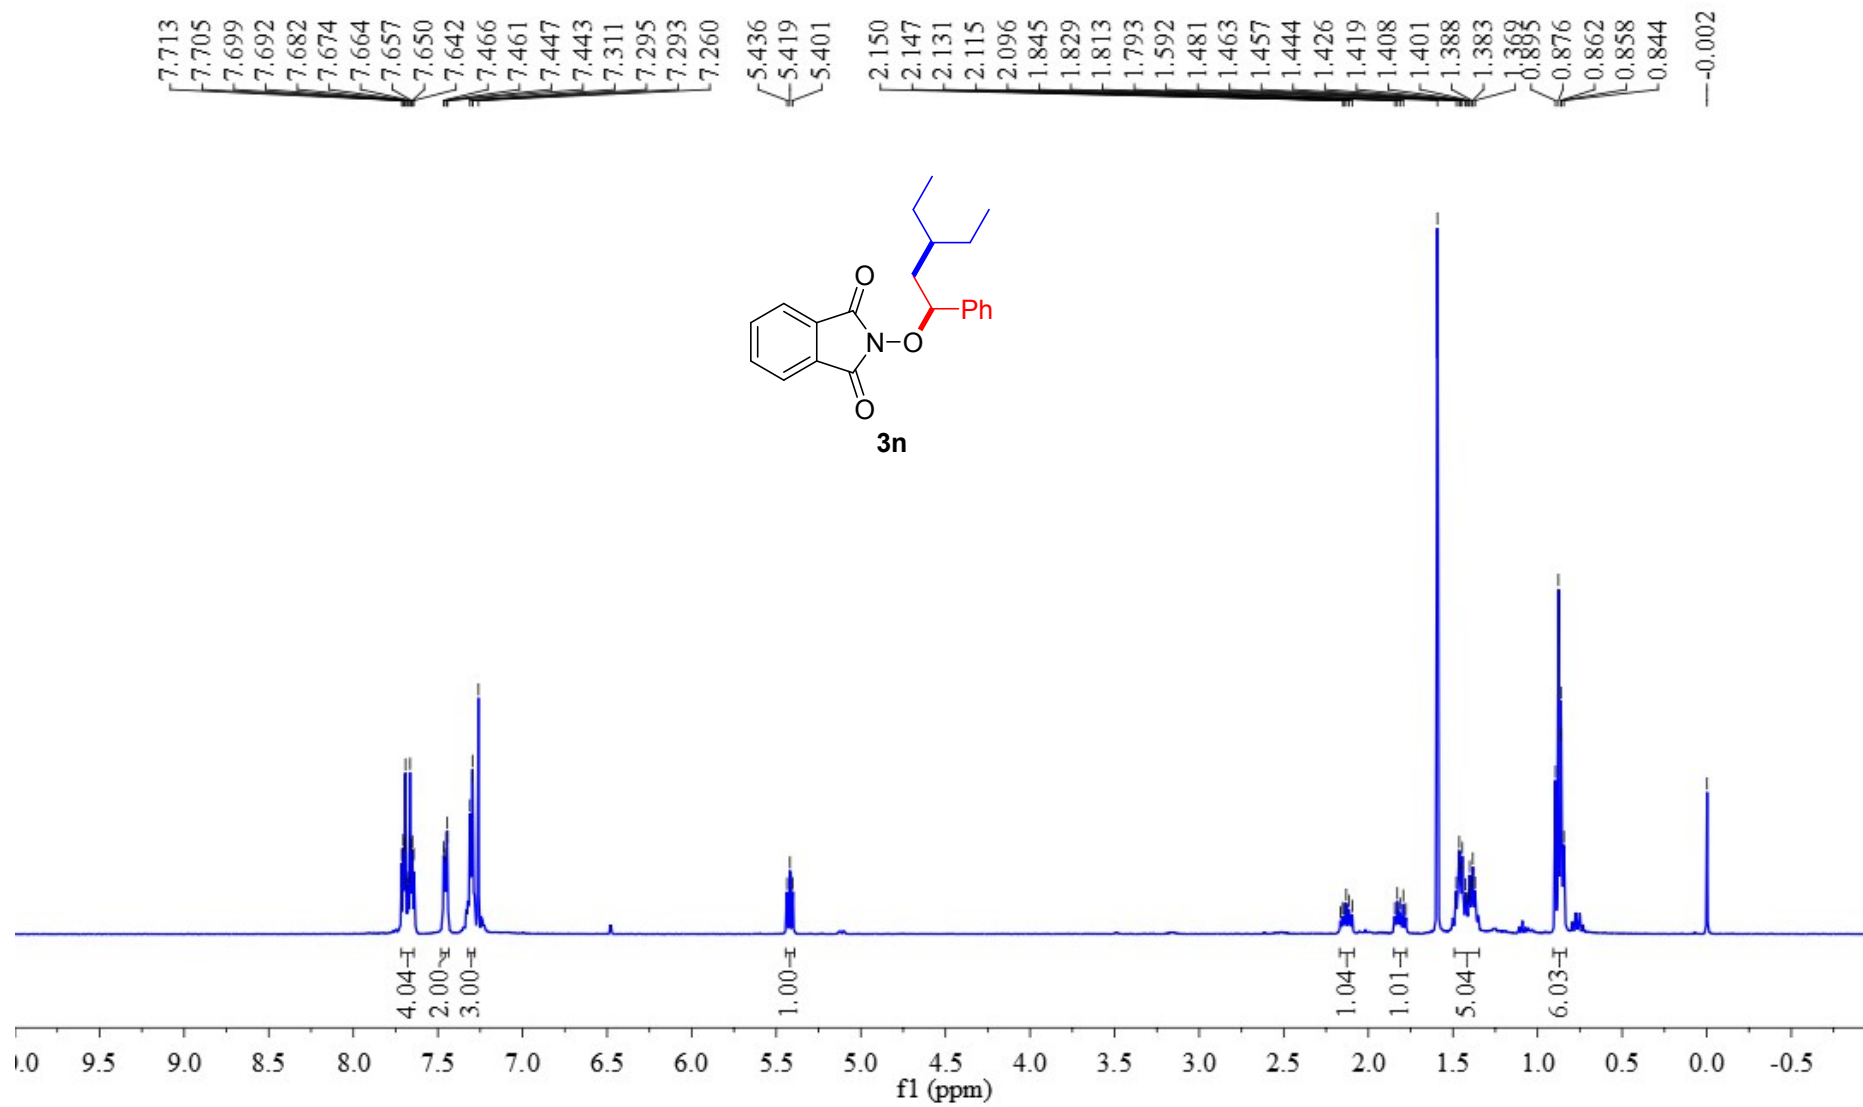

S38

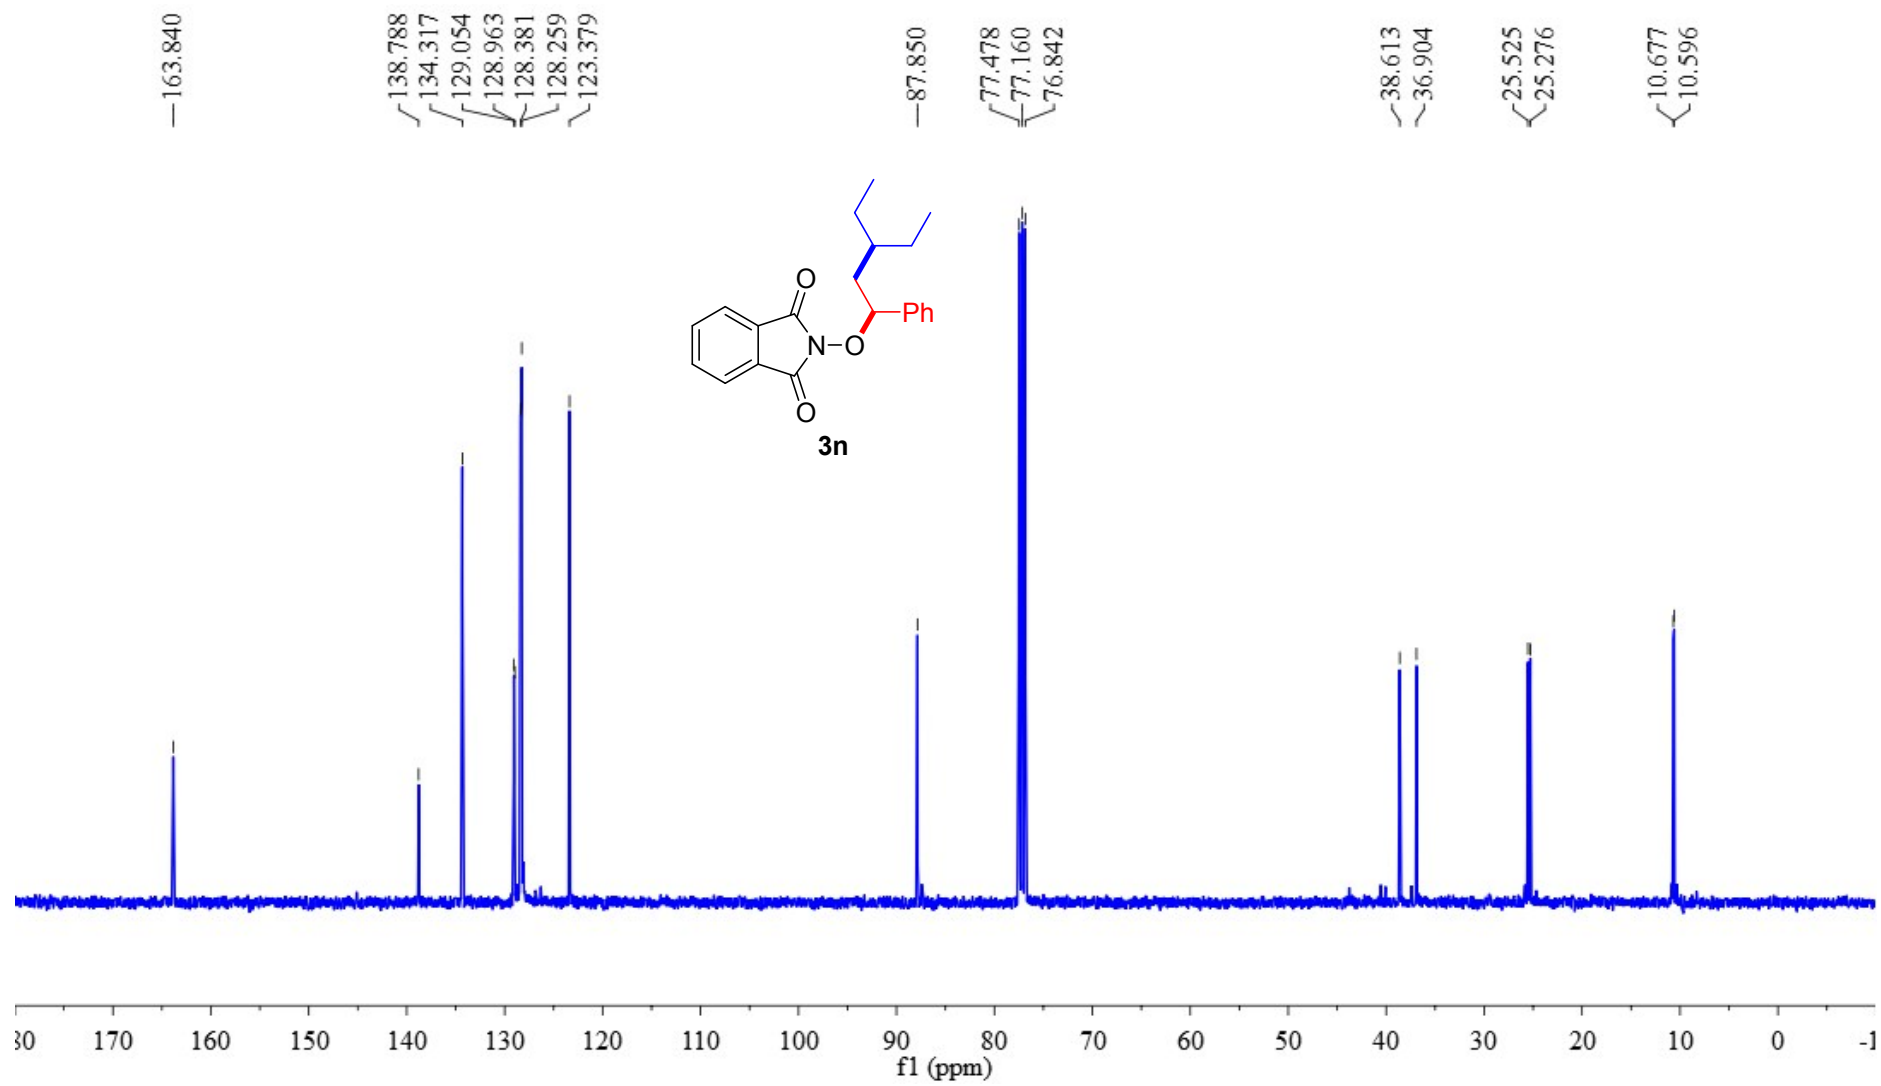



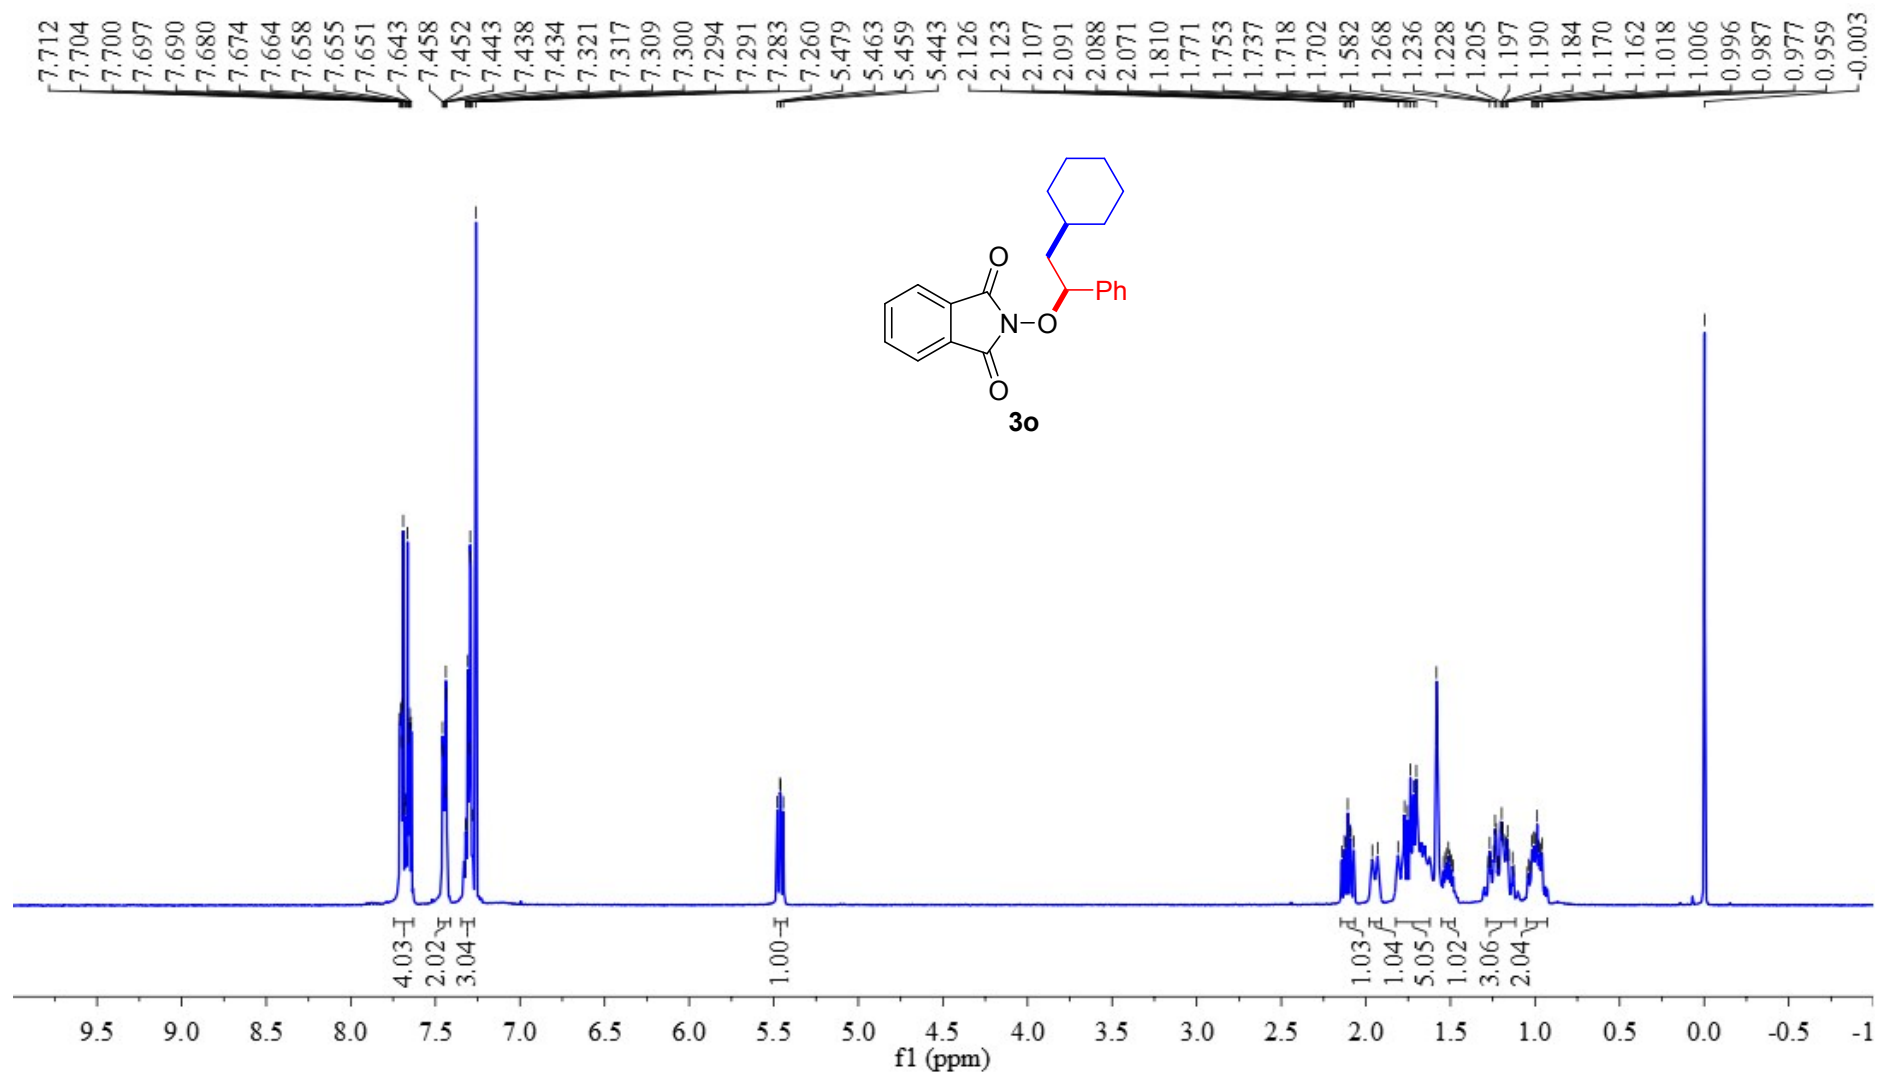

s40

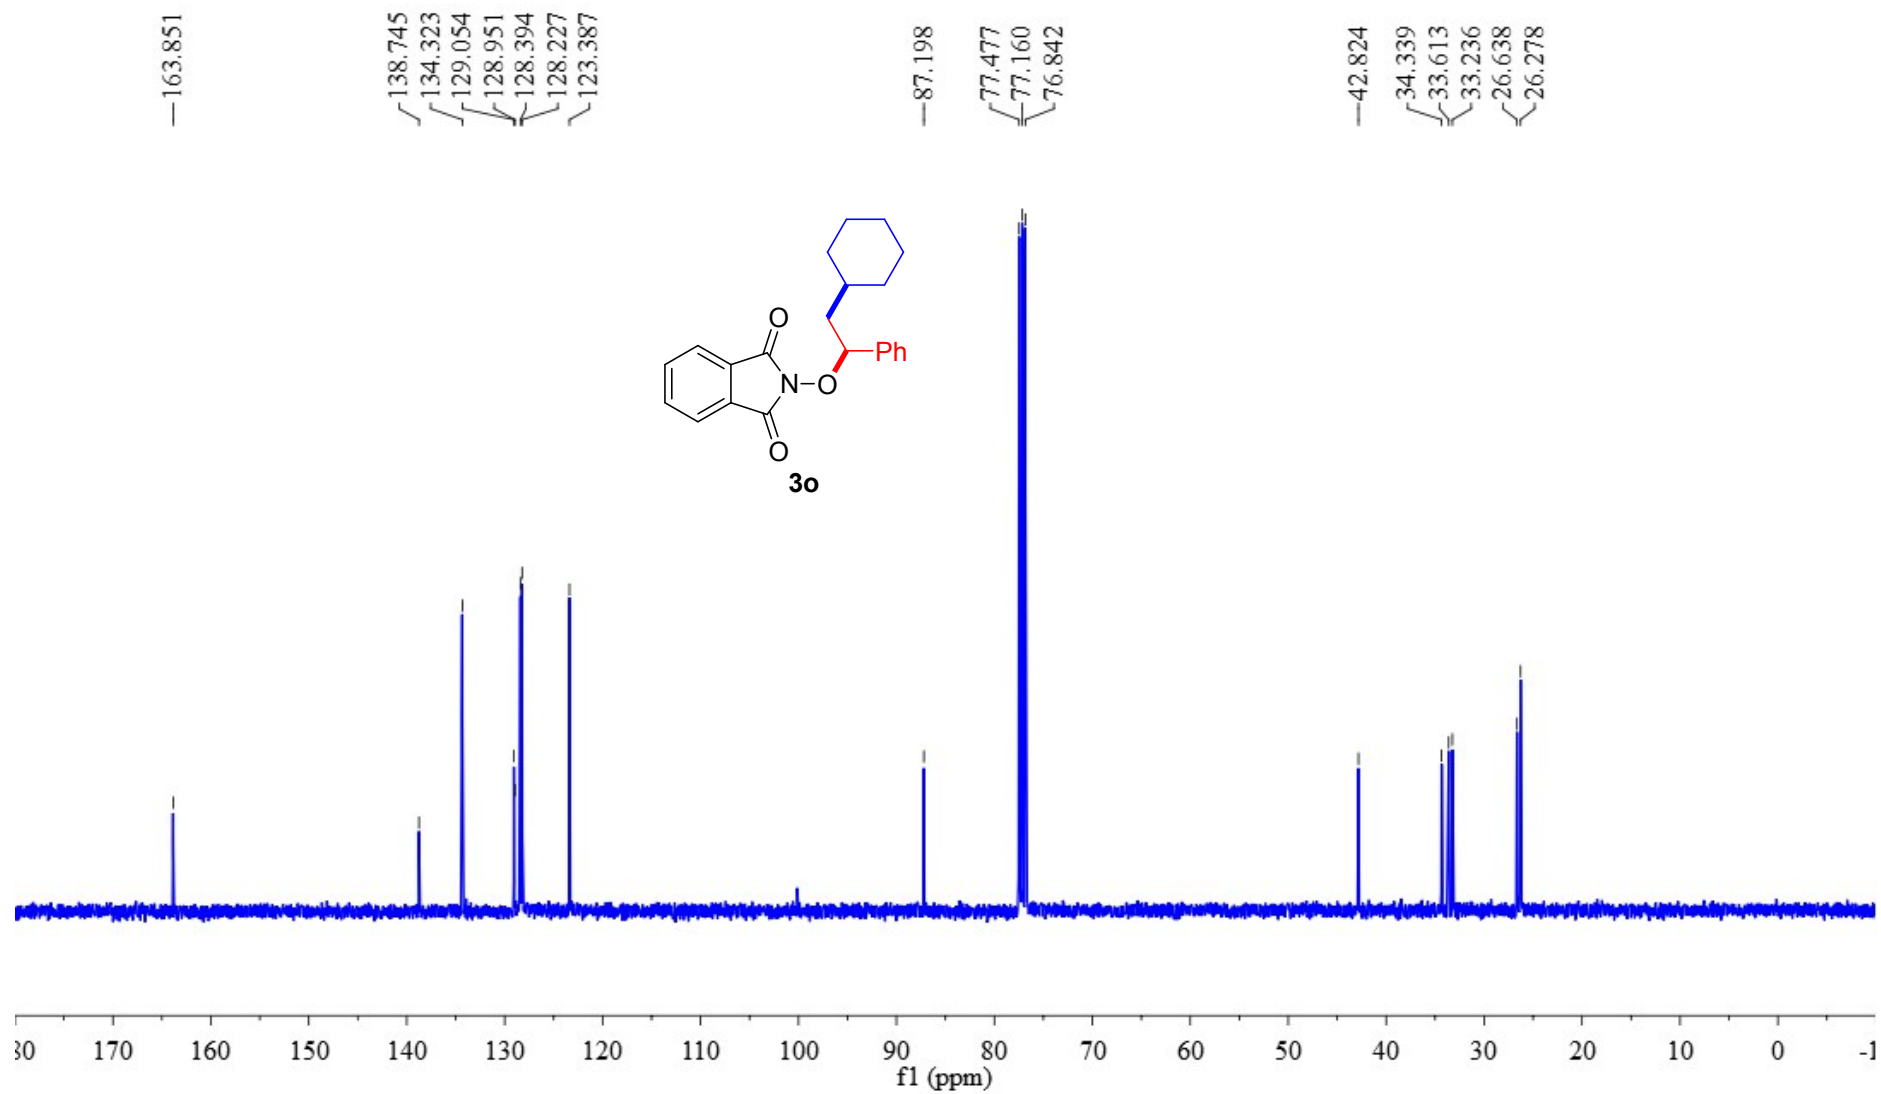

S41

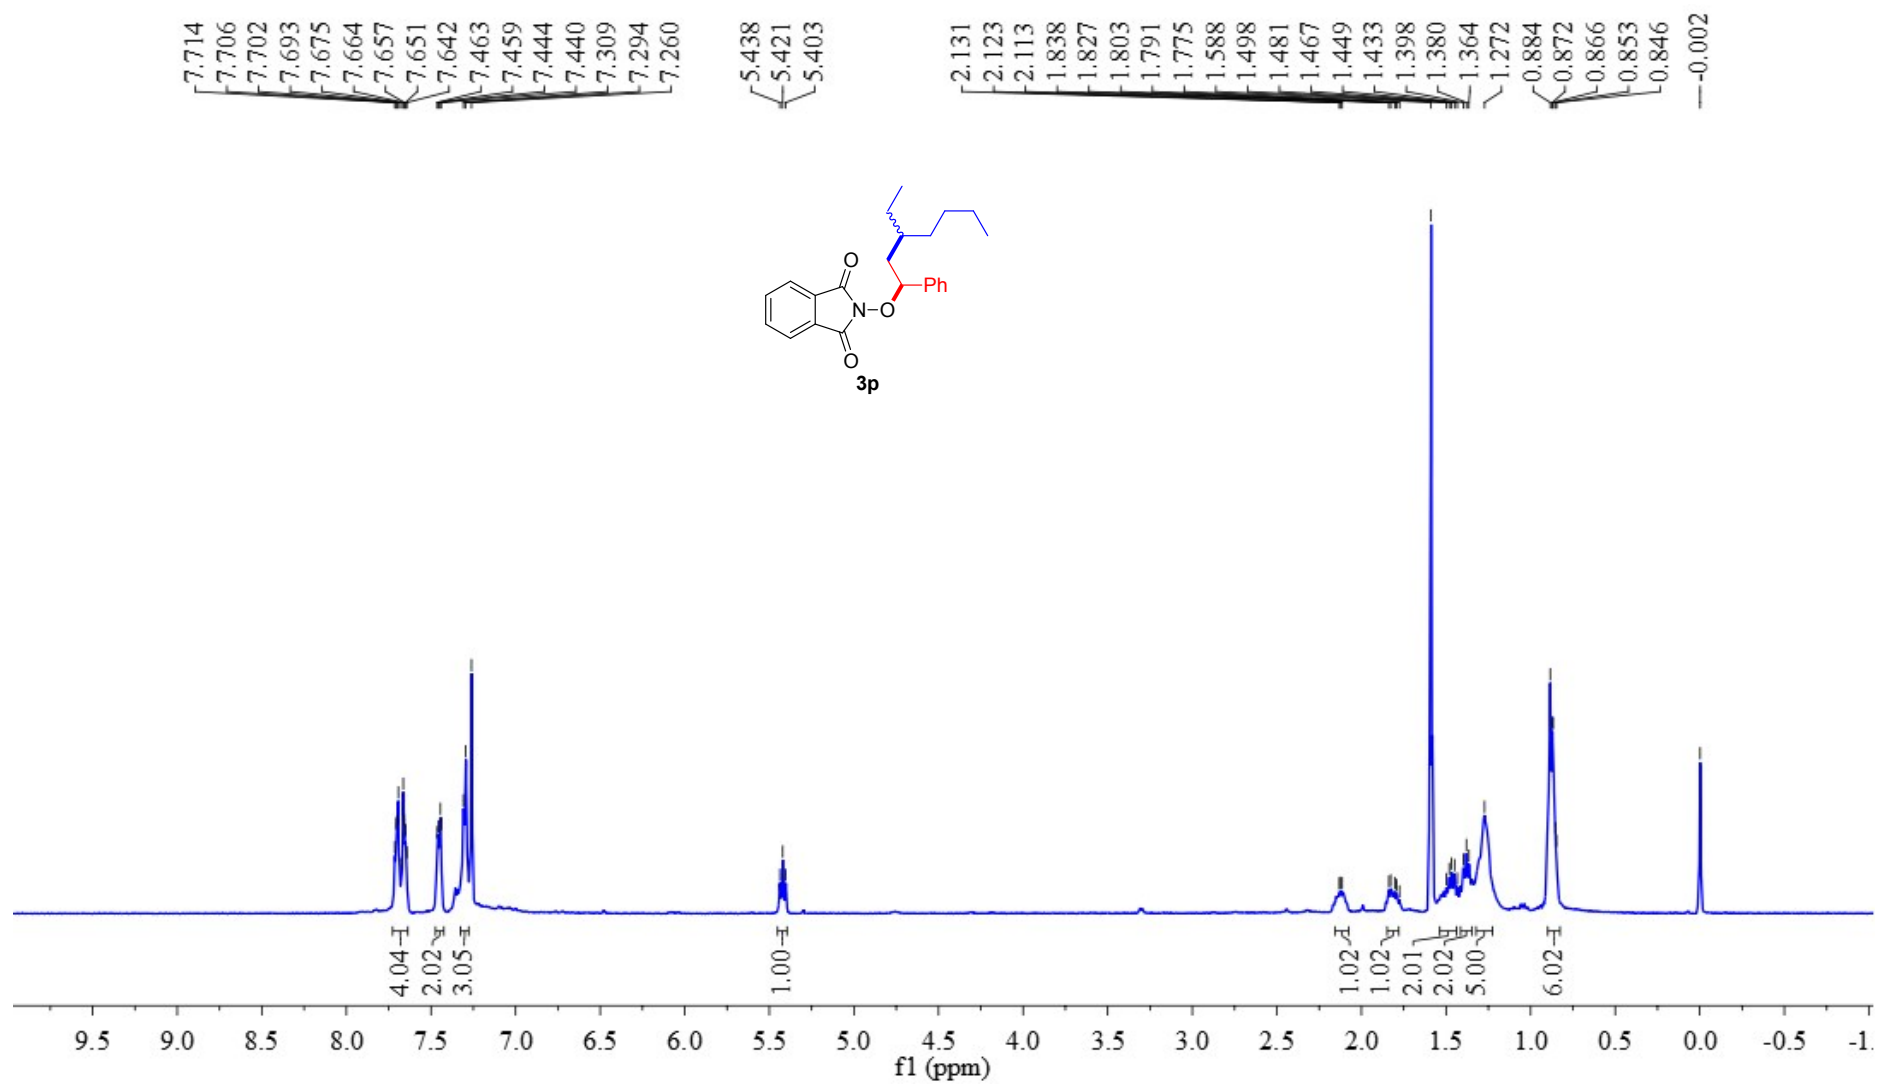

s42

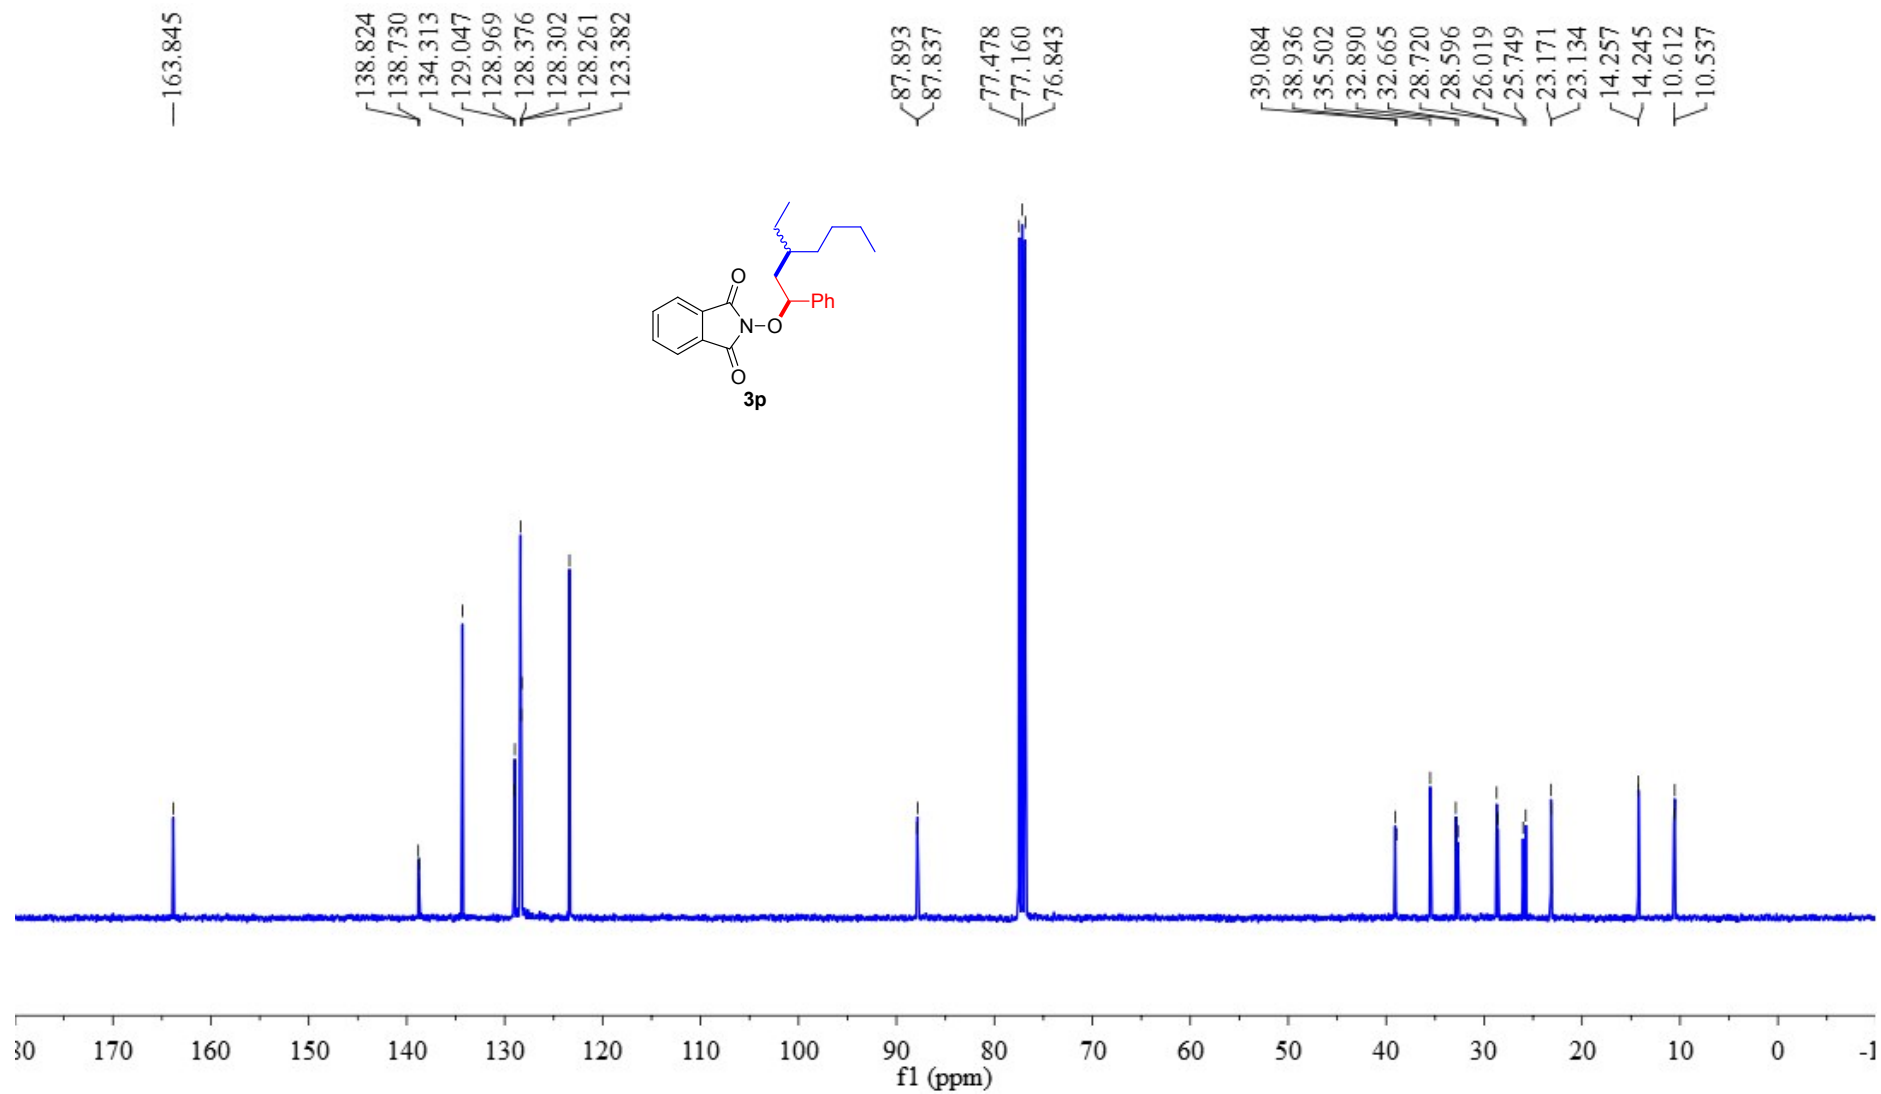

s43

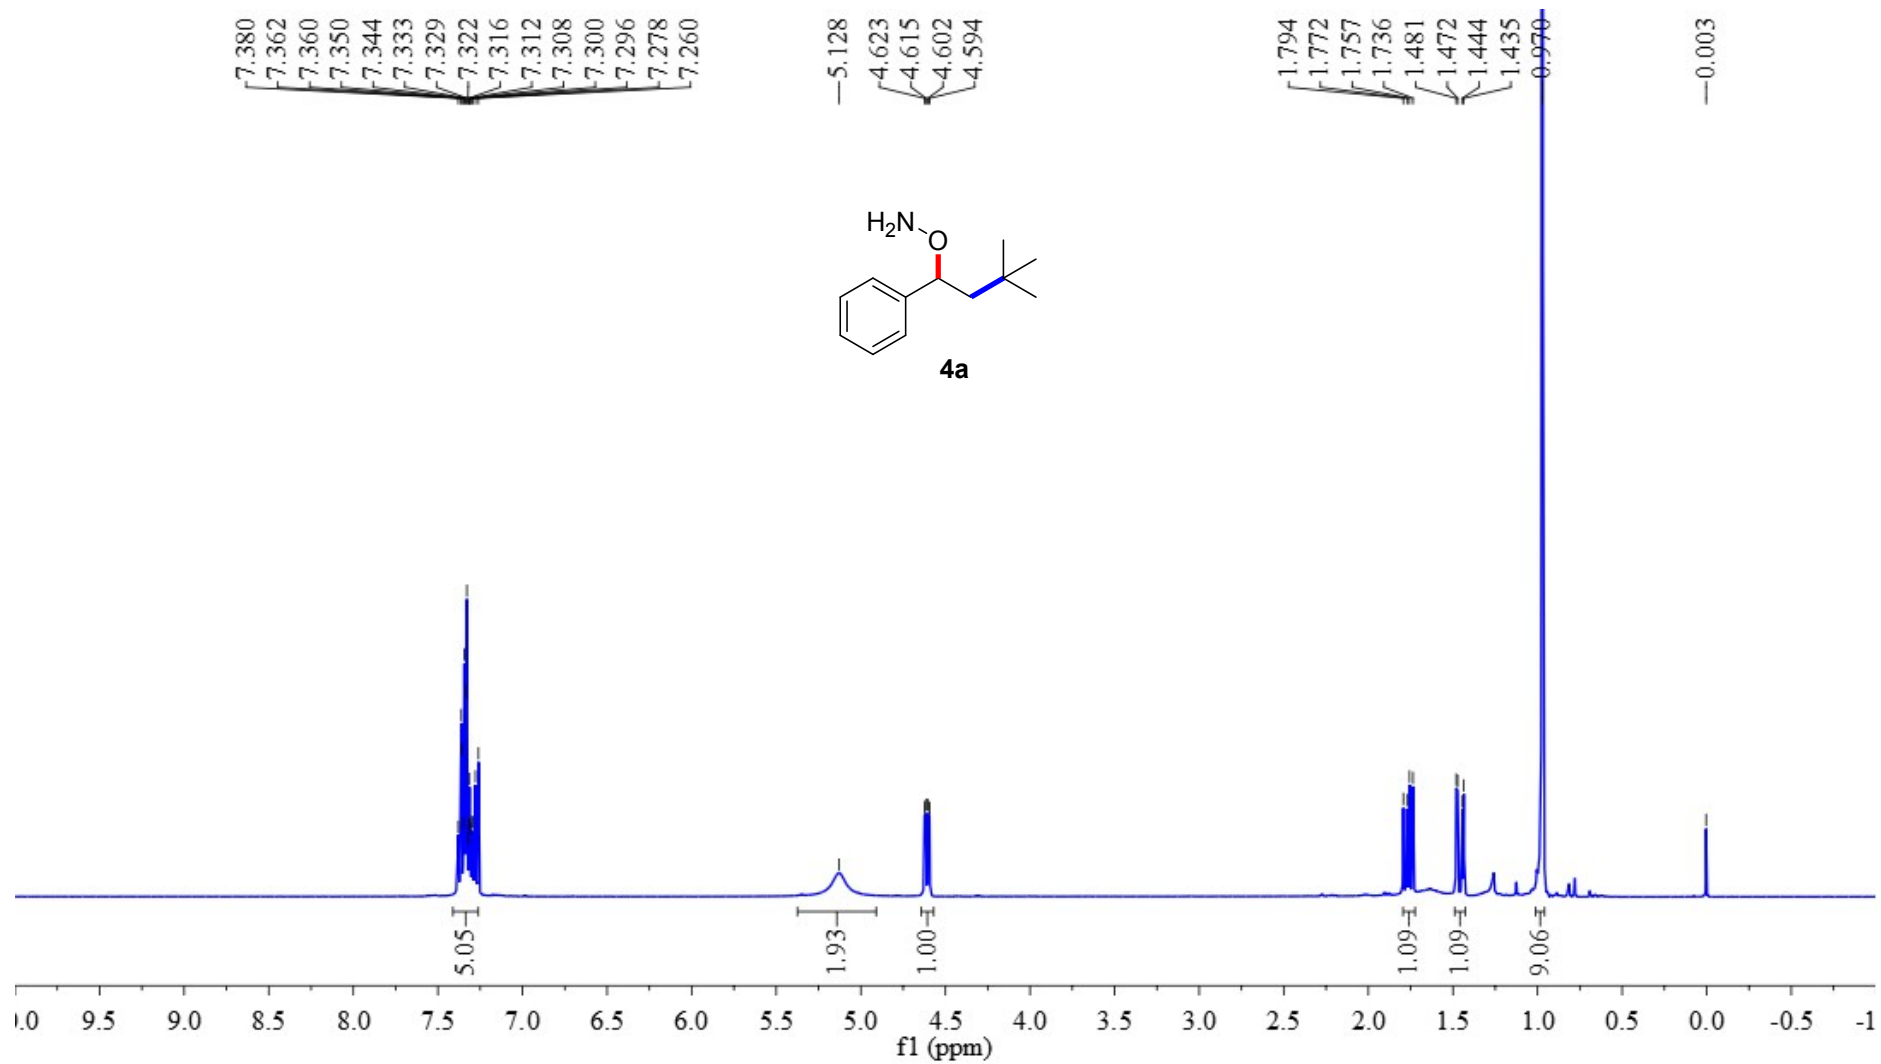

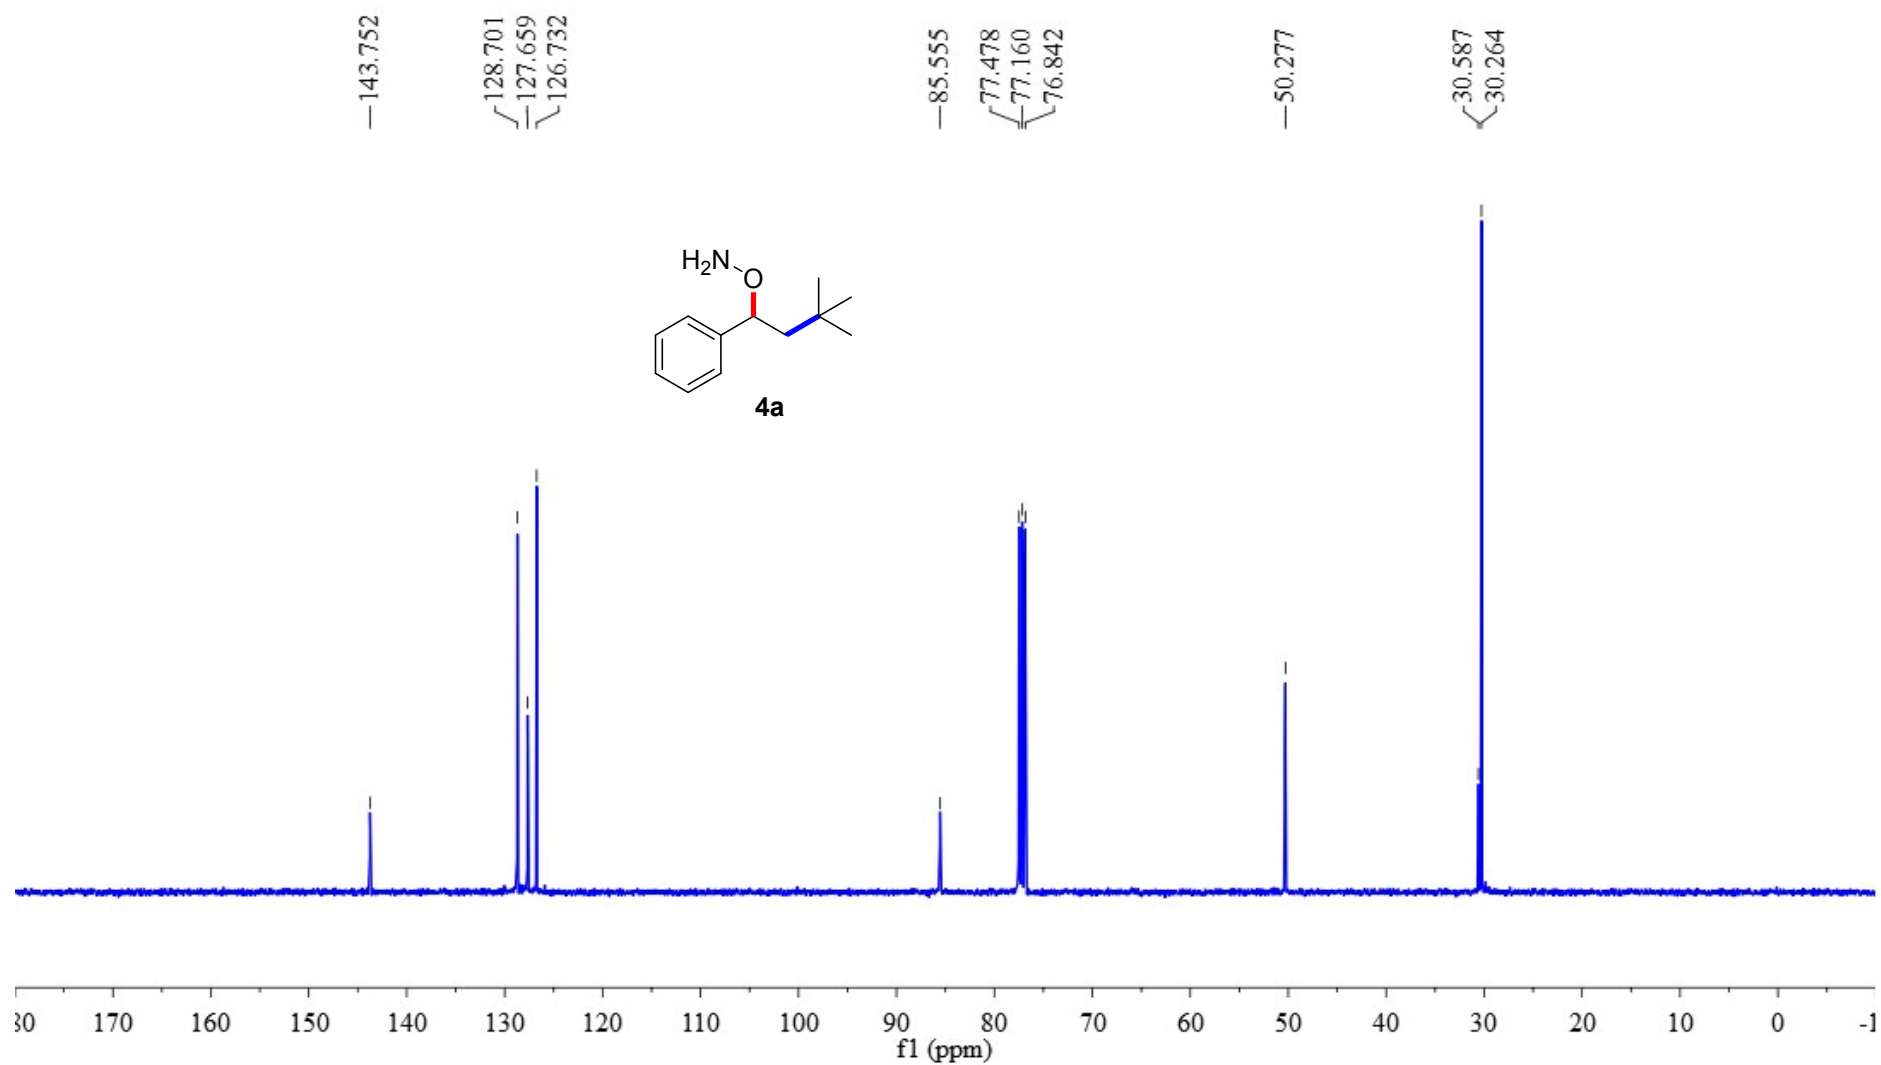

Supplement: c7ob00030h1.pdf [file c7ob00030h1.pdf]
